# Supplementary material
Source: PubMed Central journal article supplement (PMC4893790)
Supplement: NIHMS788696-supplement-supplemental_information.pdf [file NIHMS788696-supplement-supplemental_information.pdf]

# Type 1 Diabetes Cadaveric Human Pancreata Exhibit a Unique Exocrine Tissue Proteomic Profile

Chih-Wei Liu, Mark A. Atkinson and Qibin Zhang

## Supplementary Figures

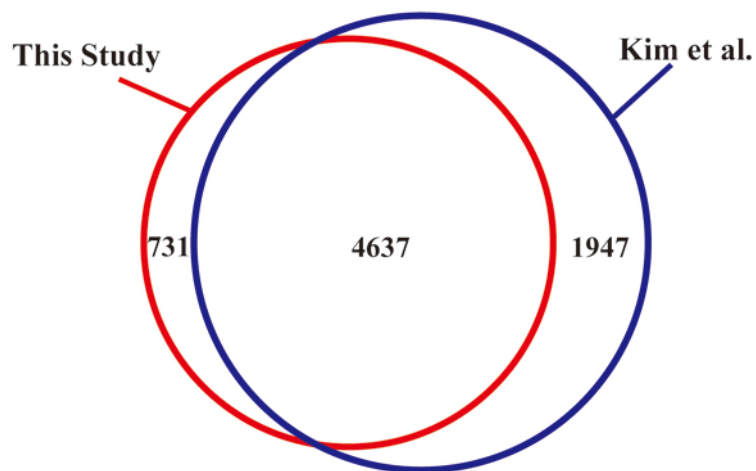

**Figure S1. Venn diagram showing pancreatic head proteome identified in this study and pancreatic proteome by Kim et al. [1] Raw datasets in the latter were re-searched using MaxQuant under the same parameters used in our study. The calculation was based on gene name information in those two datasets.**

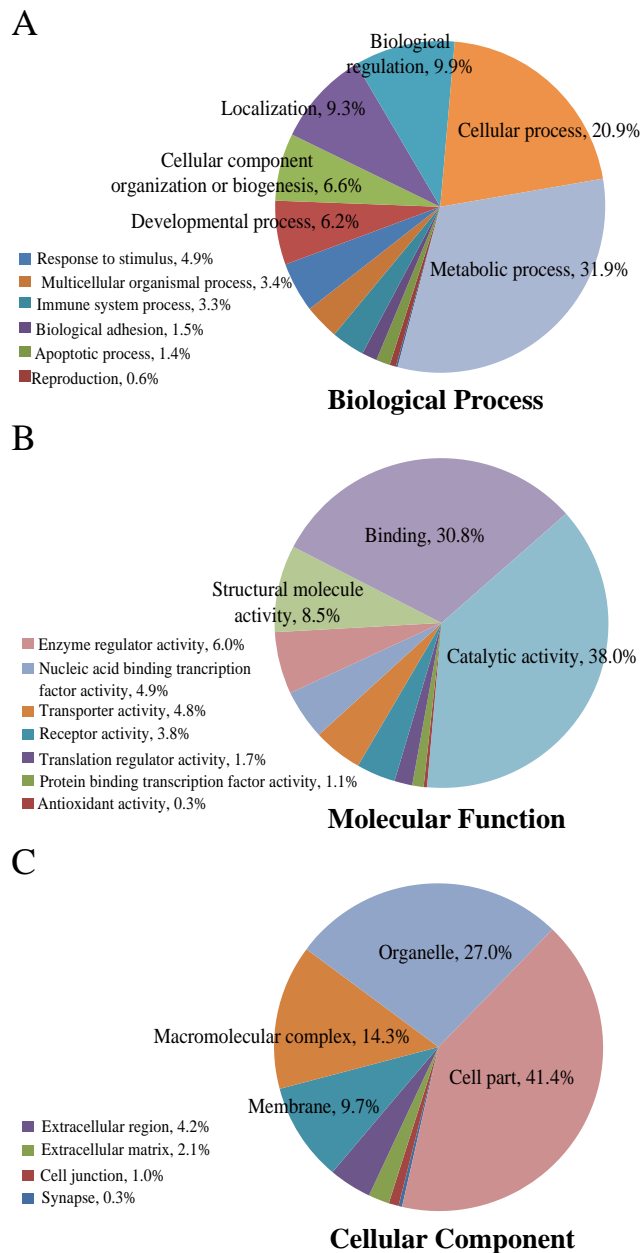

**Figure S2. Gene Ontology (GO) functional classification of the pooled isolated human pancreatic islets proteome identified in Schrimp-Rutledge et al.[2]** In total, 6649 “Entrez Gene Symbol” provided in that report of Schrimp-Ruledge et al. were analyzed by PANTHER software, and 9834, 5809, and 3032 annotation hits were found in the categories of biological process (A), molecular function (B), and cellular component (C), respectively.

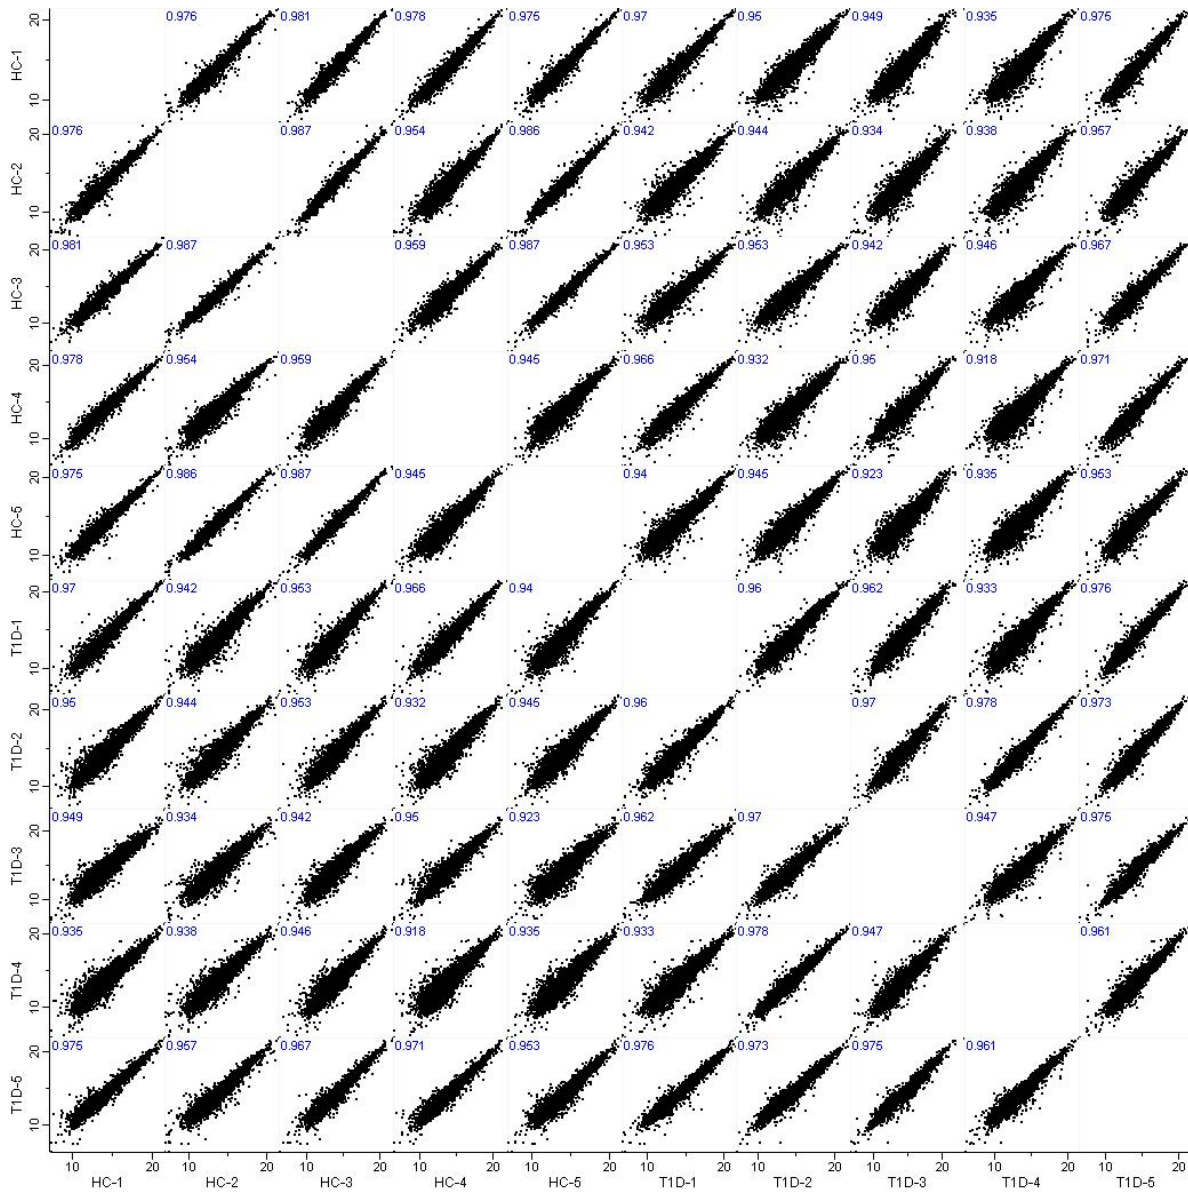

**Figure S3. Multi-scatter plot of pancreatic tissue proteome from samples of Type 1 diabetes and healthy subjects.**

The plot exhibits a good correlation among the biological replicates with an average Pearson's correlation coefficient of 0.96. T1D and HC in the plot indicate samples belonging to type-1 diabetes and healthy control subjects, respectively.

## REFERENCES

[1] Kim, M. S., Pinto, S. M., Getnet, D., Nirujogi, R. S., *et al.*, A draft map of the human proteome. *Nature* 2014, *509*, 575-581.

[2] Schrimpe-Rutledge, A. C., Fontes, G., Gritsenko, M. A., Norbeck, A. D., *et al.*, Discovery of novel glucose-regulated proteins in isolated human pancreatic islets using LC-MS/MS-based proteomics. *Journal of proteome research* 2012, *11*, 3520-3532.







| Gene            | Chromosome                    | Start (kb)         | End (kb) | Strand | Transcript | Enriched | Moderate | Moderate | Enriched |        |        |        |        |        |        |        |        |          |          |          |          |          |          |
|-----------------|-------------------------------|--------------------|----------|--------|------------|----------|----------|----------|----------|--------|--------|--------|--------|--------|--------|--------|--------|----------|----------|----------|----------|----------|----------|
| ETEPW5:G3M9B    | Suppressor of tumori          | 57T:27L            | 58.067   | 8.7    | 4          | 4        | 6.6413   | 0.3623   | 4475.4   | 4691.3 | 2743.5 | 6085.2 | 3510.7 | 3977.3 | 2825.1 | 2889   | 3063.3 | Enriched | Moderate | Moderate | Enriched |          |          |
| BZ7M1:0911974   | Retenon/Retenon - RTN3        | 12.747             | 8.9      | 2      | 2          | 4.4508   | 0.00042  | 3128.3   | 1196     | 1947.6 | 2166.4 | 1732   | 1058.5 | 2454.9 | 1955.1 | 1307.3 | 1644.1 | Enriched | Enriched | Enriched | No exons |          |          |
| BZ761:030187    | Amnion-ectoderm               | 10:27              | 5.8      | 5      | 5          | 11.306   | 0        | 884.7    | 0        | 884.7  | 0      | 0      | 5699.2 | 6692.8 | 6581.3 | 2463.5 | 6092.8 | Enriched | Enriched | Enriched | Low      |          |          |
| BZ751:EPH9M9A   | Ankyrin-2                     | ANK2               | 12.9     | 5      | 3          | 5.7298   | 0        | 8342.3   | 9924.3   | 10492  | 8927   | 12325  | 7342   | 7174.3 | 6291.4 | 3099   | 7198.1 | Low      | No exons | Moderate | No exons |          |          |
| BZ745:DDC9R     | Guanine cyclase subunit DCU27 | 67.601             | 2.2      | 1      | 1          | 5.0115   | 0.00044  | 5324.3   | 4620.9   | 5047.3 | 4852.7 | 4522.2 | 5038   | 5416.4 | 9616.7 | 13709  | 6578.2 | Low      | Moderate | Enriched | Low      |          |          |
| BZ738:DP96Q47   | Probable ATP domain DDC7      | 82.604             | 7.7      | 7      | 7          | 27.1995  | 0        | 17288    | 13984    | 19891  | 18525  | 19186  | 16997  | 21236  | 22911  | 12767  | 23444  | Enriched | Enriched | Enriched | No exons |          |          |
| BZ725:Q9P9J2    | Winged-helix domain WHD1      | 52.462             | 3.5      | 1      | 1          | 18.7845  | 0        | 47896    | 90029    | 89641  | 57415  | 57414  | 80921  | 11662  | 9242   | 6925.1 | 9207.2 | Enriched | Moderate | Moderate | Enriched |          |          |
| BZ706:EP7E86    | E3 ubiquitin-protein          | 35.448             | 2.2      | 1      | 1          | 1.2768   | 0.0056   | 5220.8   | 4322.7   | 6527.6 | 6517.1 | 7105.3 | 4999.5 | 8107.1 | 5997.5 | 5275.4 | 7433.2 | Enriched | Moderate | Low      | Moderate |          |          |
| BZ704:06:ZBT7A0 | Goldilox protein A            | CPBR9A:GPR98B:GPR9 | 58.408   | 17     | 9          | 9        | 21.259   | 0        | 10385    | 8328.8 | 8765.5 | 11519  | 9148.8 | 14596  | 27731  | 41511  | 10485  | 16492    | Enriched | Enriched | Enriched | No exons |          |
| BZ701:09H954    | Calcium-binding protein       | 10:27              | 25.6     | 1      | 1          | 1.7845   | 0        | 47896    | 90029    | 89641  | 57415  | 57414  | 80921  | 11662  | 9242   | 6925.1 | 9207.2 | Enriched | Moderate | Moderate | Enriched |          |          |
| Q6N8N:R9W6Z6    | Syntaxin-16                   | 16:16:16X16:NPEP1  | 23.021   | 17.8   | 3          | 3        | 6.8833   | 0        | 14437    | 11241  | 11173  | 16044  | 12594  | 16024  | 14938  | 13623  | 8520.5 | 13646    | Enriched | Enriched | Enriched | No exons |          |
| BZ717:Q6D9V52   | CTC2D8                        | 11:20:28           | 2.9      | 1      | 1          | 2.0551   | 0.0074   | 3966.3   | 2291.1   | 2885.1 | 2881.4 | 2979.9 | 7750.2 | 5220.8 | 2219.9 | 3981.7 | 2781.4 | Moderate | Enriched | Moderate | No exons |          |          |
| BZ718:09N8161   | Endophilin-B2                 | SHGLB2             | 44.164   | 19.8   | 10         | 10       | 20.729   | 0        | 15296    | 22345  | 27482  | 12628  | 17224  | 11853  | 42565  | 32273  | 17575  | 15711    | Enriched | Enriched | Moderate | No exons |          |
| BZ716:09H424    | Inter-alpha-trypsin inhibitor | 17:84              | 103.88   | 12.3   | 16         | 8        | 18.7845  | 0        | 47896    | 90029  | 89641  | 57415  | 57414  | 80921  | 11662  | 9242   | 6925.1 | 9207.2   | Enriched | Moderate | Moderate | Enriched |          |
| Q6P83:1J0K851   | Cyclin-dependent kinase CDK1  | 11:20:28           | 91.066   | 8.1    | 8          | 18.7526  | 0        | 39891    | 31325    | 32622  | 30159  | 39985  | 27096  | 24904  | 34620  | 21482  | 32624  | No exons | Moderate | Moderate | Moderate |          |          |
| ETEN85:R8ZZ474  | Small nucleolar rRNA          | rBMP4              | 27.091   | 4.7    | 1          | 1        | 3.3005   | 0.00078  | 8156.6   | 8265.9 | 9119.1 | 9829.2 | 11674  | 7758.2 | 12915  | 10238  | 6961.3 | 12061    | Enriched | Enriched | Enriched | Moderate |          |
| C9LE1:030M44B   | Eukaryotic translation        | EIF2E2             | 24.602   | 25.6   | 9          | 9        | 16.1606  | 0        | 27834    | 21220  | 14507  | 13390  | 20666  | 14159  | 20852  | 5801   | 19913  | Enriched | Enriched | Enriched | Moderate |          |          |
| BZ525A          | GLS3                          | 18.634             | 31.4     | 7      | 1          | 4.2281   | 0.00083  | 11467.6  | 7613.4   | 6687.2 | 6095.3 | 8119.6 | 5165.5 | 4537.5 | 4524.6 | 2462.3 | 5890.8 | Enriched | Enriched | Enriched | Enriched |          |          |
| BZ522:08N9V3    | WD repeat, SAM and WSDUB1     | 14.767             | 2.3      | 1      | 1          | 2.3697   | 0.00048  | 3582.4   | 2157.4   | 2004.2 | 2792   | 3061.2 | 3148.8 | 2265.6 | 1608   | 2212.2 | 2205   | Low      | Enriched | No exons | No exons |          |          |
| BZ523:09H80M    | Protein eva-1 homolog EVA1A   | 11.663             | 16.4     | 2      | 2          | 3.8356   | 0.00061  | 1263.3   | 655.1    | 1106.4 | 932.74 | 982.25 | 1089.2 | 471.63 | 558.24 | 2145.5 | 740.23 | 14.6     | Enriched | Enriched | Enriched | Low      |          |
| BZ521:Q9N753    | MAGL2 p53 subunit             | 18:37              | 2.6      | 6      | 6          | 11.6149  | 0        | 5096.2   | 4392.3   | 4352.1 | 6006   | 562.6  | 3400   | 5452.8 | 5358.3 | 2232.6 | 5314.8 | No exons | Low      | Enriched | Low      |          |          |
| BZ520:R9A023Z   | Small ubiquitin-related SUMO1 | 6.6846             | 19       | 2      | 2          | 4.692    | 0.00043  | 1070.3   | 1125.8   | 887.35 | 1410.2 | 2039.8 | 1855.5 | 2460.9 | 1823.7 | 1396.3 | 2122.7 | 1396.3   | Enriched | Enriched | Enriched | Moderate |          |
| BZ521:R9A023Z   | Igkappa                       | FIAM2A             | 46.919   | 5.5    | 2          | 2        | 2.1246   | 0.00069  | 7925.8   | 5910   | 10161  | 10933  | 12102  | 9408   | 13472  | 15338  | 9736.3 | 12005    | No exons | Enriched | Enriched | No exons |          |
| BZ520:R9A023Z   | Protein-ubiquitin domain      | PTK2A              | 11.738   | 3.4    | 11         | 11       | 102.48   | 0        | 56984    | 27258  | 34947  | 49484  | 48364  | 21470  | 12250  | 23640  | 10359  | 10359    | Enriched | Enriched | Enriched | Enriched |          |
| BZ520:R9A023Z   | Ankyrin repeat                | ANKZF1             | 57.572   | 7.6    | 4          | 4        | 8.3134   | 0        | 19118    | 15188  | 17677  | 22780  | 18948  | 21436  | 22566  | 22030  | 14654  | 21628    | Moderate | Low      | Moderate | No exons |          |
| BZ520:R9A023Z   | Transcription elongation      | TCEB2              | 12.527   | 38.1   | 6          | 6        | 36.936   | 0        | 88284    | 74372  | 80168  | 75614  | 121600 | 88221  | 44710  | 59713  | 57406  | No exons | Enriched | Enriched | Enriched | Enriched |          |
| BZ520:R9A023Z   | 3S ribosomal protein          | MRP30              | 11.935   | 10.9   | 1          | 1        | 3.0664   | 0.00114  | 4867.1   | 4403.9 | 5114.3 | 4177.5 | 5792.6 | 5566.4 | 5835.6 | 5327.5 | 2889   | 6803.8   | Enriched | Enriched | Enriched | No exons |          |
| BZ520:R9A023Z   | Mediator subunit              | MRAP2              | 50.628   | 28.4   | 2          | 2        | 4.6617   | 0.00063  | 6700.1   | 6956   | 7251.7 | 9296.5 | 8195.6 | 7435.2 | 8629.7 | 4991.5 | 8822   | 1491     | Moderate | Moderate | Moderate | Enriched |          |
| BZ520:R9A023Z   | Arg-GAP domain                | ARGAP2             | 25.957   | 18.5   | 7          | 7        | 14.933   | 0        | 14010    | 52750  | 46360  | 50922  | 50927  | 27657  | 56957  | 41095  | 22808  | 3857.8   | Enriched | Enriched | Enriched | No exons |          |
| BZ520:R9A023Z   | U4L6L15 rRNA                  | U4L6L15            | 62.043   | 18.8   | 11         | 11       | 46.122   | 0        | 15939    | 5007   | 46316  | 50022  | 38360  | 51073  | 51767  | 58988  | 2887   | 58499    | Low      | Moderate | No exons | No exons |          |
| BZ520:R9A023Z   | Small nucleolar rRNA          | rBMP2              | 79.783   | 46.8   | 46         | 46       | 33.28071 | 0        | 54580    | 14660  | 19910  | 19020  | 22790  | 24710  | 38940  | 33810  | 19000  | 25689    | Enriched | Enriched | Enriched | Enriched |          |
| BZ520:R9A023Z   | SWI5-related motif            | TRAF2              | 26.714   | 16.5   | 5          | 5        | 17.8459  | 0        | 42886    | 99027  | 71718  | 97288  | 10174  | 10174  | 10174  | 10174  | 10174  | 10174    | Enriched | Enriched | Enriched | Enriched |          |
| BZ520:R9A023Z   | RNA-binding protein           | RRM1B2             | 10.27    | 6.2    | 4          | 4        | 8.4393   | 0        | 11698    | 8175.1 | 14988  | 15584  | 14288  | 12021  | 13884  | 13600  | 7329.7 | 12046    | Low      | No exons | Moderate | No exons |          |
| BZ520:R9A023Z   | INMEP                         | 29.865             | 23.3     | 11     | 11         | 10.493   | 0        | 11624    | 11698    | 11552  | 5062   | 6286   | 6286   | 26108  | 27232  | 7616   | 10596  | Enriched | Enriched | Enriched | Enriched |          |          |
| BZ520:R9A023Z   | E3 ubiquitin-protein          | UBNF1P7            | 17.299   | 6.9    | 1          | 1        | 4.6049   | 0.00273  | 2364.4   | 2294.9 | 2364.4 | 2294.9 | 2364.4 | 2294.9 | 2364.4 | 2294.9 | 2364.4 | 2294.9   | Enriched | Enriched | Enriched | Enriched |          |
| BZ520:R9A023Z   | Private dehydrogenase         | PKN1               | 17.75    | 15.6   | 3          | 3        | 3.0828   | 0.00114  | 11612    | 8335.5 | 9611   | 11523  | 11539  | 10523  | 9860.8 | 7285   | 7021.5 | 9980.7   | Low      | Moderate | Enriched | No exons |          |
| BZ520:R9A023Z   | CDK1                          | 17.75              | 15.6     | 3      | 3          | 15.576   | 0        | 19240    | 8005.2   | 11284  | 9800.5 | 17329  | 6115.1 | 13610  | 12901  | 6542.9 | 13059  | Enriched | Enriched | Enriched | Enriched |          |          |
| BZ520:R9A023Z   | NEP400-conjugating            | UBP1               | 15.674   | 15.2   | 3          | 3        | 6.03131  | 0        | 3131     | 2999.6 | 3040.5 | 2068.1 | 4701.7 | 1466.2 | 1355.8 | 1578.8 | 10957  | 1230     | Enriched | Enriched | Enriched | No exons |          |
| BZ520:R9A023Z   | NEP400-conjugating            | UBP2               | 17.049   | 17.049 | 1          | 1        | 7.019    | 0.00238  | 8745.8   | 4392.2 | 4352.1 | 6006   | 562.6  | 3400   | 5452.8 | 5358.3 | 2232.6 | 5314.8   | No exons | Low      | Enriched | Low      |          |
| BZ520:R9A023Z   | NEP400-conjugating            | UBP3               | 29.685   | 10.2   | 2          | 2        | 3.2329   | 0.00077  | 9607.8   | 8427.7 | 8937.5 | 9652.4 | 11119  | 10872  | 12141  | 10932  | 6149   | 10861    | Moderate | Low      | Moderate | Low      |          |
| BZ520:R9A023Z   | NEP400-conjugating            | UBP4               | 10.694   | 4.3    | 10         | 10       | 30.243   | 0        | 9315.6   | 5138.1 | 7471.2 | 4841.6 | 7072.6 | 10032  | 6177.1 | 4776   | 3042.7 | 7035.4   | Enriched | Enriched | Enriched | Enriched |          |
| BZ520:R9A023Z   | Transducin-associated         | SRK2               | 29.373   | 25.6   | 11         | 11       | 10.1     | 0.00161  | 8145     | 28395  | 13184  | 29062  | 50271  | 51666  | 10920  | 31602  | 31602  | 47343    | Enriched | Enriched | Enriched | Enriched |          |
| BZ520:R9A023Z   | Ribosome-phosphate            | RPE1:RPEL1         | 20.972   | 15.7   | 6          | 6        | 32.774   | 0        | 21625    | 19787  | 18450  | 20001  | 19196  | 15652  | 18689  | 18990  | 16080  | 19751    | Moderate | Enriched | Enriched | No exons |          |
| BZ520:R9A023Z   | NADH dehydrogenase            | ND4FB2             | 9.3942   | 12.8   | 2          | 2        | 2.1423   | 0.0061   | 2474.2   | 2267   | 2216.7 | 1671.1 | 3647.7 | 2414.9 | 3288.5 | 1926   | 2020.1 | 2761.1   | Enriched | Enriched | Enriched | No exons |          |
| BZ520:R9A023Z   | Nucleoside-interacting        | ZC7H13             | 50.562   | 11.8   | 4          | 4        | 8.1188   | 0        | 17997    | 19224  | 20647  | 15235  | 31234  | 14261  | 16890  | 12125  | 11453  | 15010    | Low      | Enriched | Enriched | No exons |          |
| BZ520:R9A023Z   | Mediator subunit              | MRAP2              | 50.628   | 28.4   | 2          | 2        | 4.6617   | 0.00063  | 6700.1   | 6956   | 7251.7 | 9296.5 | 8195.6 | 7435.2 | 8629.7 | 4991.5 | 8822   | 1491     | Moderate | Moderate | Moderate | Enriched |          |
| BZ520:R9A023Z   | Small ubiquitin-related       | SUMO1              | 6.6846   | 19     | 2          | 2        | 4.692    | 0.00043  | 1070.3   | 1125.8 | 887.35 | 1410.2 | 2039.8 | 1855.5 | 2460.9 | 1823.7 | 1396.3 | 2122.7   | 1396.3   | Enriched | Enriched | Enriched | Moderate |
| BZ520:R9A023Z   | Nucleoside-interacting        | ZC7H13             | 50.562   | 11.8   | 4          | 4        | 8.1188   | 0        | 17997    | 19224  | 20647  | 15235  | 31234  | 14261  | 16890  | 12125  | 11453  | 15010    | Low      | Enriched | Enriched | No exons |          |
| BZ520:R9A023Z   | Mediator subunit              | MRAP2              | 50.628   | 28.4   | 2          | 2        | 4.6617   | 0.00063  | 6700.1   | 6956   | 7251.7 | 9296.5 | 8195.6 | 7435.2 | 8629.7 | 4991.5 | 8822   | 1491     | Moderate | Moderate | Moderate | Enriched |          |
| BZ520:R9A023Z   | Small ubiquitin-related       | SUMO1              | 6.6846   | 19     | 2          | 2        | 4.692    | 0.00043  | 1070.3   |        |        |        |        |        |        |        |        |          |          |          |          |          |          |







|                    |                                                    |         |      |    |         |         |         |        |         |         |         |         |         |         |         |         |          |          |          |          |          |          |          |        |
|--------------------|----------------------------------------------------|---------|------|----|---------|---------|---------|--------|---------|---------|---------|---------|---------|---------|---------|---------|----------|----------|----------|----------|----------|----------|----------|--------|
| EPFRK2.06959.H     | Probable asparagine-NAR52                          | 27.205  | 12   | 3  | 19.929  | 0       | 4192.6  | 3356.3 | 3972.8  | 2978.7  | 4609.7  | 4629.1  | 10982   | 7521.4  | 7682.9  | 8477.8  | Moderate | Enriched | Moderate | Enriched | No       | expos    | YES      |        |
| EPRL3.5497E9.P99.H | CHDI1                                              | 14.852  | 50   | 12 | 1.21968 | 0.00044 | 4429.8  | 2419.4 | 1893    | 1545.3  | 2450.8  | 1317.9  | 1292.9  | 1069.8  | 1099.8  | 2153.3  | Enriched | Enriched | Enriched | Enriched | No       | expos    | YES      |        |
| EPRL5.8269E2.P     | Human-specific CHD1                                | 76.549  | 36   | 6  | 0.00000 | 0.00000 | 4390.7  | 2499.0 | 1820.9  | 1545.3  | 2450.8  | 1317.9  | 1292.9  | 1069.8  | 1099.8  | 2153.3  | Enriched | Enriched | Enriched | Enriched | No       | expos    | YES      |        |
| EPSP1.E9P0Y7.E     | Transmembrane 9 superfamily member 1               | 92.856  | 9.1  | 8  | 16.816  | 0       | 22.966  | 44.622 | 2081.2  | 2400.6  | 2952.4  | 1719.9  | 1873.8  | 1452.4  | 1508.8  | 1901.4  | Enriched | Enriched | Enriched | Enriched | No       | expos    | YES      |        |
| F1L1L7             | LOC100287322                                       | 22.007  | 44.7 | 15 | 2.2404  | 0.00412 | 21234.4 | 11411  | 11210   | 6158.3  | 20789   | 4385.3  | 14043   | 4740.9  | 10160   | 10160   | 12245    | Enriched | Enriched | Enriched | Enriched | No       | expos    | YES    |
| F1L2L1             | Protein transmembrane superfamily 1                | 249.48  | 14.1 | 36 | 36      | 2.4074  | 22264.0 | 17540  | 19420.0 | 18862.0 | 32840.0 | 18230.0 | 21760.0 | 17960.0 | 10710.0 | 10710.0 | Enriched | Enriched | Enriched | Enriched | No       | expos    | YES      |        |
| F2Z29.P99B5L2.G    | Gumma domain containing 2                          | 82.403  | 6    | 6  | 8.40    | 0       | 15.48   | 10587  | 11500   | 13179   | 8898.6  | 1242    | 11185   | 17398   | 851.1   | 14798   | Enriched | Enriched | Enriched | Enriched | No       | expos    | YES      |        |
| F2Z29E.095777.7    | Gumma domain containing 2                          | 73.713  | 58.2 | 6  | 6       | 82.380  | 16753   | 13087  | 12708   | 35699   | 16729   | 14728   | 12801   | 15028   | 7399.4  | 41867   | Low      | Moderate | Enriched | Enriched | No       | expos    | YES      |        |
| F2Z29E.095777.8    | Gumma domain containing 2                          | 66.988  | 7.5  | 5  | 5       | 19.402  | 10      | 34.067 | 32403   | 30883   | 37141   | 36312   | 23797   | 26925   | 34798   | 24142   | 31805    | Enriched | Enriched | Enriched | Enriched | No       | expos    | YES    |
| G5STR5.GAY54A.1    | Dual-specific RNAse H1                             | 14.14   | 20.6 | 2  | 1.514   | 0.00000 | 10.000  | 10.000 | 10.000  | 10.000  | 10.000  | 10.000  | 10.000  | 10.000  | 10.000  | 10.000  | 10.000   | 10.000   | 10.000   | 10.000   | 10.000   | 10.000   | 10.000   | 10.000 |
| HG04A.P08813.F     | Adenosine deaminase 2                              | 38.292  | 10.9 | 4  | 4       | 7.2047  | 0       | 9837.5 | 9324.2  | 10028   | 10309   | 8245.8  | 10141   | 12400   | 13063   | 5038.5  | 12643    | Enriched | Enriched | Moderate | Moderate | Enriched | Enriched |        |
| HYG0A.JG5W9V       | WASH complex subunit 3                             | 11.414  | 12.1 | 1  | 1       | 2.6445  | 0.00274 | 26103  | 11301   | 12109   | 26750   | 11464   | 17609   | 15858   | 21799   | 10688   | 17336    | No       | expos    | Moderate | Moderate | No       | expos    | YES    |
| ISK074.0944A3      | Serine-threonine serine kinase 1                   | 225.5   | 2.4  | 4  | 4       | 23.23   | 0       | 17685  | 12902   | 14907   | 15432   | 17818   | 15152   | 17203   | 17100   | 10345   | 17251    | Enriched | Enriched | Enriched | Enriched | Enriched | Enriched |        |
| ISK074.0944A3      | Chromatin domain 6                                 | 211.71  | 15.1 | 29 | 29      | 90.981  | 0       | 12970  | 10033.0 | 11960   | 23160.0 | 11960   | 10800.0 | 16020.0 | 9475    | 10800   | 16020    | Enriched | Enriched | Enriched | Enriched | Enriched | Enriched |        |
| ISK074.0944A3      | Realtator complex subunit 1 (LMTOR1)               | 11.076  | 51.5 | 4  | 4       | 45.077  | 0       | 2847   | 2774    | 27825   | 17121   | 35825   | 25966   | 26326   | 21456   | 18930   | 24934    | Enriched | Enriched | Enriched | Enriched | Enriched | Enriched |        |
| ISK074.0944A3      | Endoglin                                           | 51.939  | 5.9  | 2  | 2       | 5.573   | 0       | 3386   | 3265.9  | 3138    | 2683.4  | 4600.7  | 1526.1  | 2522.4  | 2587.9  | 1141.8  | 4049.1   | Moderate | Low      | Moderate | Low      | Moderate | Low      |        |
| ISK074.0944A3      | CD166 antigen                                      | 95.928  | 2.8  | 25 | 25      | 64.789  | 0       | 16750  | 7943    | 11200   | 13860.0 | 14238.0 | 11200   | 96316   | 101890  | 54104   | 122650   | Enriched | Enriched | Enriched | Enriched | Enriched | Enriched |        |
| ISK074.0944A3      | Protein C10                                        | 11.953  | 50.5 | 3  | 3       | 4.329   | 0.00063 | 11260  | 10312   | 14344   | 22045   | 9179.1  | 11211   | 10488   | 1677.9  | 832.04  | 1540.9   | Enriched | Enriched | Enriched | Enriched | Enriched | Enriched |        |
| ISK074.0944A3      | Dolichyl-diphospho DAD                             | 9.541   | 50.6 | 6  | 6       | 14.546  | 0       | 44106  | 3907    | 40282   | 41373   | 38217   | 42327   | 40121   | 41667   | 19444   | 24250    | No       | expos    | Enriched | Enriched | Enriched | Enriched |        |
| ISK074.0944A3      | Conenelom complex subunit 1                        | 60.04   | 15.7 | 7  | 7       | 58.626  | 0       | 18991  | 2605    | 19930   | 21065   | 25155   | 24352   | 18529   | 33542   | 11153   | 23740    | Moderate | Moderate | Low      | Moderate | Low      | Enriched |        |
| ISK074.0944A3      | Oligonucleotide-binding domain 2                   | 22.006  | 42   | 9  | 9       | 76.287  | 0       | 9189   | 1006    | 8620    | 6708    | 4519    | 6070    | 8889.9  | 9167    | 7502    | 94024    | Enriched | Enriched | Enriched | Enriched | Enriched | No       | expos  |
| ISK074.0944A3      | Striatin-4                                         | 68.584  | 6.5  | 4  | 4       | 26.763  | 0       | 18331  | 1764    | 17930   | 11902   | 19913   | 9056.9  | 10955   | 9463.4  | 7200.6  | 10036    | Moderate | Moderate | Moderate | Moderate | Moderate | Moderate |        |
| ISK074.0944A3      | Ubiquitin thioesterase OTUB1                       | 28.05   | 51   | 24 | 11      | 59.313  | 0       | 8236   | 5169    | 6312    | 13640.0 | 7125    | 87128   | 80201   | 141390  | 53109   | 97180    | Enriched | Enriched | Enriched | Enriched | Enriched | Enriched |        |
| ISK074.0944A3      | V-type proton ATPase ATP9VD1                       | 44.459  | 12   | 6  | 6       | 10.6    | 0       | 37088  | 3029    | 38084   | 36003   | 41457   | 46544   | 39020   | 33657   | 47240   | 18208    | Moderate | Enriched | Enriched | Enriched | Enriched | Enriched |        |
| ISK074.0944A3      | Multifunctional methytransferase 12                | 92.555  | 48.1 | 4  | 4       | 9.0124  | 0       | 14993  | 11256   | 12281   | 13440   | 13627   | 14900   | 11515   | 13231   | 53192   | 13465    | Enriched | Enriched | Enriched | Enriched | Enriched | No       | expos  |
| ISK074.0944A3      | ADP-ribosylation factor 4                          | 23.887  | 19.4 | 3  | 3       | 6.05    | 0       | 23401  | 18357   | 26268   | 19288   | 21398   | 25084   | 60447   | 38619   | 39182   | 42360    | Moderate | Moderate | Enriched | Enriched | Enriched | Enriched |        |
| ISK074.0944A3      | Arf GTPase-activating factor 1                     | 61.277  | 19.8 | 10 | 10      | 21.358  | 0       | 18555  | 10570   | 20020   | 13213   | 23434   | 16049   | 64679   | 21646   | 32795   | 35324    | Enriched | Enriched | Enriched | Enriched | Enriched | Enriched |        |
| ISK074.0944A3      | DNA replication factor 1                           | 88.816  | 26   | 11 | 11      | 16.822  | 0.00029 | 14161  | 10822   | 10774   | 16711   | 51243   | 6721    | 51416   | 5741.2  | 6825.5  | No       | expos    | Moderate | Moderate | Enriched | Enriched | Enriched |        |
| ISK074.0944A3      | Paxillin                                           | 162.22  | 19.2 | 11 | 11      | 11.042  | 0       | 55632  | 4400    | 2589    | 4678    | 6735    | 5041    | 5884    | 4474    | 37387   | 52348    | Enriched | Enriched | Enriched | Enriched | Enriched | Moderate |        |
| ISK074.0944A3      | RAP1B                                              | 13.889  | 54.9 | 21 | 6       | 45.055  | 0       | 4209   | 2152    | 2476    | 24494   | 5797    | 25240   | 25193   | 36696   | 10257   | 4742     | Enriched | Enriched | Enriched | Enriched | Enriched | Enriched |        |
| ISK074.0944A3      | Thiamin phosphotransferase 1                       | 10.085  | 15.7 | 1  | 1       | 50.793  | 0       | 8851   | 5674.9  | 7023.1  | 5199    | 5913.7  | 7006.6  | 4732.9  | 9481.5  | 25019   | 9207.5   | Moderate | Low      | Moderate | No       | expos    | Enriched |        |
| ISK074.0944A3      | ATPase 13A4                                        | 64.872  | 9.1  | 8  | 8       | 49.849  | 0       | 12970  | 10033.0 | 11960   | 23160.0 | 11960   | 10800.0 | 16020.0 | 9475    | 10800   | 16020    | Enriched | Enriched | Enriched | Enriched | Enriched | Enriched |        |
| ISK074.0944A3      | Putative DnG-PdG-ALG10-ALG10                       | 8.790   | 12.3 | 2  | 2       | 8.759   | 0       | 300    | 2231.1  | 2281.4  | 4616.9  | 2625.4  | 2590.4  | 2861.8  | 1801    | 3573.2  | No       | expos    | Low      | Moderate | No       | expos    | Enriched |        |
| ISK074.0944A3      | ALG10B                                             | 14.293  | 42.5 | 13 | 1       | 4.8084  | 0.00043 | 14772  | 1352.8  | 2995.3  | 4397.7  | 1684.8  | 5256.1  | 10517   | 2806.6  | 15884   | 1570.8   | No       | expos    | Enriched | Enriched | Enriched | Enriched |        |
| ISK074.0944A3      | Gravimol-like domain 2                             | 184.21  | 13.9 | 21 | 21      | 24.877  | 0.00077 | 9189   | 1006    | 8620    | 6708    | 4519    | 6070    | 8889.9  | 9167    | 7502    | 94024    | Enriched | Enriched | Enriched | Enriched | Enriched | No       | expos  |
| ISK074.0944A3      | Speckle targeted PUF1                              | 98.434  | 2.9  | 3  | 3       | 5.9399  | 0       | 1179.8 | 1370.6  | 1318.8  | 415.63  | 1923.2  | 470.15  | 1565.4  | 971.56  | 1338.8  | 854.71   | Moderate | No       | expos    | Low      | Moderate | No       | expos  |
| ISK074.0944A3      | 2-oxoglutarate and 2-oxoglutarate oxidoreductase 2 | 17.534  | 9.4  | 1  | 1       | 2.525   | 0.00179 | 750.5  | 851.68  | 1024    | 858.33  | 1228.7  | 1232.4  | 2457.9  | 1850.1  | 1599.6  | 1814.6   | Enriched | Enriched | Moderate | No       | expos    | Enriched |        |
| ISK074.0944A3      | Ras-related protein R-RAS3                         | 21.214  | 45.9 | 9  | 9       | 23.9    | 0       | 4967.3 | 3021    | 3365    | 6209    | 4526.2  | 5452.5  | 4432.1  | 3875.6  | 23865   | 5474     | Enriched | Enriched | Enriched | Enriched | Enriched | Enriched |        |
| ISK074.0944A3      | Lysine-specific demethylase 2                      | 195.724 | 19.9 | 7  | 7       | 30.992  | 0.00062 | 39430  | 3141    | 28596   | 42969   | 36463   | 27883   | 24915   | 31412   | 52300   | 32360    | Enriched | Low      | Moderate | No       | expos    | Enriched |        |
| ISK074.0944A3      | High mobility group 1 (HMG2)                       | 10.767  | 21.2 | 1  | 1       | 5.4236  | 0       | 1835   | 1930.4  | 2320.3  | 979.47  | 3144.5  | 1176.1  | 1824.8  | 1133.6  | 1706.6  | 1879.4   | Moderate | Low      | Moderate | Low      | Moderate | Low      |        |
| ISK074.0944A3      | Elongation complex subunit 1 (ELP4)                | 111.47  | 2.4  | 23 | 23      | 6.2887  | 0       | 9189   | 1006    | 8620    | 6708    | 4519    | 6070    | 8889.9  | 9167    | 7502    | 94024    | Enriched | Enriched | Enriched | Enriched | Enriched | Enriched |        |
| ISK074.0944A3      | Cp1-interacting zinc finger protein 1              | 91.124  | 6.2  | 3  | 3       | 40.733  | 0       | 6681.9 | 5803    | 6811.9  | 8919.9  | 6472.9  | 6066.6  | 8733.1  | 11179   | 6455.5  | 9102.2   | Low      | Enriched | Enriched | Enriched | Enriched | Enriched |        |
| ISK074.0944A3      | Porphobilinogen deaminase 2                        | 35.761  | 12.1 | 6  | 6       | 21.305  | 0       | 26590  | 1600    | 2019    | 3264    | 23595   | 23681   | 28019   | 28672   | 15074   | 26699    | Enriched | Enriched | Enriched | Enriched | Enriched | Enriched |        |
| ISK074.0944A3      | Protein transmembrane superfamily 2                | 82.968  | 21.1 | 22 | 15      | 51.783  | 0       | 68398  | 6052    | 69859   | 5777    | 78304   | 61089   | 7941    | 66732   | 14712   | 66253    | No       | expos    | Low      | Moderate | Enriched | Enriched |        |
| ISK074.0944A3      | RNA polymerase II subunit 3                        | 19.432  | 11   | 11 | 11      | 7.828   | 0.00239 | 6437   | 1664    | 1661    | 5419    | 4296    | 1277    | 228     | 228     | 12008   | Enriched | Enriched | Enriched | Enriched | Enriched | Enriched |          |        |
| ISK074.0944A3      | ARHGDB2                                            | 17.936  | 45.3 | 7  | 7       | 21.344  | 0       | 6742.6 | 2561    | 1887    | 6168    | 29581   | 9138.9  | 5070.9  | 6349.9  | 5453.3  | Enriched |        |
| ISK074.0944A3      | Tumor suppressor 1                                 | 40.077  | 14.2 | 5  | 5       | 11.384  | 0       | 31923  | 16705   | 20071   | 4128    | 28089   | 29534   | 61541   | 60030   | 2449    | 26073    | Enriched | Enriched | Enriched | Enriched | Enriched | Enriched |        |
| ISK074.0944A3      | Class II histone H3                                | 83.553  | 19.3 | 6  | 6       | 3.8681  | 0.00061 | 22743  | 15324   | 18987   | 20689   | 19828   | 21019   | 16703   | 178     |         |          |          |          |          |          |          |          |        |





|               |                          |         |        |       |    |    |         |         |        |        |         |        |        |        |         |         |        |          |            |          |          |          |          |          |    |
|---------------|--------------------------|---------|--------|-------|----|----|---------|---------|--------|--------|---------|--------|--------|--------|---------|---------|--------|----------|------------|----------|----------|----------|----------|----------|----|
| JQK89-Q8RW8X  | Calcium homeostasis      | CHERP7  | 104.93 | 11.5  | 10 | 10 | 25.761  | 0       | 27799  | 27546  | 29563   | 28474  | 34465  | 18763  | 20024   | 18892   | 14874  | 23575    | Enriched   | Enriched | Enriched | Enriched | Enriched | YES      |    |
| JQK94         | Wt1                      | SFB3    | 10.175 | 25.1  | 3  | 2  | 2.1035  | 0       | 11035  | 6022.4 | 9849.7  | 27130  | 82318  | 17774  | 5753.4  | 6644.7  | 20158  | 16393    | Enriched   | Enriched | Enriched | Enriched | Enriched | YES      |    |
| JQK92WJL53    | ZSS ribosomal protein    | RPL27   | 20.825 | 24    | 4  | 4  | 8.629   | 0       | 14392  | 18022  | 25170   | 66398  | 25170  | 41108  | 21722   | 10795   | 42739  | Enriched | Enriched   | Enriched | Enriched | Enriched | NO       |          |    |
| JQK95W7880    | Protein S601 homolog     | S601    | 30.178 | 13    | 3  | 3  | 7.8704  | 0       | 19342  | 18495  | 19746   | 10173  | 25019  | 15540  | 19525   | 18357   | 13652  | 15757    | No         | Enriched | Enriched | Enriched | Enriched | NO       |    |
| JQK97L7Q9FV2J | Securin-2                | SCRN2   | 47.493 | 14.8  | 7  | 6  | 25.854  | 0       | 15493  | 10360  | 12097   | 68820  | 11404  | 19109  | 22001   | 14793   | 14417  | 22873    | Enriched   | Enriched | Enriched | Enriched | Enriched | NO       |    |
| JQK98         | Lamin B1                 | LMNB1   | 16.883 | 36.3  | 4  | 4  | 30.815  | 0       | 9893.1 | 5982   | 7574.2  | 36617  | 11290  | 5266.8 | 5173.3  | 4908.4  | 4987.8 | 5817.9   | Enriched   | Enriched | Enriched | Enriched | Enriched | NO       |    |
| JQK99Q9R2E2   | Cytosolic endonuclease   | ENDOGAE | 47.037 | 24    | 1  | 1  | 1.8117  | 0.00076 | 24076  | 24076  | 24076   | 2179.3 | 2085.4 | 2085.4 | 2085.4  | 2085.4  | 2085.4 | 2085.4   | Enriched   | Enriched | Enriched | Enriched | Enriched | NO       |    |
| JQK99P4626-5  | Resonance yvonne or ERL1 | ERL1    | 11.71  | 4.3   | 5  | 5  | 8.0509  | 0       | 12193  | 12975  | 12405   | 14171  | 13325  | 12020  | 19998   | 19814   | 18055  | 14553    | Enriched   | Enriched | Enriched | Enriched | Enriched | NO       |    |
| JQK99Q9R2E2   | Cytosolic endonuclease   | ENDOGAE | 13.134 | 10.3  | 2  | 2  | 2.7054  | 0.00043 | 19400  | 24954  | 18527   | 14851  | 25343  | 15373  | 16863   | 14872   | 12526  | 15353    | Enriched   | Enriched | Enriched | Enriched | Enriched | NO       |    |
| JQK99Q9R2E2   | Cytosolic endonuclease   | ENDOGAE | 11.272 | 8     | 8  | 8  | 14.8827 | 0       | 18542  | 18542  | 18542   | 18542  | 18542  | 18542  | 18542   | 18542   | 18542  | 18542    | Enriched   | Enriched | Enriched | Enriched | Enriched | NO       |    |
| JQK99P4626-5  | Resonance yvonne or ERL1 | ERL1    | 6.7146 | 25.4  | 1  | 1  | 2.6578  | 0.00256 | 5231.1 | 4449.4 | 4648.3  | 3954.8 | 5902.2 | 1672.3 | 2164.1  | 3150.8  | 1830.5 | 3929.5   | Enriched   | Enriched | Enriched | Enriched | Enriched | NO       |    |
| JQK99Q9R2E2   | Cytosolic endonuclease   | ENDOGAE | 15.662 | 7.6   | 1  | 1  | 3.2897  | 0.00078 | 4006.9 | 3435.3 | 3061.5  | 3237.1 | 3578.9 | 3393.7 | 3317    | 3278.3  | 1515.6 | 3651.4   | Enriched   | Enriched | Enriched | Enriched | Enriched | NO       |    |
| JQK99Q9R2E2   | Cytosolic endonuclease   | ENDOGAE | 19.907 | 53.6  | 1  | 1  | 2.4749  | 0.00044 | 15998  | 18216  | 22673   | 9521   | 15662  | 9278.1 | 13590   | 12431   | 10709  | 10862    | Enriched   | Enriched | Enriched | Enriched | Enriched | NO       |    |
| JQK99P4626-5  | Resonance yvonne or ERL1 | ERL1    | 15.277 | 6.4   | 1  | 1  | 1.8542  | 0.00087 | 8875.4 | 3108.9 | 3654.6  | 5911.1 | 5616.2 | 3797.3 | 6172    | 2803.1  | 2271.3 | 3321     | Enriched   | Enriched | Enriched | Enriched | Enriched | NO       |    |
| JQK99P4626-5  | Resonance yvonne or ERL1 | ERL1    | 20.547 | 58.2  | 25 | 6  | 151.16  | 0       | 13140  | 12160  | 12660   | 22520  | 113810 | 142720 | 173150  | 25360   | 36002  | 19920    | Enriched   | Enriched | Enriched | Enriched | Enriched | NO       |    |
| JQK99P4626-5  | Resonance yvonne or ERL1 | ERL1    | 52.541 | 6.7   | 3  | 3  | 5.1227  | 0.00044 | 19171  | 6772.8 | 10943   | 6942.8 | 14100  | 7856   | 7470.5  | 5995.1  | 3687.6 | 7200.2   | Enriched   | Enriched | Enriched | Enriched | Enriched | NO       |    |
| JQK99P4626-5  | Resonance yvonne or ERL1 | ERL1    | 37.911 | 29.47 | 3  | 3  | 4.9578  | 0.00044 | 15767  | 18857  | 12916   | 15149  | 26730  | 11803  | 12904   | 4501.8  | 11677  | Enriched | Enriched   | Enriched | Enriched | Enriched | NO       |          |    |
| JQK99P4626-5  | Resonance yvonne or ERL1 | ERL1    | 11.338 | 14.6  | 17 | 17 | 60.276  | 0       | 55766  | 44227  | 50297   | 39024  | 52848  | 32805  | 61404   | 50009   | 32021  | 52132    | Moderate   | Enriched | Enriched | Enriched | Enriched | NO       |    |
| JQK99P4626-5  | Resonance yvonne or ERL1 | ERL1    | 33.003 | 4.9   | 1  | 1  | 13.345  | 0       | 17012  | 11151  | 12631   | 12324  | 14953  | 14877  | 14191   | 15380   | 8586.4 | 1801.6   | Moderate   | Enriched | Enriched | Enriched | Enriched | NO       |    |
| JQK99P4626-5  | Resonance yvonne or ERL1 | ERL1    | 79.268 | 4.1   | 3  | 3  | 4.4563  | 0.00042 | 44723  | 3574.4 | 4582.6  | 3813.2 | 5890.1 | 7252   | 6627.9  | 6006.2  | 5694.1 | 5812.7   | Moderate   | Enriched | Enriched | Enriched | Enriched | NO       |    |
| JQK99P4626-5  | Resonance yvonne or ERL1 | ERL1    | 37.938 | 4.8   | 5  | 5  | 2.4926  | 0.0002  | 14460  | 16028  | 16183   | 21013  | 12708  | 2122   | 19374   | 17353   | 10222  | 14320    | Enriched   | Enriched | Enriched | Enriched | Enriched | NO       |    |
| JQK99P4626-5  | Resonance yvonne or ERL1 | ERL1    | 45.341 | 5.6   | 2  | 2  | 2.6003  | 0       | 13749  | 12114  | 12577   | 10017  | 14937  | 8817.6 | 15353   | 18897.5 | 12044  | Enriched | Enriched   | Enriched | Enriched | Enriched | NO       |          |    |
| JQK99P4626-5  | Resonance yvonne or ERL1 | ERL1    | 38.728 | 20.9  | 9  | 9  | 23.099  | 0       | 23924  | 15566  | 21467   | 22651  | 24163  | 25287  | 27704   | 25414   | 26410  | 4897.9   | 30884      | Enriched | Enriched | Enriched | Enriched | Enriched | NO |
| JQK99P4626-5  | Resonance yvonne or ERL1 | ERL1    | 50.878 | 2.6   | 1  | 1  | 5.8384  | 0       | 39141  | 31137  | 34556   | 25664  | 24454  | 26000  | 23987   | 19721   | 28990  | 16780    | Moderate   | Enriched | Enriched | Enriched | Enriched | NO       |    |
| JQK99P4626-5  | Resonance yvonne or ERL1 | ERL1    | 79.889 | 0.3   | 2  | 2  | 1.9627  | 0.00080 | 19276  | 48424  | 21280   | 62156  | 34809  | 16828  | 16854   | 28830   | 12465  | 19104    | 14424      | Enriched | Enriched | Enriched | Enriched | Enriched | NO |
| JQK99P4626-5  | Resonance yvonne or ERL1 | ERL1    | 44.609 | 11.6  | 7  | 7  | 13.367  | 0       | 70786  | 44007  | 80775.5 | 10919  | 63188  | 11160  | 11728   | 8407.2  | 3879.3 | 8704.7   | No         | Enriched | Enriched | Enriched | Enriched | Enriched | NO |
| JQK99P4626-5  | Resonance yvonne or ERL1 | ERL1    | 69.948 | 50    | 57 | 48 | 206.52  | 0       | 143770 | 103100 | 12210   | 148380 | 141070 | 227240 | 284000  | 276200  | 150940 | 182400   | No         | Enriched | Enriched | Enriched | Enriched | Enriched | NO |
| JQK99P4626-5  | Resonance yvonne or ERL1 | ERL1    | 102.75 | 15    | 5  | 5  | 16.572  | 0       | 14573  | 12711  | 13376   | 20682  | 43433  | 3457   | 4987.8  | 4987.8  | 4987.8 | 4987.8   | Enriched   | Enriched | Enriched | Enriched | Enriched | NO       |    |
| JQK99P4626-5  | Resonance yvonne or ERL1 | ERL1    | 11.888 | 42    | 9  | 9  | 49.327  | 0       | 13913  | 12346  | 12869   | 12680  | 15248  | 12620  | 10714   | 12587   | 5786.3 | 2101     | 34239      | Moderate | Enriched | Enriched | Enriched | Enriched | NO |
| JQK99P4626-5  | Resonance yvonne or ERL1 | ERL1    | 13.799 | 9.4   | 2  | 2  | 7.6317  | 0       | 35156  | 26238  | 31481   | 35088  | 34196  | 37629  | 36913   | 35643   | 20019  | 34239    | Moderate   | Enriched | Enriched | Enriched | Enriched | Enriched | NO |
| JQK99P4626-5  | Resonance yvonne or ERL1 | ERL1    | 84.229 | 20.4  | 18 | 11 | 45.041  | 0       | 65165  | 64949  | 73073   | 64978  | 85364  | 62126  | 104840  | 57589   | 90832  | 70998    | Enriched   | Enriched | Enriched | Enriched | Enriched | NO       |    |
| JQK99P4626-5  | Resonance yvonne or ERL1 | ERL1    | 18.944 | 5.3   | 1  | 1  | 1.8542  | 0.00087 | 8875.4 | 3108.9 | 3654.6  | 5911.1 | 5616.2 | 3797.3 | 6172    | 2803.1  | 2271.3 | 3321     | Enriched   | Enriched | Enriched | Enriched | Enriched | NO       |    |
| JQK99P4626-5  | Resonance yvonne or ERL1 | ERL1    | 50.052 | 7     | 4  | 4  | 4.7543  | 0       | 10534  | 5047   | 6155.1  | 7897.9 | 8030   | 9533.1 | 10534   | 11007   | 6235.5 | 10980    | Enriched   | Enriched | Enriched | Enriched | Enriched | NO       |    |
| JQK99P4626-5  | Resonance yvonne or ERL1 | ERL1    | 24.385 | 10.3  | 2  | 2  | 2.5839  | 0       | 15459  | 4578.9 | 5916.7  | 2878.8 | 7914   | 3011   | 5239.6  | 2879.2  | 4472.2 | 3396.8   | Enriched   | Enriched | Enriched | Enriched | Enriched | NO       |    |
| JQK99P4626-5  | Resonance yvonne or ERL1 | ERL1    | 30.64  | 4.3   | 1  | 1  | 4.8087  | 0.00042 | 1208   | 6837.2 | 1208    | 6837.2 | 1208   | 6837.2 | 1208    | 6837.2  | 1208   | 6837.2   | Enriched   | Enriched | Enriched | Enriched | Enriched | NO       |    |
| JQK99P4626-5  | Resonance yvonne or ERL1 | ERL1    | 10.688 | 57.3  | 6  | 6  | 6.0023  | 0       | 23730  | 28658  | 24537   | 19312  | 38293  | 28153  | 21591   | 18105   | 12292  | 18538    | Moderate   | Enriched | Enriched | Enriched | Enriched | Enriched | NO |
| JQK99P4626-5  | Resonance yvonne or ERL1 | ERL1    | 55.091 | 6.4   | 2  | 2  | 2.5935  | 0       | 97066  | 37527  | 5223.4  | 14033  | 4539   | 7404.3 | 8406.7  | 13325   | 3830.2 | 9938.1   | Moderate   | Enriched | Enriched | Enriched | Enriched | Enriched | NO |
| JQK99P4626-5  | Resonance yvonne or ERL1 | ERL1    | 95.296 | 31.1  | 34 | 34 | 132.24  | 0       | 207890 | 132970 | 190870  | 21750  | 210900 | 198330 | 2297070 | 312830  | 109730 | 250240   | Enriched   | Enriched | Enriched | Enriched | Enriched | NO       |    |
| JQK99P4626-5  | Resonance yvonne or ERL1 | ERL1    | 12.936 | 15.8  | 23 | 23 | 165.6   | 0       | 196410 | 134690 | 17470   | 18370  | 29200  | 29200  | 29200   | 29200   | 29200  | 29200    | Enriched   | Enriched | Enriched | Enriched | Enriched | NO       |    |
| JQK99P4626-5  | Resonance yvonne or ERL1 | ERL1    | 43.312 | 15    | 7  | 7  | 13.336  | 0       | 17377  | 27322  | 32110   | 42861  | 39888  | 50045  | 36474   | 39213   | 21380  | 4407     | Enriched   | Enriched | Enriched | Enriched | Enriched | NO       |    |
| JQK99P4626-5  | Resonance yvonne or ERL1 | ERL1    | 17.116 | 31.9  | 3  | 3  | 3.17003 | 0       | 10788  | 4801   | 6817    | 15494  | 5595.4 | 12721  | 11366   | 12722   | 4475.9 | 13343    | Enriched   | Enriched | Enriched | Enriched | Enriched | NO       |    |
| JQK99P4626-5  | Resonance yvonne or ERL1 | ERL1    | 50.878 | 2.6   | 1  | 1  | 2.7312  | 0.00239 | 5389.9 | 2712.6 | 3098.3  | 2928   | 2928   | 3790   | 2460    | 2594    | 12394  | 7025.9   | Moderate   | Enriched | Enriched | Enriched | Enriched | Enriched | NO |
| JQK99P4626-5  | Resonance yvonne or ERL1 | ERL1    | 14.056 | 26    | 2  | 2  | 2.7024  | 0       | 12685  | 10151  | 9898.5  | 1535   | 13646  | 11612  | 7461.5  | 8433.1  | 4068.3 | 10997    | Moderate   | Enriched | Enriched | Enriched | Enriched | Enriched | NO |
| JQK99P4626-5  | Resonance yvonne or ERL1 | ERL1    | 30.449 | 18.1  | 36 | 36 | 80.835  | 0       | 145020 | 114720 | 127020  | 114420 | 137280 | 135260 | 141540  | 157100  | 80023  | 13300    | Enriched   | Enriched | Enriched | Enriched | Enriched | NO       |    |
| JQK99P4626-5  | Resonance yvonne or ERL1 | ERL1    | 20.449 | 7.1   | 3  | 3  | 2.8189  | 0.00223 | 11253  | 9324.1 | 10744   | 11407  | 14719  | 19648  | 19175   | 16215   | 13133  | 14810    | Enriched   | Enriched | Enriched | Enriched | Enriched | NO       |    |
| JQK99P4626-5  | Resonance yvonne or ERL1 | ERL1    | 20.449 | 7.1   | 3  | 3  | 2.8189  | 0.00223 | 11253  | 9324.1 | 10744   | 11407  | 14719  | 19648  | 19175   | 16215   | 13133  | 14810    | Enriched</ |          |          |          |          |          |    |

|        |                                            |         |         |      |    |    |          |          |        |        |        |        |        |        |        |        |        |          |          |          |          |          |
|--------|--------------------------------------------|---------|---------|------|----|----|----------|----------|--------|--------|--------|--------|--------|--------|--------|--------|--------|----------|----------|----------|----------|----------|
| 000519 | Fatty-acid amide hydrolase                 | FAAH    | 63.065  | 11.7 | 7  | 7  | 18.537   | 0.9627   | 11693  | 13628  | 12770  | 23287  | 14448  | 9992.4 | 8324   | 6522.7 | 8433.3 | No exons | Moderate | Moderate | Low      | YES      |
| 000554 | von Willebrand factor VWA5A                |         | 86.488  | 13.2 | 12 | 12 | 55.834   | 0.3708   | 27880  | 28600  | 36320  | 33525  | 42327  | 18227  | 25803  | 19997  | 17749  | 25537    | Enriched | Enriched | Enriched | Enriched |
| 030556 | U3 small nuclear ribonucleoprotein         | U3      | 78.431  | 4.1  | 2  | 2  | 6.418    | 0.0008   | 623.6  | 438.6  | 599.3  | 663.9  | 599.3  | 617.0  | 188.3  | 212.4  | 127.62 | Enriched | Moderate | Moderate | Enriched |          |
| 000567 | Nucleolar protein 56                       | NOP56   | 66.049  | 41.2 | 45 | 45 | 22.223   | 0.29620  | 31708  | 28560  | 22940  | 32140  | 31710  | 23220  | 26040  | 11630  | 27520  | Enriched | Enriched | Enriched | Enriched |          |
| 000743 | ATP-dependent RNA decapping                | DDX1    | 53.243  | 4.0  | 10 | 10 | 185.47   | 0.24890  | 10170  | 16550  | 24350  | 18030  | 22450  | 32200  | 34810  | 15530  | 23420  | Enriched | Enriched | Enriched | Moderate |          |
| 000925 | Podocanin                                  | PODCN   | 75.385  | 5.9  | 4  | 4  | 8.9108   | 0.1482   | 9880.6 | 14079  | 11227  | 24814  | 15048  | 15900  | 13539  | 59643  | 15644  | Low      | Enriched | Enriched | Enriched |          |
| 000629 | Importin subunit alpha KPNNA               | IPNA    | 32.786  | 12.1 | 8  | 8  | 23.136   | 0.5956   | 61791  | 55561  | 48624  | 60610  | 29776  | 40091  | 42279  | 22451  | 42926  | Enriched | Enriched | Enriched | Enriched |          |
| 000743 | Serine threonine serine phosphatase        | PPP3C   | 57.832  | 20.5 | 5  | 5  | 4.86269  | 0.2238   | 19610  | 21398  | 22599  | 18965  | 12324  | 32521  | 18899  | 21701  | 17583  | Enriched | Enriched | Enriched | Enriched |          |
| 000754 | Leucine aminopeptidase                     | LEAP1   | 113.411 | 11   | 11 | 11 | 11.4167  | 0.2777   | 91428  | 11177  | 10574  | 96454  | 35473  | 41544  | 52964  | 52444  | 41916  | Enriched | Enriched | Enriched | Enriched |          |
| 000763 | Acetyl-CoA carboxylase ACACB               |         | 255.09  | 3.3  | 6  | 6  | 12.156   | 0.18661  | 14702  | 16748  | 24199  | 18550  | 17254  | 16309  | 18896  | 9951.2 | 24412  | Moderate | Enriched | Enriched | Moderate |          |
| 000764 | Pyridoxal kinase                           | PKDX    | 35.102  | 38.5 | 25 | 25 | 102.72   | 0.12520  | 102350 | 134790 | 111930 | 164190 | 117350 | 155160 | 136240 | 81447  | 119000 | Enriched | Enriched | Enriched | Moderate |          |
| 000767 | Acy-CoA deaminase SCD                      |         | 40.522  | 3.6  | 1  | 1  | 11.147   | 0.14085  | 5685.5 | 4952.7 | 11207  | 54754  | 3252.1 | 3158.6 | 4160   | 2752.1 | 36672  | No exons | No exons | Enriched | Low      |          |
| 014485 | Lipid phosphate phosphatase                | PPP2R   | 35.116  | 4    | 4  | 4  | 67.667   | 0.11700  | 96638  | 69973  | 90681  | 70502  | 11211  | 79728  | 182550 | 35171  | 128210 | Enriched | Enriched | Enriched | Enriched |          |
| 014497 | AT-rich interactive domain                 | ARID1A  | 20.952  | 3.8  | 5  | 5  | 23.997   | 0.14977  | 16435  | 19754  | 18172  | 11805  | 10465  | 16690  | 22383  | 20384  | 14311  | 19965    | Enriched | Enriched | Enriched | Enriched |
| 014588 | Heat shock protein b1 class B              | HSPB6   | 17.135  | 4.0  | 11 | 11 | 31.917   | 0.29775  | 24659  | 33662  | 59940  | 31241  | 35483  | 44175  | 47594  | 25857  | 47219  | Low      | Moderate | Moderate | No exons |          |
| 014595 | Acyl carrier protein 1                     | ACPF1   | 136.065 | 21.1 | 30 | 30 | 80.673   | 0.29330  | 56146  | 80675  | 103320 | 101490 | 76300  | 82906  | 71997  | 62595  | 78499  | Enriched | Enriched | Enriched | Enriched |          |
| 014603 | Head3 complex subunit AP3B1                |         | 13.65   | 11.0 | 15 | 15 | 4.50266  | 0.29028  | 23944  | 28135  | 30372  | 32398  | 49969  | 35839  | 36896  | 29778  | 37799  | Enriched | Enriched | Enriched | Enriched |          |
| 014647 | Chromatin-binding protein                  | CBP1    | 200.56  | 0.6  | 1  | 1  | 2.0937   | 0.00073  | 33212  | 28583  | 30092  | 24743  | 34943  | 1805.3 | 2772   | 2212.4 | 12874  | 1776     | Moderate | Enriched | Enriched | No exons |
| 014656 | Torin-1                                    | TOR1A   | 37.408  | 7.8  | 3  | 3  | 15.006   | 0.16999  | 9659   | 12962  | 32373  | 13982  | 13365  | 15913  | 23236  | 10238  | 22039  | Moderate | Enriched | Enriched | Enriched |          |
| 014657 | Torin-1B                                   | TOR1B   | 37.978  | 6.8  | 3  | 3  | 5.7458   | 0.34375  | 36772  | 3739.6 | 39607  | 35188  | 3505.7 | 11420  | 5178.1 | 9041.9 | 7823.3 | Moderate | Enriched | Enriched | Moderate |          |
| 014672 | Distalrin and metal ADAM10                 |         | 84.141  | 13.8 | 11 | 11 | 26.375   | 0.12026  | 11787  | 11888  | 7708.6 | 14884  | 8219.3 | 14154  | 12344  | 73709  | 12933  | Enriched | Enriched | Enriched | Moderate |          |
| 014732 | Inaam non-muscle tropomyosin               | TROPAC  | 28.311  | 2.2  | 2  | 2  | 240.25   | 0.13210  | 56214  | 59929  | 103660 | 108600 | 124670 | 137300 | 149700 | 37355  | 158030 | Enriched | Enriched | Enriched | Enriched |          |
| 014737 | Programmed cell death 4                    | PCD4    | 14.285  | 36   | 7  | 7  | 14.667   | 0.98129  | 68133  | 7264.4 | 13174  | 76131  | 12330  | 13056  | 35826  | 7926.9 | 12532  | Moderate | Moderate | Enriched | No exons |          |
| 014744 | Protein arginase 1                         | ARG1    | 67.673  | 17   | 13 | 13 | 61.086   | 0.36450  | 18713  | 22236  | 27570  | 25424  | 70292  | 59019  | 78323  | 18910  | 44243  | No exons | Enriched | Enriched | No exons |          |
| 014745 | Nat (N-ethyl) exchange SLC7A9              |         | 12.868  | 39.7 | 20 | 20 | 109.43   | 0.59106  | 55752  | 69032  | 72810  | 79006  | 71811  | 120650 | 116160 | 64877  | 92366  | Enriched | Enriched | Enriched | Enriched |          |
| 014756 | Tetrapeptide repeat                        | TRAPPC2 | 34.405  | 19.3 | 17 | 17 | 43.109   | 0.52279  | 43109  | 48589  | 55219  | 41079  | 48859  | 58219  | 46189  | 28187  | 48949  | Enriched | Enriched | Enriched | Enriched |          |
| 014776 | Transcription coactivator 1                | TCF7L1  | 31.609  | 13.8 | 16 | 16 | 55.693   | 0.87628  | 67040  | 99956  | 61300  | 101300 | 75282  | 54760  | 73146  | 48877  | 80216  | Low      | Enriched | Enriched | Moderate |          |
| 014791 | 3-O-methyltransferase 1                    | APOLI   | 11.268  | 7.9  | 2  | 2  | 24.667   | 0.18699  | 24884  | 27255  | 52814  | 29418  | 36801  | 42582  | 23973  | 31053  | 53075  | Moderate | Low      | Moderate | No exons |          |
| 014802 | DNA-directed RNA polymerase                | POLR2A  | 45.158  | 3.2  | 4  | 4  | 17.178   | 0.2488   | 14576  | 12450  | 11622  | 20951  | 11193  | 13522  | 10173  | 6278.3 | 14077  | Low      | Enriched | Enriched | No exons |          |
| 014818 | Protein 18L2                               |         | 27.887  | 46.7 | 24 | 24 | 118.220  | 0.11820  | 40047  | 47917  | 135094 | 104760 | 128684 | 15910  | 129600 | 14268  | 12808  | Enriched | Enriched | Enriched | Moderate |          |
| 014820 | Serine carrier class SCAMP3                |         | 38.287  | 17.3 | 7  | 7  | 18.424   | 0.14208  | 13772  | 11712  | 22126  | 11666  | 14005  | 11245  | 17536  | 36680  | 11302  | Moderate | Enriched | Enriched | Enriched |          |
| 014824 | 5-oxoprolinase                             | OPALH   | 137.46  | 18.9 | 19 | 19 | 88.114   | 0.58315  | 33392  | 39551  | 62216  | 40099  | 44802  | 40762  | 41818  | 22692  | 49156  | Enriched | Low      | Enriched | Enriched |          |
| 014854 | 2-oxoglutarate decarboxylase               | OGDC    | 27.067  | 4.7  | 6  | 6  | 15.521   | 0.10244  | 24143  | 21413  | 34758  | 33574  | 40187  | 28083  | 50957  | 25249  | 29695  | Enriched | Enriched | Enriched | Enriched |          |
| Q5V980 | Microosomal glutathione S-transferase      | MGST3   | 18.416  | 25.5 | 7  | 7  | 13.492   | 0.24562  | 33742  | 32096  | 13944  | 39888  | 46430  | 40772  | 29116  | 26014  | 29762  | Enriched | Enriched | Enriched | No exons |          |
| 014907 | Tax1-binding protein                       | TAX1BP3 | 13.735  | 13.7 | 1  | 1  | 10.712   | 0.16901  | 10126  | 8760.9 | 18876  | 6099.2 | 10713  | 9280.5 | 17792  | 4985.7 | 17860  | Enriched | Enriched | Enriched | No exons |          |
| 014920 | Inhibitor of nuclear factor kappa-B kinase | IKK2    | 79.908  | 7.6  | 4  | 4  | 14.197   | 0.21406  | 18503  | 19617  | 19931  | 22310  | 18744  | 24906  | 31341  | 29091  | 26061  | Enriched | Moderate | Enriched | Low      |          |
| 014925 | Microtubule-associated protein 1A          | TUBM1   | 28.311  | 2.2  | 3  | 3  | 13.847   | 0.13946  | 13996  | 13996  | 13996  | 13996  | 13996  | 13996  | 13996  | 13996  | 13996  | Enriched | Enriched | Enriched | Enriched |          |
| 014931 | Ubiquitin-conjugating enzyme E2            | UBC2A   | 10.986  | 19.5 | 2  | 2  | 4.8724   | 0.00043  | 2124   | 720.7  | 1098.2 | 3309.2 | 921.81 | 2254.6 | 2010   | 5031   | 955.69 | 2504.2   | Enriched | Enriched | Moderate | Enriched |
| 014936 | b1 casein protein                          | CSK1    | 10.101  | 22.1 | 22 | 22 | 52.264   | 0.88881  | 54864  | 62697  | 104290 | 77856  | 77935  | 87727  | 104650 | 37084  | 76495  | Enriched | Enriched | Enriched | Moderate |          |
| 014939 | ATP-dependent RNA decapping                | DDX1    | 53.243  | 4.0  | 10 | 10 | 185.47   | 0.24890  | 10170  | 16550  | 24350  | 18030  | 22450  | 32200  | 34810  | 15530  | 23420  | Enriched | Enriched | Enriched | Enriched |          |
| 014949 | Cytochrome b-c1                            | CYBC1   | 9.0622  | 23.2 | 3  | 3  | 5.7846   | 0.12327  | 18537  | 8164.9 | 11624  | 19121  | 15279  | 13949  | 10701  | 10782  | 5176.2 | 14208    | Enriched | Enriched | Enriched | Moderate |
| 014964 | Hepatocyte growth factor                   | HGF     | 76.375  | 14.9 | 11 | 11 | 89.772   | 0.30209  | 19144  | 27144  | 27144  | 27144  | 27144  | 29880  | 40888  | 40610  | 22050  | 46983    | Enriched | Enriched | Enriched | Enriched |
| 014974 | ATP-dependent RNA decapping                | PPP3C   | 57.832  | 20.5 | 5  | 5  | 4.86269  | 0.2238   | 19610  | 21398  | 22599  | 18965  | 12324  | 32521  | 18899  | 21701  | 17583  | Enriched | Enriched | Enriched | Enriched |          |
| 014975 | Very low density lipoprotein               | VLDLR   | 64.615  | 6.9  | 6  | 6  | 2.2009   | 0.0972   | 16803  | 22950  | 44507  | 17000  | 22950  | 44507  | 17000  | 22950  | 44507  | 17000    | Enriched | Enriched | Enriched | Enriched |
| 014976 | Cyclin-G-associated G1                     | CCN1    | 143.19  | 11.8 | 18 | 18 | 36.745   | 0.47518  | 35215  | 40168  | 42543  | 49546  | 53467  | 83227  | 65306  | 61147  | 84468  | Enriched | Enriched | Enriched | Enriched |          |
| 014980 | Exportin-1                                 | XPO1    | 12.138  | 30.2 | 41 | 41 | 209.720  | 0.209510 | 144660 | 197540 | 195630 | 178950 | 199130 | 220060 | 300880 | 109400 | 244750 | Enriched | Enriched | Enriched | Enriched |          |
| 015020 | Spectrin beta chain                        | SPTBN2  | 28.311  | 2.2  | 50 | 50 | 26.42025 | 0.16760  | 107010 | 126660 | 118740 | 154580 | 141660 | 134780 | 140800 | 86419  | 120250 | No exons | Low      | Enriched | No exons |          |
| 015031 | Protein RIN                                | RIN2    | 205.12  | 19   | 19 | 19 | 42.556   | 0.22601  | 43260  | 50172  | 54100  | 57234  | 49343  | 48468  | 46061  | 31859  | 51400  | Enriched | Enriched | Enriched | Enriched |          |
| 015032 | Protein RIN                                | RIN1    | 74.533  | 4.3  | 3  | 3  | 6.23251  | 0.6897   | 66122  | 62281  | 56545  | 73138  | 4379.8 | 68101  | 8633   | 6275.4 | 7573.4 | YES      | YES      | YES      | YES      |          |
| 015042 | 2-oxoglutarate decarboxylase               | OGDC    | 27.067  | 4.7  | 18 | 18 | 118.77   | 0.6811   | 54180  | 65542  | 61457  | 72358  | 51104  | 64196  | 69814  | 37041  | 69187  | Enriched | Enriched | Enriched | Enriched |          |
| 015062 | Phosphatidylinositol 4-phosphate 3-kinase  | PIP3K   | 43.549  | 5.9  | 6  | 6  | 6.2009   | 0.13946  | 13996  | 13996  | 13996  | 13996  | 13996  | 13996  | 13996  | 13996  | 13996  | Enriched | Enriched | Enriched | Enriched |          |
| 015067 | Phosphatidylinositol 3-kinase              | PI3K    | 114.73  | 14.3 | 20 | 20 | 63.022   | 0.58414  | 41171  | 52217  | 48811  | 59033  | 41964  | 51148  | 41259  | 28667  | 47941  |          |          |          |          |          |





|                  |                                        |         |      |    |    |          |        |         |         |         |         |         |         |         |         |         |         |            |            |            |            |               |          |     |
|------------------|----------------------------------------|---------|------|----|----|----------|--------|---------|---------|---------|---------|---------|---------|---------|---------|---------|---------|------------|------------|------------|------------|---------------|----------|-----|
| AO4903.ESRGT7E   | Proline synthase co-II PROSC           | 30,344  | 37.5 | 18 | 18 | 96,673   | 0      | 119320  | 67957   | 71315   | 105200  | 83286   | 127940  | 116750  | 135510  | 59264   | 119350  | Enriched   | Enriched   | Enriched   | Moderate   | Enriched      | YES      |     |
| AO4906.ESRHW4    | Erin-2                                 | 37,839  | 48.1 | 25 | 15 | 317,445  | 0      | 220390  | 97487   | 133480  | 232520  | 153020  | 192520  | 215770  | 205570  | 128450  | 255010  | Enriched   | Enriched   | Enriched   | Low        | Enriched      | YES      |     |
| AO4909.220906E   | Pre-miR-143 precursor                  | 102     | 14.3 | 14 | 14 | 59,244   | 0      | 1653    | 27717   | 31194   | 25806   | 27717   | 31194   | 25806   | 31210   | 25995   | 31210   | Moderate   | Enriched   | Enriched   | Enriched   | Enriched      | YES      |     |
| AO4915.HOYX0T    | Protein farn transferase ERLN2         | 339,919 | 1.1  | 3  | 3  | 4,872    | 0.0004 | 6095.8  | 4707.1  | 6396.9  | 5581.2  | 46,645  | 5172.5  | 3338.7  | 521.2   | 102.0   | 65,938  | Enriched   | Enriched   | Enriched   | Enriched   | Enriched      | YES      |     |
| AO4919           | Endonuclease domain EGD5               | 55,016  | 9.8  | 5  | 5  | 28,657   | 0      | 10388   | 8048    | 14828   | 10186   | 14030   | 12945   | 33427   | 20501   | 27881   | 14871   | Moderate   | Moderate   | Moderate   | Moderate   | Moderate      | YES      |     |
| AO4925           | Glutamine dehydrogenase GLO1           | 73,476  | 24.4 | 21 | 2  | 5,594.1  | 0      | 69,765  | 6366.8  | 5780.3  | 5771.9  | 8552.7  | 5676.1  | 7096.3  | 5834.4  | 2704    | 51871   | Moderate   | Enriched   | Enriched   | Enriched   | Enriched      | YES      |     |
| AO4925.3         | Glutamine dehydrogenase GLO1           | 65,459  | 29.8 | 21 | 2  | 5,594.1  | 0      | 11608   | 11890.0 | 11890.0 | 11608   | 11890.0 | 11608   | 11890.0 | 11608   | 11890.0 | 11608   | Enriched   | Enriched   | Enriched   | Enriched   | Enriched      | YES      |     |
| AO4942.2XGR3R3   | Protein SAGIN-AN tag SOGA1             | 103,866 | 1.7  | 2  | 2  | 1,952.9  | 0.008  | 10670   | 5164.5  | 4501.6  | 22784   | 12633   | 5605.4  | 2798.1  | 7612.8  | 14575   | 5986.2  |            |            |            |            |               | YES      |     |
| AO4945           | AP-2 complex subunit AP2A2             | 183,190 | 26.4 | 30 | 7  | 1,055.48 | 0      | 155220  | 120400  | 149070  | 66900   | 160130  | 123840  | 136630  | 162630  | 73653   | 14860   | Enriched   | Enriched   | Enriched   | Enriched   | Enriched      | YES      |     |
| AO4947.3         | AP-2 complex subunit AP2B1             | 71,127  | 21.7 | 21 | 21 | 1,454.5  | 0      | 12993   | 10373   | 13592   | 12089   | 12566   | 11967   | 15005   | 11784   | 7664.6  | 11297   | 5184       | 2742.7     | 2742.7     | 2742.7     | 2742.7        | 2742.7   | YES |
| AO4949.2KTER7Q   | Protein HEXM1/Protein HEXM2/HEXM2      | 40,623  | 5.8  | 2  | 2  | 3,589.9  | 0.0079 | 5337.7  | 7251.2  | 4641.9  | 5110.1  | 6101.2  | 3561.1  | 4214.7  | 5324.4  | 2910.8  | 3984.4  | Enriched   | Moderate   | Moderate   | Enriched   | Enriched      | YES      |     |
| AO5009.5J0594D9  | Tid1 signaling protein TIP3            | 97,486  | 4.4  | 3  | 3  | 130.48   | 0      | 3831    | 2648    | 2703.6  | 3299.1  | 4300.1  | 3671.4  | 6854.9  | 4510.2  | 4012    | 5258.9  | Moderate   | Moderate   | Low        | Moderate   | No express    | YES      |     |
| AO5011.0F908L2   | AH-GAP domain and AGC2                 | 48,962  | 9.1  | 3  | 3  | 5,949.9  | 0      | 10665   | 1304    | 12266   | 15900   | 12011   | 10116   | 16045   | 11699   | 18608   | 12246   | Moderate   | Moderate   | Moderate   | Moderate   | No express    | YES      |     |
| AO5144.08104.2   | Splicing factor SF2A1                  | 125,827 | 4.1  | 4  | 4  | 4,196.1  | 0      | 12993   | 10373   | 13592   | 12089   | 12566   | 11967   | 15005   | 11784   | 7664.6  | 11297   | 5184       | 2742.7     | 2742.7     | 2742.7     | 2742.7        | 2742.7   | YES |
| AO5159.A0A07NF   | NADH dehydrogenase NDUFB6              | 15,459  | 35.9 | 5  | 5  | 25,828   | 0      | 37982   | 24757   | 30657   | 38748   | 38475   | 72126   | 35449   | 31605   | 16505   | 35688   | Enriched   | Enriched   | Enriched   | Enriched   | Low           | YES      |     |
| AO5140           | Mifosin-2 MFN2                         | 86,401  | 4.4  | 3  | 3  | 4,268.8  | 0.0004 | 10735   | 7900.3  | 7790.3  | 11202   | 9431    | 13841   | 16781   | 19412   | 8047.4  | 14106   | Enriched   | Enriched   | Enriched   | Enriched   | Moderate      | YES      |     |
| AO5154           | Alcatraz B1 aldolase AKR2B3            | 37,246  | 19.7 | 3  | 3  | 116.19   | 0      | 19720   | 16490   | 16420   | 16420   | 24700   | 18120   | 16070   | 56270   | 90827   | 29020   | Enriched   | Enriched   | Enriched   | Enriched   | No express    | YES      |     |
| AO5155.3J05155   | Ubiquitin conjugation UBR4B            | 121,882 | 4.2  | 4  | 4  | 17,661   | 0      | 6468.6  | 4003.3  | 5959.3  | 6866    | 6147.3  | 8998.8  | 10064   | 11084   | 11455   | 11500   | Enriched   | Enriched   | Enriched   | Enriched   | Moderate      | YES      |     |
| AO5159           | Zinc finger protein-181 ZFP181         | 34,414  | 9.4  | 3  | 3  | 10,491.9 | 0      | 5542.7  | 3790.4  | 3829.6  | 4781.1  | 8688.5  | 4979    | 6502    | 4171.1  | 3444.7  | 5328.7  | Moderate   | Low        | Moderate   | Enriched   | Enriched      | YES      |     |
| AO5183.0F905167  | NADH dehydrogenase NDUFA3              | 44,662  | 75.6 | 2  | 2  | 2,056.6  | 0      | 9380.3  | 11721   | 8799.4  | 8050.1  | 12994   | 9221.1  | 9002.7  | 7115.3  | 5192.9  | 10999   | Enriched   | Enriched   | Enriched   | Enriched   | No express    | YES      |     |
| AO5183.0F905162  | NADH dehydrogenase NDUFA4              | 15,208  | 7.7  | 3  | 3  | 2,056.6  | 0      | 9380.3  | 11721   | 8799.4  | 8050.1  | 12994   | 9221.1  | 9002.7  | 7115.3  | 5192.9  | 10999   | Enriched   | Enriched   | Enriched   | Enriched   | No express    | YES      |     |
| AO5182.M0R20     | NADH dehydrogenase NDUFA7              | 12,551  | 63.7 | 9  | 9  | 16,648   | 0      | 44089   | 3079    | 34243   | 4441    | 56721   | 22674   | 25364   | 18162   | 21316   | 29932   | Moderate   | Moderate   | Moderate   | Enriched   | Enriched      | YES      |     |
| AO5202           | LETM1 and EF-Hand LETM1                | 83,353  | 18.8 | 21 | 21 | 101.26   | 0      | 88155   | 89222   | 81243   | 70021   | 10021   | 78410   | 104750  | 92494   | 59152   | 110620  | Low        | Moderate   | Moderate   | Enriched   | No express    | YES      |     |
| AO5218.220906E   | Pre-miR-143 precursor                  | 37,839  | 48.1 | 25 | 15 | 317,445  | 0      | 220390  | 97487   | 133480  | 232520  | 153020  | 192520  | 215770  | 205570  | 128450  | 255010  | Enriched   | Enriched   | Enriched   | Enriched   | Enriched      | YES      |     |
| AO5219.FW9713    | Sorting nexin-4 SNX4                   | 51,908  | 10.9 | 4  | 4  | 10,392   | 0      | 6996.8  | 6675.3  | 7370    | 5681.4  | 9474.8  | 5501.1  | 5644.7  | 5970.6  | 3927.6  | 5876.4  | Enriched   | Enriched   | Enriched   | Enriched   | Enriched      | YES      |     |
| AO5251.220906E   | Histone acetyltransferase KAT7         | 58,135  | 7.2  | 3  | 3  | 12,385   | 0      | 18815   | 4671.2  | 5978.9  | 10805   | 4746.1  | 9246.7  | 8139.9  | 10138   | 4531.2  | 9266    |            |            |            |            |               | YES      |     |
| AO5292           | Vesicle-associated mi YAPB             | 27,228  | 26.7 | 8  | 8  | 6,529.87 | 0      | 57711   | 41871   | 61001   | 42689   | 65854   | 47238   | 91211   | 70274   | 37758   | 61287   | Enriched   | Enriched   | Enriched   | Enriched   | Enriched      | YES      |     |
| AO5295           | SNAP25                                 | 143,474 | 10.4 | 11 | 11 | 6,657.8  | 0.0004 | 11657   | 8026.6  | 8026.6  | 11721   | 8026.6  | 11721   | 8026.6  | 11721   | 8026.6  | 11721   | 8026.6     | Enriched   | Enriched   | Enriched   | Enriched      | Enriched | YES |
| AO5308.0F90528.2 | NADH dehydrogenase NDUFC2              | 14,187  | 27.7 | 5  | 5  | 9,357.8  | 0      | 56899   | 3999    | 66603   | 42866   | 64441   | 47647   | 61527   | 17687   | 6389    | 6389    | Enriched   | Enriched   | Enriched   | Enriched   | No expression | YES      |     |
| AO5302.0F90530.2 | Peptidyl nitrilase c1c-2 FKBP3         | 63,083  | 11.6 | 9  | 9  | 14,047   | 0      | 13984   | 11339   | 13703   | 14354   | 13884   | 11070   | 24907   | 17687   | 17687   | 13682   | Enriched   | Enriched   | Enriched   | Enriched   | Enriched      | YES      |     |
| AO5336.M0R20.1   | 6-phosphogluconate PGLS                | 25,547  | 43.8 | 19 | 19 | 7,294.4  | 0      | 70729   | 59152   | 59214   | 63886   | 70954   | 70881   | 62993   | 66077   | 39114   | 63172   | Enriched   | Enriched   | Enriched   | Enriched   | No express    | YES      |     |
| AO5340.0F90540.2 | Biotinidase BTD                        | 69,5    | 34.2 | 69 | 69 | 5        | 0      | 1054314 | 1054314 | 1054314 | 1054314 | 1054314 | 1054314 | 1054314 | 1054314 | 1054314 | 1054314 | Enriched   | Enriched   | Enriched   | Enriched   | Enriched      | YES      |     |
| AO5352.3J059532  | Ubiquitin-like domain FAT2             | 68,617  | 11.6 | 7  | 7  | 29,286   | 0      | 20470   | 11721   | 61793   | 21393   | 17782   | 20871   | 22822   | 52611   | 16582   | 26294   | No express | Low        | Moderate   | No express | No express    | YES      |     |
| AO5363           | Phenylalanine-ribosyl transferase PRTS | 52,356  | 6.7  | 3  | 3  | 3,915.1  | 0.0001 | 15300   | 9417.5  | 14225   | 19744   | 11775   | 15270   | 17217   | 21967   | 17007   | 19087   | Enriched   | Enriched   | Enriched   | Enriched   | Moderate      | YES      |     |
| AO5372.0F90500.0 | Acyltransferase AKR2B3                 | 24,737  | 21.7 | 11 | 11 | 28,818.2 | 0      | 12881   | 11556   | 11222   | 11222   | 1378    | 2551.9  | 8671.9  | 5808    | 18503   | 3808    | 2829       | 2829       | 2829       | 2829       | 2829          | 2829     | YES |
| AO5373           | Importin-7 IPO7                        | 119,52  | 9.4  | 9  | 9  | 24,021   | 0      | 27502   | 22672   | 25106   | 30536   | 26810   | 23808   | 25168   | 28499   | 18965   | 26677   | Enriched   | Enriched   | Enriched   | Enriched   | Enriched      | YES      |     |
| AO5376           | E3 ubiquitin-protein ARH12             | 57,818  | 5.5  | 3  | 3  | 7,873.2  | 0      | 14478   | 8688.5  | 10611   | 14777   | 10617   | 18845   | 12627   | 14561   | 5776.6  | 13384   | Enriched   | Enriched   | Enriched   | Enriched   | Enriched      | YES      |     |
| AO5391           | Pre-miR-143 precursor                  | 66,386  | 2.6  | 1  | 1  | 2,478.8  | 0.0095 | 4309.4  | 4297.6  | 5636.4  | 4199.6  | 6342.9  | 2923.9  | 3984.1  | 1207    | 1262.1  | 3153.3  | Moderate   | Moderate   | Moderate   | Moderate   | No express    | YES      |     |
| AO5404.0F9034.3  | Phenylalanine transferase PRTS         | 59,851  | 6.2  | 3  | 3  | 80,249   | 0      | 12881   | 11556   | 11222   | 11222   | 1378    | 2551.9  | 8671.9  | 5808    | 18503   | 3808    | 2829       | 2829       | 2829       | 2829       | 2829          | 2829     | YES |
| AO5396           | Adenylyltransferase A MCKC3            | 49,669  | 10.2 | 5  | 5  | 9,762.2  | 0      | 33118   | 26311   | 29438   | 31187   | 30646   | 32694   | 33979   | 28376   | 23886   | 3138    | No express | Low        | Moderate   | Low        | Low           | YES      |     |
| AO5408.0F90599.2 | Ureaplasma UTS2                        | 16,276  | 5.8  | 1  | 1  | 3,122.9  | 0.0095 | 4251    | 2337    | 10033   | 2321.3  | 490.87  | 8205    | 8903.3  | 6478    | 3850.8  | 4245.9  | No express | No express | No express | No express | No expression | YES      |     |
| AO5400           | CD3 zeta chain CYZB2B                  | 37,446  | 15.2 | 4  | 4  | 8,246.2  | 0      | 12881   | 11556   | 11222   | 11222   | 1378    | 2551.9  | 8671.9  | 5808    | 18503   | 3808    | 2829       | 2829       | 2829       | 2829       | 2829          | 2829     | YES |
| AO5425.220906E   | Supervillin SVL                        | 20,684  | 5.7  | 7  | 7  | 19,921   | 0      | 27878   | 26418   | 28490   | 24918   | 29324   | 22992   | 32028   | 33182   | 15788   | 22912   | Enriched   | Enriched   | Enriched   | Enriched   | Enriched      | YES      |     |
| AO5427.K2ME62    | GPI ethanolamine pin PGN               | 105,81  | 4.7  | 5  | 5  | 8,154.4  | 0      | 9730.4  | 6617    | 6182.8  | 7114.9  | 8674.7  | 7118.1  | 6095.4  | 6931.1  | 3002.1  | 7565.2  | Moderate   | Moderate   | Enriched   | Enriched   | No express    | YES      |     |
| AO5428.0F90548.2 | Papillin PAPI1                         | 134,84  | 6.3  | 8  | 8  | 14,936   | 0      | 19518   | 17569   | 25963   | 15086   | 34019   | 17652   | 23207   | 24053   | 15495   | 23054   | Moderate   | Moderate   | Moderate   | Low        | No express    | YES      |     |
| AO5433.0F90543.2 | Actin-depolymerizing factor ADF1       | 38,274  | 19.2 | 14 | 14 | 9,575.8  | 0      | 13940   | 10765   | 12400   | 15890   | 14840   | 12740   | 15890   | 14840   | 12740   | 15890   | Enriched   | Enriched   | Enriched   | Enriched   | Enriched      | YES      |     |
| AO5433.2J059453  | Poly(A)-specific RRM1                  | 66,574  | 9.9  | 5  | 5  | 13,041   | 0      | 49859   | 40715   | 41180   | 36838   | 45512   | 38356   | 40457   | 34068   | 14889   | 37253   | Moderate   | Moderate   | Moderate   | Enriched   | Enriched      | YES      |     |
| AO5456.2J059456  | Proteasome assembly PSMN3              | 20,288  | 12   | 5  | 5  | 226.38   | 0      | 12186   | 10937   | 11251   | 7052.3  | 13247   | 14957   | 18447   |         |         |         |            |            |            |            |               |          |     |





|                  |                              |                |         |       |     |     |         |         |        |        |        |        |        |         |         |         |        |          |           |           |           |           |          |     |
|------------------|------------------------------|----------------|---------|-------|-----|-----|---------|---------|--------|--------|--------|--------|--------|---------|---------|---------|--------|----------|-----------|-----------|-----------|-----------|----------|-----|
| P16930:PI6930-2  | Fumarylacetoacetate          | FAH            | 46,374  | 25.1  | 16  | 16  | 36,855  | 50      | 81840  | 54103  | 70010  | 74805  | 69668  | 79952   | 91419   | 95577   | 48470  | 80546    | Moderate  | Low       | Moderate  | Low       | YES      |     |
| P16949:AA2AD0P   | Stathmin                     | STATHN         | 17,302  | 22.8  | 4   | 2   | 9,932   | 8       | 62378  | 77839  | 57194  | 56881  | 68016  | 56671   | 74575   | 70412   | 78565  | 98139    | Enriched  | Moderate  | Enriched  | Enriched  | YES      |     |
| P16959:2P16959-1 | Yeast cytochrome C           | CYC3           | 31,947  | 23.2  | 15  | 28  | 14,478  | 15      | 21070  | 80652  | 67490  | 80979  | 12920  | 94879   | 12237   | 10470   | 5443   | 5084     | Enriched  | Moderate  | Enriched  | Moderate  | YES      |     |
| P17026           | Zinc finger protein 22       | ZFN22          | 25,015  | 26.8  | 6   | 3   | 14,946  | 6       | 43788  | 24188  | 33809  | 25666  | 4259   | 40425   | 32403   | 25782   | 19562  | 33752    | Moderate  | Enriched  | Enriched  | Moderate  | YES      |     |
| P17028           | Zinc finger protein 24       | ZFN24          | 42,155  | 6     | 3   | 2   | 7,0649  | 8       | 95887  | 56206  | 45237  | 10719  | 46013  | 55991   | 70679   | 67079   | 59768  | 90713    | Enriched  | Enriched  | Enriched  | Enriched  | YES      |     |
| P17050           | Alpha-N-acetylvitamin D3     | NAGA           | 46,564  | 102.5 | 5   | 5   | 10,34   | 5       | 34396  | 29139  | 33151  | 24991  | 3371   | 35259   | 38820   | 52493   | 23756  | 46774    | Enriched  | Moderate  | Enriched  | Moderate  | YES      |     |
| P17066           | Heat shock protein 90        | HSP90          | 71,027  | 26.7  | 4   | 4   | 17,037  | 4       | 17039  | 19286  | 18518  | 20599  | 1518   | 35444   | 31241   | 35455   | 46708  | 10550    | Enriched  | Moderate  | Enriched  | Moderate  | YES      |     |
| P17090:PI7096-3  | High mobility group 1        | HMG1A1         | 11,676  | 33.6  | 4   | 4   | 15,992  | 8       | 18645  | 12202  | 16407  | 16140  | 19644  | 16827   | 26776   | 16591   | 13216  | 15792    | Low       | Enriched  | Enriched  | Low       | YES      |     |
| P17152           | Transmembrane protein TMEM11 | TMEM11         | 21,541  | 13.5  | 5   | 5   | 10,968  | 5       | 15191  | 17440  | 29738  | 31111  | 22742  | 17621   | 32603   | 20082   | 20253  | 24822    | Enriched  | Moderate  | Enriched  | Moderate  | YES      |     |
| P17171:PI7174-2  | Amyloid-beta precursor       | APP            | 46,247  | 16.6  | 36  | 36  | 14,650  | 36      | 10240  | 10240  | 10240  | 10240  | 10240  | 10240   | 10240   | 10240   | 10240  | 10240    | Enriched  | Moderate  | Enriched  | Moderate  | YES      |     |
| P17252:J2KRN5    | Protein kinase class II      | PKCIIA         | 76,749  | 15.6  | 9   | 6   | 32,957  | 9       | 37728  | 30642  | 39818  | 32220  | 46981  | 40426   | 66077   | 45274   | 36623  | 43201    | Enriched  | Moderate  | Enriched  | Moderate  | YES      |     |
| P17450:ERPKP7-P  | Nuclear transcription factor | NFYA           | 89,405  | 17.7  | 17  | 17  | 78,398  | 17      | 99437  | 60181  | 69787  | 93883  | 74572  | 80224   | 76313   | 102460  | 51970  | 105850   | Enriched  | Moderate  | Enriched  | Moderate  | YES      |     |
| P17588           | NAADH dehydrogenase          | NDUFB7         | 16,402  | 12.4  | 2   | 2   | 2,693   | 0.00028 | 12891  | 11663  | 11332  | 93033  | 14960  | 10564   | 12567   | 10918   | 5843   | 11728    | No expers | Low       | Enriched  | Moderate  | YES      |     |
| P17613:2P17612-4 | AMP-dependent beta           | PKACCKA2K2     | 39,821  | 14.4  | 6   | 6   | 43,072  | 6       | 65823  | 53144  | 61946  | 63188  | 63491  | 62948   | 79070   | 68965   | 36461  | 64834    | Enriched  | Moderate  | Enriched  | Moderate  | YES      |     |
| P17653:PI7652-3  | Calpain-2 zeta-like          | CAPN2          | 79,940  | 30.7  | 21  | 20  | 100,771 | 21      | 99041  | 61371  | 76612  | 99093  | 94404  | 136760  | 124210  | 142980  | 60155  | 126510   | Enriched  | Moderate  | Enriched  | Enriched  | YES      |     |
| P17661           | Desmin                       | DES            | 53,535  | 24.7  | 21  | 11  | 124,22  | 21      | 36319  | 61931  | 35193  | 28918  | 53797  | 40522   | 42949   | 39792   | 22869  | 62683    | Enriched  | No expers | Low       | Moderate  | YES      |     |
| P17677:PI7677-2  | Neurofilament                | NEFH           | 24,002  | 43.7  | 42  | 35  | 18,25   | 42      | 35     | 18,25  | 42     | 35     | 18,25  | 42      | 35      | 18,25   | 42     | 35       | 18,25     | Enriched  | Moderate  | Enriched  | Moderate | YES |
| P17812:PI7812-2  | CTP synthase 1               | CTPS1          | 66,699  | 7.3   | 6   | 6   | 4,50842 | 0.00044 | 12857  | 18454  | 20,416 | 21914  | 16753  | 16869   | 22223   | 19988   | 1102.6 | 1956.6   | Enriched  | Moderate  | Enriched  | Moderate  | YES      |     |
| P17843:J3KTA4-P1 | Probable ATP-depen           | DDX6           | 89,147  | 30.9  | 27  | 13  | 23,428  | 27      | 50857  | 37061  | 41564  | 55926  | 45447  | 40496   | 38915   | 39136   | 17328  | 14710    | No expers | Enriched  | Enriched  | Enriched  | YES      |     |
| P17858:PI7858-2  | ATP-dependent beta           | PKCL           | 60,108  | 22.3  | 24  | 20  | 284,28  | 24      | 115610 | 83906  | 80236  | 112780 | 95234  | 122900  | 20410   | 180770  | 70781  | 129480   | Enriched  | Moderate  | Enriched  | Enriched  | YES      |     |
| P17960           | Galectin-3                   | GAL3           | 21,538  | 23.8  | 7   | 7   | 11,018  | 7       | 30201  | 19108  | 23409  | 29809  | 1295   | 40964   | 19012   | 32042   | 12130  | 28966    | Enriched  | Enriched  | Enriched  | Enriched  | YES      |     |
| P17931           | Galectin-3                   | GAL3L3         | 26,152  | 34.8  | 17  | 17  | 58,461  | 17      | 161600 | 104990 | 124290 | 191320 | 125210 | 151700  | 257150  | 284110  | 107140 | 189150   | Enriched  | Enriched  | Enriched  | Moderate  | YES      |     |
| RGN0H3:PI79083   | 26S protease regulat         | PSMC3          | 47,352  | 49.4  | 31  | 31  | 155,35  | 31      | 274650 | 20350  | 244250 | 237930 | 257490 | 252310  | 302850  | 252130  | 150790 | 250860   | Enriched  | Moderate  | Enriched  | Moderate  | YES      |     |
| P17907:PI79083   | T-complex protein 1          | TCF1           | 87,343  | 43.7  | 42  | 35  | 18,25   | 42      | 35     | 18,25  | 42     | 35     | 18,25  | 42      | 35      | 18,25   | 42     | 35       | 18,25     | Enriched  | Moderate  | Enriched  | Moderate | YES |
| P18003           | Tyrosine protein kinase      | PTPN1          | 49,966  | 9     | 5   | 5   | 7,6978  | 5       | 47039  | 52466  | 62965  | 56077  | 16367  | 45761   | 61541   | 50831   | 26675  | 54769    | Enriched  | Moderate  | Enriched  | Moderate  | YES      |     |
| P18065           | Insulin-like growth fa       | IGFBP2         | 34,814  | 24.6  | 8   | 8   | 22,986  | 8       | 4703   | 80438  | 58309  | 67116  | 78409  | 53555   | 41145   | 35319   | 24237  | 42761    | No expers | Enriched  | Enriched  | Moderate  | YES      |     |
| P18084:V08374H   | Intran beta-5 integr         | ITGB5          | 89,653  | 6.1   | 3   | 3   | 17,394  | 3       | 30114  | 17431  | 24263  | 36900  | 20554  | 34964   | 30356   | 32344   | 12344  | 36002    | Enriched  | Enriched  | Enriched  | Enriched  | YES      |     |
| P18085:CP0846    | Adenomatous polypos          | APC            | 205,311 | 12.2  | 12  | 12  | 88,488  | 12      | 173330 | 106713 | 123330 | 106713 | 123330 | 106713  | 123330  | 106713  | 123330 | 106713   | Enriched  | Moderate  | Enriched  | Moderate  | YES      |     |
| P18124:AM029     | G05 ribosomal protein        | RPL7           | 22,025  | 21.2  | 37  | 37  | 239,61  | 37      | 255050 | 16430  | 176440 | 274800 | 239880 | 256150  | 221310  | 209970  | 95440  | 183800   | Enriched  | Moderate  | Enriched  | Enriched  | YES      |     |
| P18206:2P18206-2 | Vinculin                     | VCL            | 116,72  | 10.0  | 120 | 120 | 323,31  | 120     | 446680 | 38190  | 416500 | 419730 | 446600 | 569720  | 928550  | 90350   | 41259  | 63070    | Enriched  | Moderate  | Enriched  | Moderate  | YES      |     |
| P18428           | Lipopolysaccharide-b         | LBP            | 55,283  | 14.6  | 9   | 9   | 11,614  | 9       | 60935  | 55017  | 10114  | 11350  | 41950  | 50173   | 51329   | 13700   | 20909  | 97083    | Enriched  | Moderate  | Enriched  | Moderate  | YES      |     |
| P18512:2P18513-3 | Promyelocytic leuke          | PLZF           | 23,212  | 5.3   | 11  | 11  | 2,822   | 0.00002 | 60886  | 54773  | 63184  | 67300  | 73960  | 73600   | 662850  | 608860  | 16602  | 35481    | Enriched  | Moderate  | Enriched  | Moderate  | YES      |     |
| P18615:PI8613-3  | Negative elongation          | NELFE          | 43,239  | 24.7  | 7   | 7   | 23,208  | 7       | 26399  | 18373  | 22388  | 22858  | 24435  | 24675   | 28442   | 27005   | 18257  | 29628    | Enriched  | Moderate  | Enriched  | Enriched  | YES      |     |
| P18609:Q0807     | Phosphotyrosine mi           | PGAM1:PGAM4    | 28,240  | 65.7  | 42  | 42  | 12,467  | 42      | 12700  | 82640  | 30490  | 67980  | 10210  | 38420   | 49670   | 47140   | 27010  | 39350    | Enriched  | Moderate  | Enriched  | Enriched  | YES      |     |
| P18827           | Synaptobrevin                | SNCA           | 22,611  | 12.6  | 1   | 1   | 1,827   | 0.00061 | 10911  | 10911  | 10911  | 10911  | 10911  | 10911   | 10911   | 10911   | 10911  | 10911    | Enriched  | Moderate  | Enriched  | Moderate  | YES      |     |
| P18859:PI8859-2  | ATP synthase complex         | ATP5F          | 12,587  | 5.6   | 19  | 19  | 323,31  | 19      | 151730 | 143500 | 169480 | 127710 | 21830  | 118260  | 132210  | 138560  | 56482  | 142290   | Enriched  | Moderate  | Enriched  | Moderate  | YES      |     |
| P19021:2P19021-2 | Peptidyl diacylase           | ALP            | 96,257  | 4.5   | 4   | 4   | 6,7399  | 4       | 23215  | 20328  | 26769  | 17049  | 29103  | 17393   | 24851   | 15338   | 19866  | 16437    | Enriched  | Moderate  | Enriched  | Enriched  | YES      |     |
| P19075           | Tomapain                     | TSP            | 26,644  | 14.3  | 6   | 6   | 20,533  | 6       | 94254  | 76457  | 11115  | 73960  | 10346  | 20203   | 47753   | 20456   | 29622  | 28822    | Enriched  | Moderate  | Enriched  | Enriched  | YES      |     |
| P19320:2P19320-2 | Vaginal epithelium           | CEACAM6        | 71,258  | 23    | 1   | 1   | 1,827   | 0.00062 | 10911  | 10911  | 10911  | 10911  | 10911  | 10911   | 10911   | 10911   | 10911  | 10911    | Enriched  | Moderate  | Enriched  | Moderate  | YES      |     |
| P19338:PI9337    | Nucleolin                    | NCL            | 76,013  | 38.2  | 78  | 78  | 323,31  | 78      | 761400 | 512300 | 673820 | 617900 | 736000 | 662850  | 1008000 | 999680  | 477900 | 849370   | Enriched  | Moderate  | Enriched  | Enriched  | YES      |     |
| P19397:4P19397-6 | Hexokinase II                | HK2            | 101,108 | 13.6  | 12  | 12  | 22,762  | 12      | 43218  | 3314   | 52662  | 44342  | 54245  | 45309   | 60242   | 67718   | 24452  | 63054    | Enriched  | Moderate  | Enriched  | Moderate  | YES      |     |
| P19387           | DNA-directed RNA             | PCNA           | 37,446  | 29.3  | 7   | 7   | 14,657  | 7       | 14532  | 12767  | 14428  | 11424  | 18483  | 11003   | 15017   | 12346   | 80515  | 15017    | Enriched  | Moderate  | Enriched  | Enriched  | YES      |     |
| P19440:ET7676-P1 | Gamma-tubulin ring           | GM1-GGTP       | 61,409  | 14.8  | 10  | 10  | 19,827  | 10      | 39336  | 34928  | 38005  | 36414  | 42253  | 28058   | 35595   | 31496   | 25805  | 29034    | Enriched  | Moderate  | Enriched  | Enriched  | YES      |     |
| P19474           | E3 ubiquitin protein         | TRIM21         | 54,169  | 6.9   | 3   | 3   | 3,1125  | 0.00044 | 38465  | 2011   | 35922  | 40464  | 40446  | 49538   | 56959   | 56896   | 68267  | 34291    | Moderate  | Moderate  | Enriched  | Moderate  | YES      |     |
| P19524:PI9525-2  | Interferon-induced, 4        | IFIP2A2        | 62,094  | 9.6   | 6   | 6   | 20,461  | 6       | 95200  | 39927  | 47107  | 89380  | 53251  | 33021   | 20959   | 37326   | 18607  | 34299    | Moderate  | Low       | Enriched  | Enriched  | YES      |     |
| P19526           | Galectin-3                   | GAL3L3         | 41,251  | 33.1  | 1   | 1   | 1,827   | 0.00099 | 67201  | 45259  | 61087  | 72131  | 61453  | 89216   | 89624   | 67017   | 67017  | Enriched | Moderate  | Enriched  | Moderate  | YES       |          |     |
| P19623           | Spermidine synthase          | SRM            | 33,824  | 48    | 25  | 25  | 80,661  | 25      | 113340 | 88242  | 88432  | 61421  | 109670 | 118110  | 116650  | 84214   | 51195  | 75253    | Moderate  | Enriched  | Enriched  | Enriched  | YES      |     |
| P19634           | Sodium hydroxase ex          | SLECP1         | 90,762  | 1.7   | 1   | 1   | 3,4915  | 0.00079 | 27999  | 19918  | 22413  | 33332  | 24068  | 24834   | 26602   | 25879   | 12907  | 27132    | Enriched  | Low       | Moderate  | Enriched  | YES      |     |
| P19652           | Alcohol dehydrogenase        | ADH2           | 23,002  | 22.2  | 1   | 1   | 1,827   | 0.00099 | 67201  | 45259  | 61087  | 72131  | 61453  | 89216   | 89624   | 67017   | 67017  | Enriched | Moderate  | Enriched  | Moderate  | YES       |          |     |
| P19827:PI9827-2  | Intra-alpha synu             | ITIH1          | 10,139  | 11.6  | 14  | 14  | 17,212  | 14      | 46593  | 34866  | 43270  | 61074  | 33013  | 52940   | 57233   | 82525   | 36324  | 65627    | Low       | No expers | No expers | No expers | YES      |     |
| XR0888:PI9835-P  | Bile salt-activated lip      | PLA2G2B        | 76,966  | 29.2  | 90  | 90  | 323,31  | 90      | 833940 | 987500 | 585250 | 91470  | 857650 | 1173800 | 1537900 | 1118800 | 92840  | 773530   | Low       | Enriched  | Enriched  | Enriched  | YES      |     |
| P19838:PI9837-2  | Nuclear factor NF-k          | NFKB1          | 95,105  | 12.6  | 16  | 16  | 56,666  | 16      | 34937  | 28425  | 30348  | 32706  | 35193  | 28820   | 26497   | 28386   | 19314  | 29352    | Low       | Enriched  | Enriched  | Enriched  | YES      |     |
| P19966:PI9745-P1 | Adenovirus E1A               | ADP1:ADP2:ADP3 | 57,700  | 18.2  | 11  | 11  | 23,410  | 11      | 23430  | 21427  | 22828  | 23430  | 21427  | 22828   | 23430   | 21427   | 22828  | 23430    | Enriched  | Moderate  | Enriched  | Moderate  | YES      |     |
| P20002:5P20002-1 | Plasma membrane              | ATP2B1         | 129,15  | 9.1   | 15  | 15  | 5,1937  | 15      | 15955  | 10021  | 11304  | 13363  | 16112  | 13673   | 11886   | 11756   | 73838  | 13425    | Enriched  | Low       | Enriched  | Moderate  | YES      |     |
| P20042           | Eukaryotic translation       | EIF2S2         | 38,388  | 58.9  | 38  | 38  | 323,31  | 38      | 43680  | 28600  | 38760  | 34620  | 47030  | 40790   |         |         |        |          |           |           |           |           |          |     |



|          |                                                |                                    |        |        |      |      |         |        |        |         |         |        |        |        |        |        |        |          |           |          |          |               |          |       |
|----------|------------------------------------------------|------------------------------------|--------|--------|------|------|---------|--------|--------|---------|---------|--------|--------|--------|--------|--------|--------|----------|-----------|----------|----------|---------------|----------|-------|
| P8819    | Eukaryotic initiation                          | EIF4A3                             | 46,871 | 35.8   | 24   | 18   | 105.06  | 0      | 86695  | 62294   | 76533   | 85433  | 79648  | 89862  | 183120 | 183010 | 90037  | 103870   | Enriched  | Enriched | Enriched | Moderate      | YES      |       |
| P9019    | AM075B                                         | 40S ribosomal protein RPS19        | 15,066 | 64.8   | 22   | 12   | 100.85  | 0      | 71849  | 46518   | 61044   | 66519  | 14780  | 144000 | 166000 | 131860 | 72340  | 92218    | Enriched  | Enriched | Enriched | Enriched      | YES      |       |
| P9022    | GREB1L3                                        | 60S ribosomal protein RPL10        | 46,108 | 17     | 26.5 | 10.4 | 26.5    | 10.4   | 26530  | 16440   | 21350   | 23760  | 36800  | 24960  | 24960  | 24960  | 24960  | 24960    | 24960     | 24960    | 24960    | 24960         | 24960    | 24960 |
| P9060    | P239060                                        | Collagen alpha-1(OV) COL1A1        | 13,756 | 14.2   | 41   | 41   | 200.73  | 0      | 18078  | 11840   | 15340   | 21700  | 18179  | 20930  | 24600  | 25600  | 32080  | 125130   | 21780     | Enriched | Enriched | Enriched      | Moderate | YES   |
| P9065    | P390520                                        | Dolichyl-diphospho UDPGlc          | 10,25  | 25.9   | 30   | 18   | 141.54  | 0      | 13070  | 7599    | 8981    | 10680  | 10750  | 11120  | 100180 | 9474   | 3228   | 7684     | Enriched  | Enriched | Enriched | Enriched      | YES      |       |
| P9067    | P390520                                        | Acidic leucine rich in ANP2A       | 28,585 | 39     | 20   | 13   | 176.91  | 0      | 13010  | 8282    | 6950    | 17440  | 7629   | 8968   | 13710  | 18390  | 6578   | 10010    | Enriched  | Enriched | Enriched | Enriched      | YES      |       |
| P9074    | Flag                                           | Flag                               | 135    | 135    | 0    | 0    | 7402    | 0      | 2475   | 8402    | 0       | 0      | 0      | 0      | 0      | 0      | 0      | 0        | 0         | 0        | 0        | 0             | 0        | 0     |
| P0122    | EIFEN9P                                        | Macrophage-capping CAPN2           | 38,498 | 32.8   | 15   | 15   | 121.01  | 0      | 10090  | 9168    | 8861    | 8798   | 9799   | 8766   | 11400  | 9486   | 96217  | 11840    | Enriched  | Enriched | Moderate | Low           | YES      |       |
| P0202    | Alpha-tubulin                                  | TUBA                               | 61,89  | 10.6   | 6    | 6    | 50.542  | 0      | 23392  | 2199    | 2819    | 2843   | 2268   | 2511   | 31266  | 24779  | 3305   | 4580     | Moderate  | Low      | Enriched | Low           | YES      |       |
| P0202    | Gamma-tubulin                                  | TUBB                               | 58,022 | 31     | 21   | 21   | 161.02  | 0      | 28120  | 19122   | 22960   | 41880  | 22202  | 43624  | 427340 | 47540  | 16490  | 36690    | Enriched  | Enriched | Enriched | Enriched      | YES      |       |
| P0321    | Nicotinamide N-meth NMMT                       | NM                                 | 29,574 | 19.3   | 5    | 5    | 23.911  | 0      | 7518.1 | 18497   | 8985.5  | 10347  | 10492  | 5315.4 | 7801.1 | 10990  | 785.5  | 2060     | Enriched  | Enriched | Enriched | Moderate      | YES      |       |
| P0313    | Chromovitin-like pr CTRL                       | CTRL                               | 20,020 | 16.7   | 12   | 11   | 15.965  | 0      | 38521  | 29021   | 30112   | 39359  | 40491  | 33831  | 29498  | 28345  | 19120  | 27162    | Moderate  | Enriched | Enriched | Moderate      | YES      |       |
| P0316    | P24061.61                                      | Ubiquitin family class A-RL1       | 18,565 | 39     | 10   | 10   | 64.004  | 0      | 90526  | 38743   | 45021   | 85499  | 50349  | 51501  | 73904  | 112980 | 31402  | 68152    | Enriched  | Enriched | Enriched | Moderate      | YES      |       |
| P0373    | P39075.3                                       | Signal transducer and STAT1        | 83,125 | 28.9   | 25   | 25   | 62.826  | 0      | 90220  | 78277   | 100690  | 129062 | 10978  | 90490  | 92289  | 141380 | 56435  | 11020    | Enriched  | Enriched | Enriched | Enriched      | YES      |       |
| P0381    | P40818.2                                       | AADU ubiquitin carboxyl S-UB       | 12,752 | 7.5    | 7    | 7    | 15.884  | 0      | 10961  | 11040   | 9843.5  | 10556  | 12879  | 94107  | 10198  | 10980  | 7815   | 12215    | No expers | Enriched | Enriched | Low           | YES      |       |
| QOQY5    | P40855.5                                       | Peroxisomal biogenesis PEM19/DCAB8 | 26,317 | 17.9   | 3    | 3    | 8.5151  | 0      | 60732  | 63773.5 | 89433   | 13582  | 10179  | 10313  | 12301  | 12086  | 7501.5 | 14656    | Low       | Moderate | Enriched | Moderate      | YES      |       |
| P40925   | P40925.3                                       | Malate dehydrogenase MDH1          | 36,276 | 42     | 26   | 26   | 178.2   | 0      | 20920  | 14531   | 14700   | 15590  | 29912  | 12816  | 7381   | 82630  | 39406  | 10390    | Enriched  | Enriched | Enriched | Enriched      | YES      |       |
| P40926   | P40926.2                                       | Malate dehydrogenase MDH2          | 25,303 | 60.7   | 50   | 50   | 273.69  | 0      | 355230 | 25410   | 315030  | 370840 | 328030 | 499700 | 659700 | 800580 | 294560 | 491160   | Enriched  | Enriched | Enriched | Enriched      | YES      |       |
| P40937   | P240937.3                                      | Replication factor C - RFC3        | 36,104 | 17.2   | 6    | 6    | 7.259   | 0      | 26175  | 25354   | 29743   | 24854  | 29181  | 29162  | 25836  | 24375  | 12497  | 24750    | Moderate  | Enriched | Moderate | No expression | YES      |       |
| P40939   | Trifunctional enzyme C - HFD3                  | TRIF                               | 82,999 | 51     | 94   | 94   | 323.31  | 0      | 624410 | 401750  | 535210  | 846590 | 590630 | 604880 | 73660  | 983570 | 307270 | 24700    | No expers | Enriched | Enriched | Enriched      | YES      |       |
| P41091   | QV3F3P                                         | Eukaryotic translation EPC3/EIF3L3 | 51,109 | 30     | 20   | 20   | 170.96  | 0      | 20920  | 14531   | 14700   | 15590  | 29912  | 12816  | 7381   | 82630  | 39406  | 10390    | Enriched  | Enriched | Enriched | Enriched      | YES      |       |
| P41208   | Centrin-2                                      | CFIN2                              | 19,738 | 43     | 9    | 9    | 27.75   | 0      | 37047  | 4147    | 42242   | 36982  | 48882  | 23740  | 29849  | 3015   | 16612  | 3846     | Enriched  | Enriched | Enriched | Enriched      | YES      |       |
| P41214   | Q85Y38P                                        | Eukaryotic translation ERF3        | 64,706 | 13.9   | 6    | 6    | 40.801  | 0      | 75298  | 48233   | 54454   | 56411  | 67228  | 80502  | 40656  | 40616  | 26066  | 49564    | Enriched  | Low      | Moderate | Enriched      | YES      |       |
| P41219   | P41219.2                                       | Phospholipase C                    | 53,387 | 37.2   | 28   | 21   | 50.839  | 0      | 119050 | 76072   | 95960   | 112670 | 95083  | 100510 | 110050 | 110050 | 81900  | 169550   | Enriched  | Low      | Moderate | Enriched      | YES      |       |
| P41222   | Prostaglandin-H2 D2                            | PTGHD2                             | 21,029 | 16.3   | 3    | 3    | 7.7308  | 0      | 47689  | 23231   | 26902   | 32515  | 23112  | 24198  | 26725  | 25176  | 14038  | 26962    | No expers | Enriched | Enriched | Enriched      | YES      |       |
| P41227   | P41227.2                                       | N-Alpha-acetyltransferase NAA10    | 26,458 | 35.3   | 11   | 11   | 42.132  | 0      | 47699  | 38408   | 35335   | 25464  | 48789  | 44312  | 42033  | 42018  | 12267  | 35369    | Enriched  | Enriched | Enriched | Enriched      | YES      |       |
| P41240   | Tyrosine protein kinase C                      | TKC                                | 50,743 | 7.1    | 3    | 3    | 6.7236  | 0      | 82397  | 5983.8  | 7787.8  | 8979.2 | 6994.9 | 8551.9 | 8592.6 | 7289.2 | 5644.2 | 6599.6   | Enriched  | Moderate | Moderate | Enriched      | YES      |       |
| P41250   | Glyceraldehyde-3-phosphate dehydrogenase GAPDH | GAPDH                              | 44,728 | 47.8   | 47   | 47   | 235.728 | 0      | 219220 | 13210   | 16328   | 21400  | 24533  | 44810  | 49620  | 62820  | 24700  | 29700    | Enriched  | Moderate | Moderate | No expers     | YES      |       |
| P41743   | Q05513.2                                       | Protein kinase C zeta              | PKCZ   | 10,745 | 21   | 2    | 2       | 20.106 | 0      | 14172   | 83128   | 12575  | 28722  | 81748  | 16051  | 14326  | 2534.7 | 10649    | 17552     | Enriched | Enriched | Enriched      | Low      | YES   |
| P42025   | Beta-actin                                     | ACTB                               | 42,262 | 24.2   | 15   | 15   | 161.59  | 0      | 95612  | 62994   | 70564   | 64400  | 76840  | 98318  | 69504  | 51343  | 34643  | 72552    | Enriched  | Enriched | Enriched | Enriched      | YES      |       |
| P42126   | P42126.2                                       | Small ribosomal subunit            | 23,816 | 29.82  | 19   | 19   | 62.826  | 0      | 75890  | 45303   | 100690  | 129062 | 10978  | 90490  | 92289  | 141380 | 56435  | 11020    | Enriched  | Enriched | Enriched | Enriched      | YES      |       |
| P42166   | Lamina-associated po TMO                       | LAMP1                              | 75,491 | 21     | 18   | 18   | 5.8692  | 0      | 16553  | 12394   | 19539   | 20941  | 17744  | 14494  | 15621  | 21501  | 14264  | 20567    | Enriched  | Enriched | Enriched | No expers     | YES      |       |
| P42172   | P42172.617                                     | Lamina-associated po TMO           | 50,677 | 37.4   | 27   | 27   | 95.53   | 0      | 187320 | 127530  | 181060  | 117490 | 22140  | 124470 | 170410 | 180380 | 114550 | 14240    | Moderate  | Enriched | Enriched | No expers     | YES      |       |
| P42217   | P42217.617                                     | Lamina-associated po TMO           | 50,677 | 37.4   | 27   | 27   | 95.53   | 0      | 187320 | 127530  | 181060  | 117490 | 22140  | 124470 | 170410 | 180380 | 114550 | 14240    | Moderate  | Enriched | Enriched | No expers     | YES      |       |
| P42224   | JH3MP9P                                        | Signal transducer and STAT1        | 87,334 | 17.9   | 14   | 14   | 33.244  | 0      | 65667  | 61122   | 77750   | 76572  | 80866  | 60157  | 77831  | 86722  | 42080  | 71554    | Enriched  | Enriched | Enriched | Enriched      | YES      |       |
| P42226   | P24226.2                                       | Signal transducer and STAT6        | 74,456 | 9.1    | 5    | 5    | 8.049   | 0      | 28437  | 28464   | 28755   | 22666  | 30669  | 21403  | 30394  | 28602  | 21149  | 29920    | Enriched  | Enriched | Enriched | Enriched      | YES      |       |
| P42285   | Superoxide dismutase SKIVL2                    | SKIVL2                             | 117.8  | 15.8   | 16   | 16   | 29.395  | 0      | 43448  | 29623   | 39431   | 50439  | 38479  | 41297  | 48358  | 58864  | 22605  | 51388    | Enriched  | Enriched | Enriched | Low           | YES      |       |
| P42330.2 | Akaryotic translation EPC3                     | EPC3                               | 23,946 | 39.7   | 14   | 14   | 61.856  | 0      | 14099  | 36611   | 47999   | 59121  | 21216  | 10411  | 12426  | 16894  | 20943  | Enriched | Enriched  | Enriched | Enriched | YES           |          |       |
| P42345   | Phosphatidylinositol 3-OH Phosphatidylinositol | PIP3                               | 12,776 | 3.5    | 4    | 4    | 10.276  | 0      | 14253  | 6592    | 8288    | 10828  | 13211  | 13818  | 13172  | 12388  | 66001  | 11382    | Moderate  | Enriched | Enriched | Moderate      | YES      |       |
| Q23445   | Serine threonine-ester M2OR                    | STOR                               | 28,889 | 28     | 7    | 7    | 15.312  | 0      | 15540  | 16071   | 14646   | 14559  | 14547  | 14408  | 14151  | 21235  | 7781.1 | 14716    | Moderate  | Low      | Moderate | Enriched      | YES      |       |
| P42565   | BLUHL8                                         | Eukaryotic translation ERF3        | 60,485 | 7.5    | 5    | 5    | 18.607  | 0      | 28520  | 29514   | 21507   | 20062  | 23444  | 19424  | 20908  | 28800  | 11172  | 20908    | Enriched  | Enriched | Enriched | Enriched      | YES      |       |
| P42614   | P42617                                         | 40S ribosomal protein RPS27        | 7,3564 | 39.7   | 27   | 27   | 38.006  | 0      | 80532  | 65691   | 72838   | 67357  | 94227  | 79857  | 116050 | 92600  | 45960  | 65900    | Enriched  | Enriched | Enriched | Enriched      | YES      |       |
| P42704   | Leucine-rich PRR mo LRRPC2                     | LRRPC2                             | 157.9  | 38     | 76   | 76   | 323.21  | 0      | 502740 | 386010  | 447040  | 428880 | 508530 | 404070 | 439210 | 51670  | 21000  | 40770    | Enriched  | Enriched | Enriched | Enriched      | YES      |       |
| P42765   | KTEMD                                          | Cysteine-Cys/CoA tRNA              | 41,924 | 43.8   | 28   | 28   | 28.226  | 0      | 187970 | 136400  | 160080  | 191880 | 186350 | 147230 | 27350  | 32210  | 100590 | 21090    | No expers | Enriched | Enriched | Enriched      | YES      |       |
| P42766   | P27288                                         | 60S ribosomal protein RPL10        | 44,551 | 51.2   | 17   | 17   | 85.874  | 0      | 219090 | 136400  | 160080  | 191880 | 186350 | 147230 | 27350  | 32210  | 100590 | 21090    | No expers | Enriched | Enriched | Enriched      | YES      |       |
| P42773   | Cylin-dependent kinase C                       | CDKN2C                             | 18,127 | 28     | 4    | 4    | 23.805  | 0      | 5487.6 | 25527   | 34715   | 7223.4 | 24718  | 4556   | 42743  | 5700.5 | 3071.2 | 1880     | Low       | Moderate | Enriched | Enriched      | YES      |       |
| P42786   | P24278.2                                       | Lysosomal Pn. Ca cap PRCP          | 55,759 | 48     | 2    | 2    | 24.61   | 0      | 18003  | 10380   | 16612   | 10431  | 23667  | 11292  | 12673  | 14689  | 5091.1 | 1181     | Enriched  | Enriched | Enriched | Moderate      | YES      |       |
| P42802   | P24802.2                                       | Eukaryotic translation ERF3        | 85,307 | 11.2   | 5    | 5    | 21.42   | 0      | 12811  | 7821    | 63179.3 | 14073  | 794    | 7714.4 | 5469.9 | 9073.6 | 2756   | 1202     | Enriched  | Enriched | Moderate | No expers     | YES      |       |
| P43004   | P34304.0                                       | Excitatory amino acid SLC1A2       | 61,007 | 10.8   | 6    | 6    | 12.163  | 0      | 97181  | 68443   | 79643   | 66218  | 11209  | 9121.5 | 13303  | 9100.1 | 5658   | 11602    | Low       | Enriched | Moderate | No expers     | YES      |       |
| P43007   | Neutral amino acid SLC1A1A                     | SLC1A1A                            | 57,0   |        |      |      |         |        |        |         |         |        |        |        |        |        |        |          |           |          |          |               |          |       |

|        |                                                    |        |      |     |    |         |          |         |         |         |         |         |         |         |         |          |           |           |           |           |          |
|--------|----------------------------------------------------|--------|------|-----|----|---------|----------|---------|---------|---------|---------|---------|---------|---------|---------|----------|-----------|-----------|-----------|-----------|----------|
| P50135 | Histamine N-methyl HNMT                            | 33,295 | 21.6 | 10  | 10 | 27,644  | 0.2586   | 18424   | 25619   | 25364   | 26263   | 20121   | 58839   | 90564   | 28473   | 37514    | Moderate  | Enriched  | Enriched  | Low       | YES      |
| P01401 | 4-aminobiphenyl-3-amine                            | 42,142 | 27.3 | 14  | 5  | 16,179  | 0.1518   | 12226   | 16068   | 18288   | 19560   | 23327   | 22508   | 12833   | 19233   | Enriched | Enriched  | Enriched  | Low       | YES       |          |
| P02113 | 3-Hydroxy-2-pyridone                               | 39,591 | 30.1 | 12  | 5  | 12,777  | 0.2350   | 15588   | 17719   | 15588   | 17719   | 15588   | 17719   | 15588   | 17719   | 15588    | 17719     | Moderate  | Enriched  | Enriched  | Low      |
| P00228 | HBRVY5F Sulfonamidease 1A1_SULT1A1                 | 34,165 | 23.7 | 6   | 2  | 16,188  | 0.2076   | 10267   | 25166   | 17026   | 15893   | 14785   | 30349   | 17380   | 20389   | Enriched | Enriched  | Enriched  | Moderate  | YES       |          |
| P00238 | KADBP9H Cysteine-rich protein CRP1                 | 8,528  | 32.5 | 2   | 1  | 3,120   | 0.00095  | 6473    | 24814   | 4098.3  | 1188    | 5663.7  | 1332.9  | 8047.2  | 4769.3  | 6585.9   | 1589.5    | Enriched  | No exress | Low       | YES      |
| P00353 | PSJH135F Prothymosin- $\alpha$ PTM3                | 80,766 | 8.2  | 5   | 5  | 7,392   | 0.1900   | 19657   | 20401   | 20284   | 23617   | 14136   | 22141   | 26996   | 15809   | 22386    | Enriched  | Moderate  | Moderate  | Moderate  |          |
| P00379 | PSJH262.2-Rubredoxin-associated protein 2          | 90,663 | 73.7 | 8   | 4  | 3,201   | 0.00077  | 11720   | 10474   | 16287   | 11976   | 67610   | 49700   | 71430   | 98700   | 91870    | 11870     | Enriched  | No exress | Enriched  | Low      |
| P04012 | QHYH37 Erimin                                      | 28,940 | 23.6 | 7   | 7  | 10,791  | 0.1887   | 15026   | 20044   | 17566   | 22819   | 14148   | 17230   | 19826   | 14848   | 18955    | Enriched  | Moderate  | Moderate  | Enriched  |          |
| P04016 | 90404.06016-2 Carnitine O-palmitoyl transferase II | 88,367 | 18.2 | 15  | 15 | 26,641  | 0.1594   | 42031   | 46332   | 46778   | 55011   | 49711   | 61260   | 54440   | 28475   | 58005    | Enriched  | Enriched  | Enriched  | Moderate  |          |
| P04019 | 90404.06016-3 Glycine amidotransferase GATM        | 46,465 | 12.5 | 15  | 15 | 12,011  | 0.00077  | 11720   | 10474   | 16287   | 11976   | 67610   | 49700   | 71430   | 98700   | 91870    | 11870     | Enriched  | No exress | Enriched  | Low      |
| P04042 | Glycine amidotransferase GATM                      | 44,883 | 81.3 | 126 | 2  | 3,233.1 | 0.156200 | 1190700 | 1147700 | 1788200 | 1577000 | 1579000 | 1854000 | 2112500 | 821040  | 1522300  | Moderate  | Enriched  | Enriched  | Enriched  |          |
| P04053 | Serpin B9 SERPBN9                                  | 42,403 | 6.4  | 2   | 2  | 2,747   | 0.0024   | 11806   | 1195    | 1453.9  | 967.43  | 1312.2  | 1390.9  | 1194    | 1374.1  | 470.98   | 1107.8    | Enriched  | Low       | Moderate  | Enriched |
| P04054 | 5E9PPV6-E Serpin H1 SERP1NH1                       | 46,446 | 31.3 | 18  | 11 | 81,753  | 0.7807   | 72056   | 74647   | 91684   | 78611   | 67415   | 75914   | 115360  | 38743   | 85700    | No exress | Low       | Enriched  | Enriched  |          |
| P04056 | 5E9PPV6-2 PEG and alpha domain PEG1                | 20,478 | 11.2 | 3   | 3  | 12,011  | 0.1887   | 15026   | 20044   | 17566   | 22819   | 14148   | 17230   | 19826   | 14848   | 18955    | Enriched  | No exress | Moderate  | No exress |          |
| P05020 | QKXN66-Hc70-interacting protein ST13T31P35-ST13P4  | 41,331 | 22.5 | 15  | 15 | 17,679  | 0.7101   | 43667   | 44956   | 7077    | 56883   | 81588   | 84880   | 102610  | 27284   | 52192    | Enriched  | Enriched  | Enriched  | Enriched  |          |
| P05052 | Vasodilator-stimulate VASP                         | 59,829 | 28.7 | 10  | 10 | 16,134  | 0.2574   | 19653   | 23388   | 35563   | 27354   | 19917   | 19495   | 23295   | 13784   | 23789    | Enriched  | Moderate  | Enriched  | Low       |          |
| P05075 | PSJH5701 Dynamin-2 DNML2                           | 37,445 | 19   | 28  | 2  | 8,224.5 | 0.10740  | 73002   | 90746   | 96821   | 10052   | 10650   | 153000  | 102570  | 138700  | Moderate | Enriched  | Moderate  | Enriched  |           |          |
| P05079 | PSJH579-3 Methionine aminopeptidase 2              | 32,891 | 41.2 | 27  | 27 | 241.98  | 0.15020  | 1151000 | 1126300 | 1162300 | 1675000 | 1146000 | 1673200 | 1319700 | 1446200 | 1244800  | Low       | Enriched  | Enriched  | No exress |          |
| P05083 | Bio5-mucopolysaccharide NUDT2                      | 16,829 | 33.3 | 5   | 5  | 12,221  | 0.2641   | 34789   | 33351   | 44285   | 42473   | 853.29  | 1397.4  | 1338.6  | 795.98  | 2098.8   | Moderate  | Low       | Moderate  | No exress |          |
| P05084 | Lipopolysaccharide LBR4                            | 31,911 | 14.3 | 47  | 0  | 258.86  | 0.228470 | 187070  | 209550  | 173720  | 316220  | 188890  | 209780  | 176940  | 105100  | 198340   | Enriched  | Enriched  | Enriched  | Enriched  |          |
| P05085 | AAOAM7B Basic fibroblast growth factor 7           | 67,408 | 22   | 20  | 7  | 69349   | 49739    | 69164   | 68824   | 69266   | 64464   | 75977   | 80966   | 86255   | Low     | Enriched | Moderate  | Moderate  | Enriched  |           |          |
| P05087 | EPHAE8E Palmitoyl-protein thyl PPT1                | 34,193 | 34.6 | 17  | 17 | 10,117  | 0.6662   | 55886   | 56657   | 75138   | 87460   | 96338   | 94946   | 74116   | 91004   | 114120   | Enriched  | Enriched  | Enriched  | Enriched  |          |
| P05091 | 4E1TEP83 60S ribosomal protein RPL14               | 23,432 | 39.1 | 18  | 18 | 46,282  | 0.8566   | 43083   | 42347   | 41508   | 69928   | 61877   | 106260  | 124940  | 114900  | 60424    | Enriched  | Enriched  | Enriched  | Enriched  |          |
| P05092 | 2P509091T T-complex protein 1 CCT1                 | 57,465 | 53.1 | 51  | 51 | 32,331  | 0.20260  | 181020  | 186600  | 224240  | 222220  | 230950  | 38019   | 36924   | 195330  | 251290   | Enriched  | Enriched  | Enriched  | Enriched  |          |
| P05093 | 2P50909-2 T-complex protein 1 CCT4                 | 57,924 | 30.7 | 37  | 37 | 98,433  | 0.10370  | 75733   | 92575   | 92254   | 110400  | 88826   | 112330  | 73627   | 95574   | 87015    | Enriched  | Enriched  | Enriched  | Enriched  |          |
| P05095 | 2P50905 Annexin A11 ANXA11                         | 51,242 | 33.9 | 23  | 21 | 150.32  | 0.12070  | 88986   | 111000  | 126960  | 113800  | 145790  | 188000  | 259260  | 92468   | 18891    | Enriched  | Enriched  | Enriched  | Enriched  |          |
| P05116 | FRANK E mental retic RAB2                          | 74,222 | 8.3  | 7   | 7  | 49,718  | 0.1322   | 11564   | 11229   | 10054   | 12779   | 11185   | 19288   | 12067   | 20426   | 17351    | Moderate  | Moderate  | Enriched  | Enriched  |          |
| P05118 | PSJH145.21-265 protein associated with RAB3        | 23,482 | 21.3 | 14  | 14 | 7,827.7 | 0.1991   | 41074   | 16287   | 11976   | 67610   | 49700   | 71430   | 98700   | 91870   | 11870    | Enriched  | No exress | Enriched  | Low       |          |
| P05119 | PSJH145.21-265 protein associated with RAB3        | 23,482 | 21.3 | 14  | 14 | 7,827.7 | 0.1991   | 41074   | 16287   | 11976   | 67610   | 49700   | 71430   | 98700   | 91870   | 11870    | Enriched  | No exress | Enriched  | Low       |          |
| P05119 | PSJH145.21-265 protein associated with RAB3        | 23,482 | 21.3 | 14  | 14 | 7,827.7 | 0.1991   | 41074   | 16287   | 11976   | 67610   | 49700   | 71430   | 98700   | 91870   | 11870    | Enriched  | No exress | Enriched  | Low       |          |
| P05119 | PSJH145.21-265 protein associated with RAB3        | 23,482 | 21.3 | 14  | 14 | 7,827.7 | 0.1991   | 41074   | 16287   | 11976   | 67610   | 49700   | 71430   | 98700   | 91870   | 11870    | Enriched  | No exress | Enriched  | Low       |          |
| P05119 | PSJH145.21-265 protein associated with RAB3        | 23,482 | 21.3 | 14  | 14 | 7,827.7 | 0.1991   | 41074   | 16287   | 11976   | 67610   | 49700   | 71430   | 98700   | 91870   | 11870    | Enriched  | No exress | Enriched  | Low       |          |
| P05119 | PSJH145.21-265 protein associated with RAB3        | 23,482 | 21.3 | 14  | 14 | 7,827.7 | 0.1991   | 41074   | 16287   | 11976   | 67610   | 49700   | 71430   | 98700   | 91870   | 11870    | Enriched  | No exress | Enriched  | Low       |          |
| P05119 | PSJH145.21-265 protein associated with RAB3        | 23,482 | 21.3 | 14  | 14 | 7,827.7 | 0.1991   | 41074   | 16287   | 11976   | 67610   | 49700   | 71430   | 98700   | 91870   | 11870    | Enriched  | No exress | Enriched  | Low       |          |
| P05119 | PSJH145.21-265 protein associated with RAB3        | 23,482 | 21.3 | 14  | 14 | 7,827.7 | 0.1991   | 41074   | 16287   | 11976   | 67610   | 49700   | 71430   | 98700   | 91870   | 11870    | Enriched  | No exress | Enriched  | Low       |          |
| P05119 | PSJH145.21-265 protein associated with RAB3        | 23,482 | 21.3 | 14  | 14 | 7,827.7 | 0.1991   | 41074   | 16287   | 11976   | 67610   | 49700   | 71430   | 98700   | 91870   | 11870    | Enriched  | No exress | Enriched  | Low       |          |
| P05119 | PSJH145.21-265 protein associated with RAB3        | 23,482 | 21.3 | 14  | 14 | 7,827.7 | 0.1991   | 41074   | 16287   | 11976   | 67610   | 49700   | 71430   | 98700   | 91870   | 11870    | Enriched  | No exress | Enriched  | Low       |          |
| P05119 | PSJH145.21-265 protein associated with RAB3        | 23,482 | 21.3 | 14  | 14 | 7,827.7 | 0.1991   | 41074   | 16287   | 11976   | 67610   | 49700   | 71430   | 98700   | 91870   | 11870    | Enriched  | No exress | Enriched  | Low       |          |
| P05119 | PSJH145.21-265 protein associated with RAB3        | 23,482 | 21.3 | 14  | 14 | 7,827.7 | 0.1991   | 41074   | 16287   | 11976   | 67610   | 49700   | 71430   | 98700   | 91870   | 11870    | Enriched  | No exress | Enriched  | Low       |          |
| P05119 | PSJH145.21-265 protein associated with RAB3        | 23,482 | 21.3 | 14  | 14 | 7,827.7 | 0.1991   | 41074   | 16287   | 11976   | 67610   | 49700   | 71430   | 98700   | 91870   | 11870    | Enriched  | No exress | Enriched  | Low       |          |
| P05119 | PSJH145.21-265 protein associated with RAB3        | 23,482 | 21.3 | 14  | 14 | 7,827.7 | 0.1991   | 41074   | 16287   | 11976   | 67610   | 49700   | 71430   | 98700   | 91870   | 11870    | Enriched  | No exress | Enriched  | Low       |          |
| P05119 | PSJH145.21-265 protein associated with RAB3        | 23,482 | 21.3 | 14  | 14 | 7,827.7 | 0.1991   | 41074   | 16287   | 11976   | 67610   | 49700   | 71430   | 98700   | 91870   | 11870    | Enriched  | No exress | Enriched  | Low       |          |
| P05119 | PSJH145.21-265 protein associated with RAB3        | 23,482 | 21.3 | 14  | 14 | 7,827.7 | 0.1991   | 41074   | 16287   | 11976   | 67610   | 49700   | 71430   | 98700   | 91870   | 11870    | Enriched  | No exress | Enriched  | Low       |          |
| P05119 | PSJH145.21-265 protein associated with RAB3        | 23,482 | 21.3 | 14  | 14 | 7,827.7 | 0.1991   | 41074   | 16287   | 11976   | 67610   | 49700   | 71430   | 98700   | 91870   | 11870    | Enriched  | No exress | Enriched  | Low       |          |
| P05119 | PSJH145.21-265 protein associated with RAB3        | 23,482 | 21.3 | 14  | 14 | 7,827.7 | 0.1991   | 41074   | 16287   | 11976   | 67610   | 49700   | 71430   | 98700   | 91870   | 11870    | Enriched  | No exress | Enriched  | Low       |          |
| P05119 | PSJH145.21-265 protein associated with RAB3        | 23,482 | 21.3 | 14  | 14 | 7,827.7 | 0.1991   | 41074   | 16287   | 11976   | 67610   | 49700   | 71430   | 98700   | 91870   | 11870    | Enriched  | No exress | Enriched  | Low       |          |
| P05119 | PSJH145.21-265 protein associated with RAB3        | 23,482 | 21.3 | 14  | 14 | 7,827.7 | 0.1991   | 41074   | 16287   | 11976   | 67610   | 49700   | 71430   | 98700   | 91870   | 11870    | Enriched  | No exress | Enriched  | Low       |          |
| P05119 | PSJH145.21-265 protein associated with RAB3        | 23,482 | 21.3 | 14  | 14 | 7,827.7 | 0.1991   | 41074   | 16287   | 11976   | 67610   | 49700   | 71430   | 98700   | 91870   | 11870    | Enriched  | No exress | Enriched  | Low       |          |
| P05119 | PSJH145.21-265 protein associated with RAB3        | 23,482 | 21.3 | 14  | 14 | 7,827.7 | 0.1991   | 41074   | 16287   | 11976   | 67610   | 49700   | 71430   | 98700   | 91870   | 11870    | Enriched  | No exress | Enriched  | Low       |          |
| P05119 | PSJH145.21-265 protein associated with RAB3        | 23,482 | 21.3 | 14  | 14 | 7,827.7 | 0.1991   | 41074   | 16287   | 11976   | 67610   | 49700   | 71430   | 98700   | 91870   | 11870    | Enriched  | No exress | Enriched  | Low       |          |
| P05119 | PSJH145.21-265 protein associated with RAB3        | 23,482 | 21.3 | 14  | 14 | 7,827.7 | 0.1991   | 41074   | 16287   | 11976   | 67610   | 49700   | 71430   | 98700   | 91870   | 11870    | Enriched  | No exress | Enriched  | Low       |          |
| P05119 | PSJH145.21-265 protein associated with RAB3        | 23,482 | 21.3 | 14  | 14 | 7,827.7 | 0.1991   | 41074   | 16287   | 11976   | 67610   | 49700   | 71430   | 98700   | 91870   | 11870    | Enriched  | No exress | Enriched  | Low       |          |







|                                                        |                                                          |        |      |    |         |         |        |         |         |        |        |        |         |        |        |          |           |           |           |           |          |       |
|--------------------------------------------------------|----------------------------------------------------------|--------|------|----|---------|---------|--------|---------|---------|--------|--------|--------|---------|--------|--------|----------|-----------|-----------|-----------|-----------|----------|-------|
| Q13045-2013045: Protein flightless-1b FLII             | 138.49                                                   | 14     | 19   | 19 | 61.838  | 0       | 73591  | 55509   | 67644   | 73112  | 82323  | 70342  | 86807   | 88942  | 48145  | 80516    | Enriched  | Enriched  | Enriched  | Moderate  | YES      |       |
| Q13049                                                 | E3 ubiquitin-protein TRIM23                              | 71.988 | 1.7  | 1  | 2.1359  | 0.0061  | 11777  | 3494.9  | 3974.2  | 13852  | 50881  | 82389  | 6323    | 5027.9 | 2174.3 | 62721    | Low       | Moderate  | Enriched  | Enriched  | YES      |       |
| Q13057-013057:2: Ribonuclease H1                       | 62.238                                                   | 29.1   | 19   | 19 | 0.0000  | 0       | 19170  | 56230   | 48604   | 60238  | 65239  | 60238  | 66732   | 65188  | 71951  | 69284    | Enriched  | Enriched  | Enriched  | Enriched  | YES      |       |
| Q13057-2013087: Protein disulfide-isomerase PDIA2      | 57.849                                                   | 41.4   | 60   | 13 | 3.3231  | 0       | 474810 | 471090  | 670820  | 591850 | 909660 | 584030 | 1242700 | 602290 | 488750 | 633160   | Low       | Enriched  | Enriched  | Enriched  | YES      |       |
| Q13103-0130360: Saccharinophenanthroline SPP2          | 21.437                                                   | 13.3   | 3    | 3  | 4.6528  | 0.0004  | 31088  | 36641   | 41991   | 25022  | 48142  | 4604   | 4577    | 12732  | 26681  | 46274    | No exeres | No exeres | No exeres | No exeres | YES      |       |
| Q13112                                                 | Chromatin assembly factor H CHAF1B                       | 60.992 | 1.8  | 1  | 2.1818  | 0.0006  | 83418  | 51513   | 68775   | 92688  | 68726  | 74741  | 91656   | 93949  | 61968  | 80108    | Low       | No exeres | Moderate  | Enriched  | YES      |       |
| Q13113-013113:2: SAMP domain protein C11orf113         | 64.009                                                   | 21.1   | 12   | 12 | 0.0000  | 0       | 47860  | 48604   | 69233   | 45360  | 49242  | 45360  | 47427   | 42909  | 37704  | 41948    | Low       | Enriched  | Enriched  | Enriched  | YES      |       |
| Q13148-013148:7: TAR DNA-binding protein TARDBP1       | 47.349                                                   | 32.9   | 21   | 21 | 81.8398 | 0       | 131101 | 107100  | 99500   | 112350 | 121700 | 121700 | 134070  | 163380 | 82442  | 124360   | No exeres | Enriched  | Enriched  | Enriched  | YES      |       |
| Q13151                                                 | Heterotrimeric guanine nucleotide-binding protein HGNBP3 | 30.473 | 4.3  | 12 | 21      | 117.36  | 0      | 72344   | 60765   | 90722  | 68235  | 78864  | 97666   | 133530 | 152010 | 89657    | 17130     | Enriched  | Enriched  | Enriched  | Enriched | YES   |
| Q13155-013155:4: Amphiphysin-1                         | 35.148                                                   | 14.8   | 11   | 11 | 0.0000  | 0       | 12475  | 12475   | 12475   | 12475  | 12475  | 12475  | 12475   | 12475  | 12475  | 12475    | 12475     | 12475     | 12475     | 12475     | 12475    | 12475 |
| Q13158                                                 | FADD-associated death FADD                               | 23.279 | 4.8  | 1  | 1.2804  | 0.0026  | 23164  | 33166   | 39344   | 31963  | 36735  | 2837   | 39977   | 3608.9 | 21114  | 39817    | Enriched  | Moderate  | Enriched  | Enriched  | Enriched | YES   |
| Q13162-013162:3: Peroxisomal domain PRDX4              | 30.54                                                    | 64.2   | 31   | 23 | 89.867  | 0       | 214240 | 163210  | 144670  | 177660 | 179120 | 173420 | 108410  | 166690 | 186810 | 117730   | Enriched  | Enriched  | Enriched  | Enriched  | Enriched | YES   |
| Q13177                                                 | Serine-threonine-protein kinase SIK2                     | 58.642 | 32.6 | 20 | 10.269  | 0       | 107420 | 96279   | 92255   | 82773  | 119720 | 113750 | 84534   | 80148  | 14255  | 44253    | 28363     | Moderate  | Moderate  | Enriched  | Enriched | YES   |
| Q13185-013185:1: Chromatin protein CH3P3               | 20.811                                                   | 21.9   | 6    | 6  | 62.452  | 0       | 47860  | 32318   | 44899   | 30428  | 49976  | 45626  | 62209   | 62209  | 62209  | 62209    | 62209     | No exeres | Enriched  | Enriched  | Enriched | YES   |
| Q13188-013188:2: Serine-threonine-protein PAK3         | 36.5                                                     | 18.9   | 10   | 6  | 22.194  | 0       | 17545  | 12875   | 13289   | 13102  | 14391  | 20225  | 24108   | 32522  | 20940  | 22165    | Enriched  | Enriched  | Moderate  | Low       | YES      |       |
| Q13200-013200:3: 26S proteasome core - PSM22           | 100.2                                                    | 36.3   | 44   | 35 | 184.11  | 0       | 162690 | 95178   | 124220  | 238490 | 131690 | 196030 | 141370  | 235170 | 114570 | 180950   | Enriched  | Enriched  | Enriched  | Enriched  | Enriched |       |
| Q13206-013206:2: Prostate-ATP-domain CDK3              | 100.8                                                    | 34.9   | 28   | 28 | 21.159  | 0       | 64039  | 3779    | 62487   | 5842   | 8007   | 98023  | 15937   | 14995  | 90412  | 21998    | Enriched  | Enriched  | Enriched  | Enriched  | Enriched |       |
| Q13217-013217:2: DnaJ homologue subfamily DNADJ3       | 57.579                                                   | 26.8   | 25   | 25 | 205.28  | 0       | 148300 | 102750  | 108570  | 131270 | 149870 | 181360 | 141480  | 94196  | 115970 | 129930   | Enriched  | Enriched  | Enriched  | Enriched  | Enriched |       |
| Q13228-013228:4: Selenium-binding protein SELENBP1     | 59.23                                                    | 55.1   | 40   | 40 | 265.35  | 0       | 252890 | 197100  | 212960  | 277640 | 224940 | 252030 | 43730   | 268480 | 224060 | 240670   | Enriched  | Enriched  | Enriched  | Enriched  | Enriched |       |
| Q13224-013224:1: Nucleoside diphosphate NME12B         | 15.019                                                   | 27.8   | 8    | 8  | 20.794  | 0       | 97376  | 58771   | 60757   | 56409  | 84715  | 51146  | 58168   | 56569  | 32450  | 57993    | Low       | Moderate  | Enriched  | Enriched  | Enriched |       |
| Q13248-013248:1: Serine-threonine-protein GSK3B        | 26.619                                                   | 26.7   | 6    | 6  | 11.039  | 0       | 29368  | 15342   | 16739   | 23632  | 20286  | 19133  | 19223   | 744.6  | 18581  | 18581    | Enriched  | Enriched  | Enriched  | Enriched  | Enriched |       |
| Q13248-013248:2: Serine-threonine-protein GSK3B        | 31.263                                                   | 22.4   | 7    | 7  | 6.4927  | 0       | 44024  | 26177   | 40803   | 38810  | 37482  | 30506  | 19511   | 32777  | 33227  | 30880    | Enriched  | Enriched  | Enriched  | Enriched  | Enriched |       |
| Q13248-013248:3: Serine-threonine-protein GSK3B        | 38.418                                                   | 26.6   | 14   | 8  | 40.521  | 0       | 66733  | 53914   | 59941   | 78360  | 72407  | 65449  | 109990  | 97342  | 76090  | 95104    | Enriched  | Enriched  | Enriched  | Enriched  | Enriched |       |
| Q13283-013283:2: Transcription intermediate TRIM28     | 79.473                                                   | 26.4   | 28   | 28 | 241.32  | 0       | 164230 | 146690  | 175620  | 191810 | 194550 | 190260 | 26000   | 228990 | 143650 | 21720    | Moderate  | Enriched  | Enriched  | Low       | YES      |       |
| Q13283                                                 | RN GTPase-activating protein GTPBP1                      | 52.164 | 21   | 12 | 10.3565 | 0       | 11163  | 47380   | 61005   | 88861  | 69514  | 70743  | 97349   | 89944  | 56459  | 95054    | Enriched  | Enriched  | Enriched  | Enriched  | Enriched |       |
| Q13287                                                 | Nvay-interactor NMI                                      | 35.056 | 8.1  | 2  | 2.59856 | 0       | 85867  | 7829.1  | 82614.8 | 81218  | 11129  | 57844  | 8059.9  | 8527.3 | 3397.4 | 11189    | Enriched  | Enriched  | Moderate  | Moderate  | Enriched |       |
| Q13306-013306:3: Inactive tyrosine-protein PTK7        | 89.763                                                   | 3.8    | 2    | 2  | 9.8343  | 0       | 63941  | 42729.6 | 52964.6 | 6414   | 39107  | 4873.4 | 60956.6 | 6878.8 | 2917.8 | 59817    | Moderate  | Low       | Moderate  | No exeres | YES      |       |
| Q13310-013310:2: Poliovirus protein 2A                 | 60.878                                                   | 20.8   | 19   | 19 | 0.0000  | 0       | 10113  | 20000   | 20000   | 20000  | 20000  | 20000  | 20000   | 20000  | 20000  | 20000    | 20000     | 20000     | 20000     | 20000     | 20000    |       |
| Q13315                                                 | Serine-protein kinase kinase FAK2                        | 35.068 | 6.8  | 10 | 11.1226 | 0       | 34025  | 20125   | 20124   | 26652  | 25858  | 23935  | 22551   | 27579  | 13056  | 28298    | Enriched  | Enriched  | Enriched  | Enriched  | Enriched |       |
| Q13322-013322:3: Growth factor receptor GFR1           | 60.239                                                   | 9.7    | 6    | 6  | 2.9395  | 0       | 24379  | 19822   | 23552   | 19077  | 30074  | 14611  | 22060   | 16641  | 18009  | 18389    | Enriched  | Enriched  | Enriched  | Enriched  | Enriched |       |
| Q13325-013325:2: Interferon-induced protein IFI302     | 15.019                                                   | 3.2    | 2    | 2  | 7.2225  | 0.00043 | 17840  | 10099   | 14395   | 22574  | 13293  | 18811  | 16498   | 22959  | 8809   | 20462    | Moderate  | Moderate  | Enriched  | Enriched  | Enriched |       |
| Q13332-013332:3: Recombination protein CTR9            | 212.4                                                    | 48.8   | 4    | 4  | 0.0000  | 0       | 47860  | 23218   | 44857   | 30628  | 49756  | 19732  | 28922   | 28922  | 28922  | 28922    | 28922     | 28922     | 28922     | 28922     | 28922    |       |
| Q13347                                                 | Eukaryotic translation EIF2E1                            | 36.501 | 40   | 20 | 65.643  | 0       | 123900 | 74861   | 78327   | 93579  | 117840 | 81501  | 126230  | 110030 | 84039  | 107430   | Enriched  | Enriched  | Enriched  | Enriched  | Enriched |       |
| Q13363-013363:2: C-terminal-binding protein CTBP1      | 40.644                                                   | 16.6   | 10   | 5  | 18.268  | 0       | 31215  | 21620   | 24032   | 25815  | 25039  | 30289  | 30904   | 47376  | 38089  | 37731    | Enriched  | Enriched  | Enriched  | Enriched  | Enriched |       |
| Q13393-013393:3: Phosphatase SH-PTP2                   | 101.2                                                    | 18.2   | 19   | 19 | 16.817  | 0       | 96652  | 79319   | 81477   | 10652  | 1132   | 83417  | 51091   | 97404  | 11245  | 64849    | Enriched  | Enriched  | Moderate  | Enriched  | Enriched |       |
| Q13405-013405:9: 39S ribosomal protein RPLP4L9         | 19.198                                                   | 20.5   | 4    | 4  | 26.673  | 0       | 11197  | 8867.6  | 10517   | 10896  | 15477  | 9943   | 12938   | 9955.1 | 8415.1 | 13525    | Enriched  | Enriched  | Enriched  | Enriched  | Enriched |       |
| Q13409-013409:3: Cytoplasmic dynein 1 DYNC1H2          | 68.426                                                   | 19.3   | 21   | 2  | 208.18  | 0       | 100210 | 68330   | 79115   | 85330  | 102550 | 100700 | 105140  | 94498  | 62115  | 109340   | Enriched  | Enriched  | Enriched  | Enriched  | Enriched |       |
| Q13423                                                 | NAD(P) transhydrogenase NNT                              | 113.89 | 20.7 | 50 | 15.1236 | 0       | 219260 | 17860   | 195700  | 183280 | 226070 | 184800 | 21960   | 239900 | 103120 | 10480    | No exeres | Moderate  | Enriched  | Low       | YES      |       |
| Q13425                                                 | Bea-2 cytoskeleton-binding protein CBP2                  | 14.41  | 14.7 | 19 | 16.817  | 0       | 29368  | 17369   | 18784   | 17660  | 20286  | 19133  | 19223   | 744.6  | 18581  | 18581    | Enriched  | Enriched  | Enriched  | Enriched  | Enriched |       |
| Q13426                                                 | DNA repair protein XPC-HHR23C                            | 38.286 | 3.9  | 1  | 1.69075 | 0       | 80529  | 8890.4  | 8478.9  | 79574  | 58906  | 54074  | 73849   | 67463  | 38715  | 73234    | Moderate  | Low       | Enriched  | Enriched  | Enriched |       |
| Q13427-013427:2: Peptidyl prolyl-cis-PP2G              | 40.299                                                   | 23.2   | 9    | 6  | 36.2424 | 0       | 66484  | 50510   | 59856   | 79574  | 58906  | 54074  | 73849   | 67463  | 38715  | 73234    | Moderate  | Low       | Enriched  | Enriched  | Enriched |       |
| Q13428-013428:2: Protein G                             | 144.141                                                  | 19.7   | 6    | 6  | 11.039  | 0       | 46281  | 37178   | 45209   | 35299  | 4711   | 41853  | 91333   | 55192  | 78656  | 65849    | Enriched  | Enriched  | Enriched  | Enriched  | Enriched |       |
| Q13428-013428:3: Protein G                             | 75.561                                                   | 16.7   | 16   | 16 | 76.08   | 0       | 66484  | 50510   | 59856   | 79574  | 58906  | 54074  | 73849   | 67463  | 38715  | 73234    | Moderate  | Low       | Enriched  | Enriched  | Enriched |       |
| Q13442                                                 | 28 kDa heat-shock and acid PDAP1                         | 20.63  | 49.2 | 14 | 14.6022 | 0       | 87303  | 55345   | 51925   | 86579  | 61156  | 74264  | 109850  | 103550 | 87117  | 118150   | Moderate  | Moderate  | Enriched  | Enriched  | Enriched |       |
| Q13448-013448:2: Densin and metal ADAM15               | 86.139                                                   | 5.1    | 3    | 3  | 4.0752  | 0       | 48936  | 35653   | 42253   | 51671  | 47717  | 48378  | 55563   | 54637  | 33617  | 116514   | Moderate  | No exeres | Moderate  | Enriched  | Enriched |       |
| Q13445                                                 | Transmembrane protein TMEM162                            | 25.206 | 19.6 | 9  | 20.2728 | 0       | 10829  | 11755   | 11876   | 12280  | 13440  | 14056  | 11203   | 14019  | 5899   | 11913    | No exeres | Moderate  | Enriched  | No exeres | YES      |       |
| Q13451                                                 | Peptidyl prolyl-cis-PP2G                                 | 51.212 | 38.7 | 27 | 24.5752 | 0       | 153900 | 151200  | 137800  | 124180 | 163800 | 180480 | 154300  | 138710 | 148530 | Moderate | Enriched  | Enriched  | Enriched  | Enriched  | Enriched |       |
| Q13464                                                 | Rho-associated protein ROCK1                             | 158.17 | 9.5  | 12 | 10.2306 | 0       | 35864  | 20298   | 40251   | 38883  | 43202  | 37503  | 52249   | 51417  | 30314  | 47283    | Enriched  | Enriched  | Enriched  | Enriched  | Enriched |       |
| Q13469-013469:3: Nucleoside diphosphate NME12C         | 15.019                                                   | 27.8   | 8    | 8  | 24.712  | 0       | 13098  | 11755   | 11876   | 12280  | 13440  | 14056  | 11203   | 14019  | 5899   | 11913    | No exeres | Moderate  | Enriched  | No exeres | YES      |       |
| Q13492-013492:3: Phosphatidylinositol-3-OH kinase PDK1 | 66.932                                                   | 13.8   | 9    | 9  | 66.661  | 0       | 83910  | 81754   | 88187   | 72661  | 82111  | 80861  | 89157   | 112050 | 60614  | 105450   | Moderate  |           |           |           |          |       |



|               |                                    |         |      |     |     |         |         |         |         |         |         |         |         |         |         |         |         |          |           |           |           |           |           |          |
|---------------|------------------------------------|---------|------|-----|-----|---------|---------|---------|---------|---------|---------|---------|---------|---------|---------|---------|---------|----------|-----------|-----------|-----------|-----------|-----------|----------|
| QSH47-Q35347  | Histone lysine N-methyltransferase | 62,123  | 11.9 | 8   | 8   | 11,576  | 6       | 22,452  | 20,503  | 24,051  | 19,247  | 41,035  | 28,013  | 22,750  | 18,009  | 12,416  | 22,216  | Moderate | Low       | Moderate  | No expres | YES       |           |          |
| QSH82         | Beta-lactamase-like p LACTB2       | 32,805  | 32.3 | 12  | 12  | 39,015  | 6       | 6,955   | 5,748   | 5,552   | 6,982   | 6,648   | 6,761   | 5,403   | 5,845   | 35,524  | 64,704  | Low      | Enriched  | Enriched  | No expres | YES       |           |          |
| QSLP7         | Adiponectin-like 4 ADI4            | 55,671  | 4.2  | 2   | 2   | 4,152   | 0.00062 | 1,366   | 1,062   | 1,164   | 1,184   | 1,184   | 1,134   | 1,184   | 1,184   | 1,184   | 1,184   | 1,184    | 1,184     | 1,184     | 1,184     | 1,184     | 1,184     |          |
| QSS1F7-Q53587 | Coronin-beta protein-COBL11        | 12,837  | 26.2 | 30  | 30  | 102,223 | 0       | 11,952  | 10,578  | 10,578  | 10,578  | 10,578  | 11,960  | 11,960  | 11,960  | 11,960  | 11,960  | 11,960   | 11,960    | 11,960    | 11,960    | 11,960    | 11,960    |          |
| QSS1F7-Q53587 | HCLSI-1 binding protein-HYB8D      | 42,718  | 21.4 | 8   | 8   | 27,267  | 0       | 47,376  | 36,300  | 34,784  | 33,153  | 39,760  | 40,868  | 41,709  | 55,409  | 33,580  | 40,845  | Enriched | Enriched  | Enriched  | No expres | YES       |           |          |
| QST3A-Q53578  | Cytoskeleton reduct CYRBD3         | 25,087  | 8.3  | 2   | 2   | 4,098   | 0.00062 | 2,376   | 2,082   | 2,911   | 2,243   | 3,414   | 2,988   | 1,732   | 1,812   | 21,756  | 40,282  | Enriched | Enriched  | Enriched  | No expres | YES       |           |          |
| QST3A-Q53578  | WDR192                             | 197,299 | 2.3  | 4   | 4   | 5,407   | 0.00062 | 993.9   | 930.7   | 6,803   | 5,788   | 5,788   | 5,788   | 5,788   | 5,788   | 5,788   | 5,788   | 5,788    | 5,788     | 5,788     | 5,788     | 5,788     | 5,788     |          |
| QSVL3         | OXA domain-containing OXA2D        | 16,953  | 23.4 | 3   | 3   | 5,928   | 0       | 4,065   | 4,404   | 4,583   | 3,977   | 6,101   | 3,753   | 3,239   | 6,039   | 8,636   | 91,117  | Enriched | Enriched  | Enriched  | No expres | YES       |           |          |
| QSR06         | EFEMP1                             | 18,424  | 23.3 | 5   | 5   | 2,559   | 0.00044 | 2,116   | 2,973   | 2,358   | 1,740   | 3,666   | 1,847   | 1,817   | 3,073   | 3,073   | 2,966   | 21,217   | Enriched  | Enriched  | Enriched  | Low       | YES       |          |
| QSR85         | Putative heat shock p HSP90AB2P    | 58,246  | 22   | 22  | 22  | 3,643   | 0       | 8,022   | 4,913   | 4,913   | 4,913   | 4,913   | 4,913   | 4,913   | 4,913   | 4,913   | 4,913   | 4,913    | 4,913     | 4,913     | 4,913     | 4,913     | 4,913     |          |
| QSR85         | Putative heat shock p HSP90AB2P    | 44,348  | 27   | 23  | 23  | 4,866   | 0.00043 | 3,925   | 9,891   | 7,669   | 7,669   | 6,58    | 9,609   | 11,719  | 10,536  | 9,773   | 6,096   | 3,800    | 21,972    | 5,927     | Enriched  | Enriched  | Enriched  | Enriched |
| QSBF2-Q53623  | Transmembrane protein TMEM97       | 20,848  | 17   | 8   | 8   | 15,611  | 0       | 40,756  | 39,500  | 4,944   | 6,567   | 5,082   | 3,320   | 5,031   | 3,733   | 21,972  | 5,927   | Enriched | Enriched  | Enriched  | Enriched  | Enriched  | Enriched  |          |
| QSBK2-Q53623  | DBRD domain class 2 ZNF726         | 65,653  | 13.6 | 7   | 7   | 14,435  | 0       | 6,578   | 5,606   | 5,638   | 6,079   | 6,273   | 4,751   | 4,704   | 4,970   | 3,475   | 5,746   | Enriched | Enriched  | Enriched  | Enriched  | Enriched  | Enriched  |          |
| QSBK1-Q53618  | P2X domain-containing P2XD1        | 19,729  | 24.3 | 4   | 4   | 5,407   | 0.00062 | 993.9   | 930.7   | 6,803   | 5,788   | 5,788   | 5,788   | 5,788   | 5,788   | 5,788   | 5,788   | 5,788    | 5,788     | 5,788     | 5,788     | 5,788     | 5,788     |          |
| QSEB0-Q53618  | SRFBP domain-containing SRFBP2     | 39,569  | 7.7  | 3   | 3   | 4,101   | 0.00062 | 2,008   | 1,979   | 2,052   | 2,154   | 2,535   | 1,772   | 2,556   | 1,527   | 2,361   | 20,317  | Moderate | Enriched  | Enriched  | Enriched  | No expres | YES       |          |
| QSG76-Q53618  | Dual homology subunit DNAC21       | 60,271  | 3    | 2   | 2   | 5,306   | 0       | 8,657   | 5,522   | 8,104   | 6,988   | 7,019   | 5,342   | 7,401   | 6,862   | 4,092   | 8,503   | Low      | Enriched  | Enriched  | Enriched  | No expres | YES       |          |
| QSG16-Q53618  | von Willebrand factor VWL2         | 74,84   | 2    | 2   | 2   | 5,363   | 0       | 12,403  | 15,008  | 16,040  | 11,005  | 19,816  | 16,679  | 11,952  | 12,014  | 14,072  | 15,028  | Enriched | Enriched  | Enriched  | Enriched  | Enriched  | Enriched  |          |
| QSL26-Q53623  | Probable E3 ubiquitin HR23C        | 10,627  | 4    | 3   | 3   | 10,144  | 0       | 6,247   | 4,582   | 5,526   | 5,768   | 5,818   | 3,563   | 3,647   | 5,252   | 21,82   | 46,284  | Low      | Enriched  | Enriched  | Enriched  | No expres | YES       |          |
| QSH54         | FLN3                               | 27,658  | 47.6 | 203 | 203 | 2,321   | 0       | 7,888   | 84,760  | 78,120  | 72,260  | 108,100 | 79,180  | 129,200 | 118,700 | 84,110  | 115,000 | Enriched | Enriched  | Enriched  | Enriched  | Enriched  | Enriched  |          |
| QSHY7-Q53617  | Mesaxin-3                          | 28,608  | 15.5 | 2   | 2   | 4,035   | 0       | 23,179  | 14,725  | 15,991  | 28,989  | 61,649  | 12,525  | 11,737  | 21,236  | 30,615  | 19,114  | Low      | Enriched  | Enriched  | Enriched  | No expres | YES       |          |
| QSHY8-Q53617  | Rainbow trout-like ZNRK2D6C        | 26,422  | 30.9 | 18  | 18  | 31,424  | 0       | 25,908  | 54,428  | 53,007  | 53,007  | 53,007  | 53,007  | 53,007  | 53,007  | 53,007  | 53,007  | 53,007   | 53,007    | 53,007    | 53,007    | 53,007    | 53,007    |          |
| QSHY3-Q53617  | 2-methoxy-6-polyene COG2           | 13,414  | 26.6 | 8   | 8   | 17,843  | 0       | 30,352  | 31,725  | 32,178  | 32,178  | 32,178  | 32,178  | 32,178  | 32,178  | 32,178  | 32,178  | 32,178   | 32,178    | 32,178    | 32,178    | 32,178    | 32,178    |          |
| QSP17-Q53617  | Nodal modulator protein NOD2       | 33,149  | 48.2 | 82  | 82  | 6,323   | 0       | 42,420  | 30,610  | 35,010  | 44,570  | 36,800  | 56,800  | 57,400  | 55,290  | 28,940  | 41,448  | Enriched | Enriched  | Enriched  | Enriched  | No expres | YES       |          |
| QSR6A-Q53623  | Melanin inhibitory MIA3            | 21,317  | 25.9 | 52  | 52  | 313.21  | 0       | 20,940  | 19,360  | 21,670  | 22,440  | 23,280  | 22,560  | 21,950  | 25,780  | 17,480  | 27,580  | Moderate | Moderate  | Enriched  | Moderate  | Enriched  | Enriched  |          |
| QSR1-Q53618   | UBA1                               | 18,604  | 48   | 13  | 13  | 4,589   | 0       | 13,909  | 8,204   | 9,213   | 15,662  | 9,216   | 16,099  | 11,349  | 18,347  | 5,674   | 11,349  | Moderate | Moderate  | Enriched  | Enriched  | Enriched  | Enriched  |          |
| QSR4          | CELA2B                             | 13,736  | 19   | 3   | 3   | 5,804   | 0       | 12,862  | 13,906  | 14,833  | 19,415  | 17,205  | 8,022   | 9,974   | 5,106   | 6,749   | 741.8   | Low      | Moderate  | Moderate  | Enriched  | Enriched  | Enriched  |          |
| QSR3-Q53618   | Presequence protease PREP1         | 11,717  | 41   | 16  | 16  | 4,123   | 0       | 9,421   | 8,001   | 8,001   | 8,001   | 8,001   | 8,001   | 8,001   | 8,001   | 8,001   | 8,001   | 8,001    | 8,001     | 8,001     | 8,001     | 8,001     | 8,001     |          |
| QSSD1-Q53618  | YADC2                              | 22,159  | 45.1 | 16  | 16  | 2,175   | 0.0056  | 81.74   | 278.79  | 254.16  | 924.49  | 244.19  | 154.36  | 424     | 219.46  | 170.36  | 427.6   | Enriched | Enriched  | Enriched  | Enriched  | Enriched  | Enriched  |          |
| QSS18-Q53618  | WD repeat-containing WDR44         | 91,771  | 9    | 9   | 9   | 34,648  | 0       | 42,947  | 34,235  | 34,640  | 37,981  | 36,457  | 42,443  | 52,880  | 6,801   | 25,145  | 47,233  | Low      | Low       | Moderate  | No expres | YES       |           |          |
| QSS19-Q53618  | FYVE, RhoGAP and PDCD3             | 68,293  | 9    | 2   | 2   | 4,283   | 0.00063 | 7,338   | 6,885   | 6,824   | 8,468   | 6,477   | 5,586   | 4,734   | 6,615   | 31.1    | 62,995  | Enriched | Enriched  | Enriched  | Enriched  | No expres | YES       |          |
| QSS2-Q53618   | Protein RAB23                      | 16,133  | 2.2  | 3   | 3   | 4,507   | 0.00044 | 2,652   | 2,652   | 2,652   | 2,652   | 2,652   | 2,652   | 2,652   | 2,652   | 2,652   | 2,652   | 2,652    | 2,652     | 2,652     | 2,652     | 2,652     | 2,652     |          |
| QSTB-Q53618   | Lamina-specific protein LAMP3      | 16,229  | 38.2 | 3   | 3   | 7,596   | 0       | 20,508  | 19,905  | 19,907  | 3,073   | 19,963  | 17,246  | 22,147  | 30,308  | 9,558   | 23,382  | Low      | Low       | No expres | No expres | No expres | No expres |          |
| QSTC-Q53618   | Placenta subunit class PLAC3       | 67,142  | 12.6 | 28  | 28  | 24,117  | 0       | 37,894  | 43,004  | 47,450  | 37,073  | 65,841  | 60,992  | 124,280 | 115,880 | 34,500  | 60,880  | Moderate | No expres | Moderate  | No expres | Enriched  | Enriched  |          |
| QST12-Q53618  | RAB18                              | 122,771 | 11   | 11  | 11  | 31,424  | 0       | 6,294   | 28,904  | 14,581  | 12,832  | 16,554  | 16,552  | 14,746  | 18,098  | 7,604   | 11,215  | Moderate | Enriched  | Enriched  | Enriched  | No expres | YES       |          |
| QST5-Q53618   | Cytoskeleton reduct COG6           | 18,006  | 26.5 | 10  | 10  | 38,061  | 0       | 37,909  | 42,906  | 51,684  | 35,214  | 63,975  | 28,308  | 38,740  | 32,422  | 22,530  | 38,200  | Enriched | Enriched  | Enriched  | Enriched  | Enriched  | Enriched  |          |
| QSTY1-Q53618  | Glucoamylase GMEB2                 | 51,233  | 4    | 2   | 2   | 7,995   | 0       | 14,170  | 5,810   | 9,361   | 9,286   | 9,609   | 15,775  | 13,294  | 17,534  | 76,151  | 14,796  | Enriched | Enriched  | Enriched  | Enriched  | No expres | YES       |          |
| QSTY5-Q53618  | Torsin-1A-interacting TOR1AIP1     | 66,248  | 25.6 | 16  | 16  | 29,485  | 0       | 33,596  | 32,198  | 40,449  | 29,661  | 48,900  | 26,241  | 43,185  | 34,001  | 31,367  | 35,476  | Enriched | Enriched  | Enriched  | Enriched  | Enriched  | Enriched  |          |
| QST9          | Alcamin-like RAB25                 | 97,244  | 11   | 11  | 11  | 31,424  | 0       | 6,294   | 28,904  | 14,581  | 12,832  | 16,554  | 16,552  | 14,746  | 18,098  | 7,604   | 11,215  | Moderate | Enriched  | Enriched  | Enriched  | No expres | YES       |          |
| QSUW8-Q53618  | DNA large homology DLG3            | 9,605   | 7.5  | 6   | 6   | 4,358   | 0       | 24,562  | 14,569  | 14,939  | 23,034  | 17,479  | 19,658  | 18,217  | 16,465  | 10,860  | 13,871  | Enriched | Enriched  | Enriched  | Enriched  | Moderate  | Enriched  |          |
| QSV5-Q53618   | Cenasin                            | 16,875  | 69   | 1   | 1   | 2,599   | 0.00073 | 410     | 407.38  | 398.48  | 220.86  | 810     | 11,011  | 4,396.5 | 4,982   | 16,251  | 21,549  | Enriched | Enriched  | Enriched  | Enriched  | Enriched  | Enriched  |          |
| QSV7-Q53618   | PCI domain-containing PCD2         | 43,578  | 41.7 | 14  | 14  | 2,465   | 0.00043 | 4,958.7 | 6,483.3 | 5,854.7 | 6,201.1 | 4,401.4 | 5,162.7 | 4,494.6 | 4,996.7 | 2,999.5 | 5,081.7 | Moderate | Low       | Moderate  | No expres | YES       |           |          |
| QSV8          | GSTA3                              | 19,742  | 39.5 | 20  | 20  | 4,627   | 0.00043 | 10,007  | 7,811   | 7,325.6 | 4,777.2 | 6,022.2 | 10,258  | 5,203.3 | 4,445.7 | 25,134  | 6,052   | Moderate | Low       | Moderate  | No expres | YES       |           |          |
| QSV85-Q53618  | Crotched neck-like protein CRNK1   | 19,172  | 7.5  | 7   | 7   | 29,905  | 0       | 51,961  | 39,033  | 54,874  | 57,999  | 69,982  | 66,184  | 68,635  | 64,574  | 41,751  | 61,964  | Moderate | Moderate  | Enriched  | Enriched  | Enriched  | Enriched  |          |
| QSR30-Q53618  | Long-chain fatty acid LCAT3        | 87,123  | 9.2  | 5   | 5   | 4,282   | 0.00063 | 7,338   | 6,885   | 6,824   | 8,468   | 6,477   | 5,586   | 4,734   | 6,615   | 31.1    | 62,995  | Enriched | Enriched  | Enriched  | Enriched  | No expres | YES       |          |
| QSLA-Q53618   | Ubiquitin carboxyl-1 ECH1          | 40,423  | 22.5 | 9   | 9   | 20,073  | 0       | 27,018  | 26,922  | 25,535  | 25,386  | 26,066  | 32,064  | 30,625  | 30,608  | 16,229  | 25,108  | Moderate | Enriched  | Enriched  | Enriched  | Enriched  | Enriched  |          |
| QSLN-Q53618   | EGF domain-like UCLF5              | 62,101  | 7    | 4   | 4   | 4,248   | 0.00063 | 9,847   | 9,339   | 6,988   | 6,808   | 8,208   | 3,048   | 5,001   | 5,881   | 5       | 6,027   | 66,849   | Enriched  | Enriched  | Enriched  | Enriched  | Enriched  |          |
| QSP14-Q53618  | Tubulin-associated TUBA1B          | 48,194  | 4.2  | 2   | 2   | 5,174   | 0.00044 | 3,180   | 978.4   | 1,451   | 1,283   | 1,654   | 1,652   | 1,476   | 1,808   | 7,604   | 11,215  | Moderate | Enriched  | Enriched  | Enriched  | No expres | YES       |          |
| QSP16-Q53618  | Deoxynucleoside diphosphate DNT2P  | 84,468  | 4.6  | 3   | 3   | 3,932   | 0.00061 | 2,690.9 | 3,913   | 2,697.8 | 2,      |         |         |         |         |         |         |          |           |           |           |           |           |          |













|              |                                      |        |      |    |    |         |         |         |         |         |         |         |         |         |         |         |          |           |          |          |               |               |           |
|--------------|--------------------------------------|--------|------|----|----|---------|---------|---------|---------|---------|---------|---------|---------|---------|---------|---------|----------|-----------|----------|----------|---------------|---------------|-----------|
| QBWT0-3QBWT8 | Acid leucine-rich n ANP2E            | 25.125 | 25.9 | 8  | 8  | 24.985  | 0       | 11265   | 5549.7  | 6636.7  | 22548   | 62239   | 14399   | 7066.9  | 12577   | 4057.6  | 12628    | Enriched  | Moderate | Enriched | Moderate      | YES           |           |
| QBWT6-QBWT6  | Leucine-rich repeat-c LRR1C1         | 59.241 | 9.4  | 5  | 2  | 3.9198  | 0.00061 | 14454   | 25062   | 18272   | 16586   | 19225   | 11261   | 11046   | 10452   | 8780.1  | 11793    | Moderate  | Moderate | Enriched | Moderate      | No expres     |           |
| QBWT4        | Transmembrane protein TMEM343        | 44.475 | 13   | 13 | 4  | 16.533  | 0       | 34279   | 21255   | 30252   | 24991   | 33093   | 21996   | 31167   | 21669   | 20068   | 20074    | 21669     | Enriched | Enriched | Enriched      | No expres     |           |
| QBWX3-2      |                                      | 11.019 | 17   | 4  | 4  | 16.533  | 0       | 34279   | 21255   | 30252   | 24991   | 33093   | 21996   | 31167   | 21669   | 20068   | 20074    | 21669     | Enriched | Enriched | Enriched      | No expres     |           |
| QBWT2        | Plasma alpha-L-fuco FBUC2            | 24.066 | 7.3  | 3  | 3  | 6.4233  | 0       | 5328.7  | 5086.6  | 5198.8  | 8208.9  | 40942   | 5433.8  | 4989.1  | 11645   | 2518.6  | 6398.6   | Enriched  | Enriched | Enriched | Enriched      | No expres     |           |
| QBWT5-2QBWT5 | Dehydrogenase reductase DBRCA2       | 51.066 | 16.6 | 5  | 5  | 7.4421  | 0       | 8588.5  | 10916   | 14537   | 7805.9  | 14173   | 9220.6  | 13920   | 13226   | 9968.4  | 12796    | Enriched  | Enriched | Enriched | No expression |               |           |
| QBWT3-1QBWT2 | Liquid-like LRR1C2                   | 67.155 | 15.3 | 11 | 2  | 1.8411  | 0.00061 | 14454   | 25062   | 18272   | 16586   | 19225   | 11261   | 11046   | 10452   | 8780.1  | 11793    | Moderate  | Moderate | Enriched | Enriched      |               |           |
| QBWL8        | Proline-rich protein 1 PRRL1S1       | 11.705 | 26.2 | 2  | 2  | 23.983  | 0       | 12588   | 12027   | 11060   | 11064   | 13571   | 10855   | 8926.9  | 6216.5  | 6363.1  | 11904    | 21669     | Enriched | Enriched | Enriched      | Enriched      |           |
| QBWL5-3QBWL5 | MAR kinase-interacti MKR1L1DK2686814 | 39.103 | 17.9 | 5  | 5  | 10.124  | 0       | 40148   | 31429   | 27480   | 31367   | 30429   | 22948   | 21208   | 24016   | 10761   | 10682    | Enriched  | Enriched | Enriched | Enriched      | YES           |           |
| QBWL7-3QBWL7 | Transmembrane protein TMEM109        | 18.457 | 21   | 2  | 2  | 5.9825  | 0       | 20019   | 22847   | 16308   | 14733   | 19879   | 59612   | 30176   | 26275   | 11295   | 19701    | Enriched  | Enriched | Enriched | Enriched      | Enriched      |           |
| QBWL5        | Tubulin beta 6 chain TUBB6           | 49.857 | 40.6 | 43 | 1  | 10.85   | 0       | 14817   | 8866.2  | 10218   | 12157   | 14600   | 11314   | 11141   | 9430.5  | 4794.5  | 10773    | Moderate  | Enriched | Enriched | Enriched      | No expres     |           |
| QBWL7        | Protein crumbs homo CRB3             | 12.854 | 13.3 | 1  | 1  | 20.856  | 0       | 2629.3  | 2368.1  | 2958.7  | 3181    | 3863.4  | 1990.8  | 2538.6  | 2882.4  | 1806.8  | 2833.4   | Enriched  | Enriched | Enriched | Enriched      | No expres     |           |
| QBWL6        | Uncharacterized prot C9orf142        | 21.439 | 28.4 | 7  | 7  | 22.097  | 0       | 22716   | 14105   | 17477   | 12819   | 23193   | 11282   | 22741   | 21158   | 11316   | 21179    | Moderate  | Moderate | Moderate | Moderate      | No expres     |           |
| QBWL9        | Ribonuclease P-type RP22             | 20.623 | 1.1  | 1  | 1  | 21.821  | 0.00061 | 14454   | 25062   | 18272   | 16586   | 19225   | 11261   | 11046   | 10452   | 8780.1  | 11793    | Moderate  | Moderate | Enriched | Enriched      | No expres     |           |
| QBWL8-2QBWL8 | Derlin-1 DERL1                       | 26.623 | 3.9  | 1  | 1  | 21.073  | 0.00061 | 14454   | 25177   | 5882.7  | 428.8   | 948.0   | 1044.7  | 6019.2  | 11138   | 11811   | 1446.8   | Enriched  | Enriched | Enriched | Enriched      | No expression |           |
| QBWL9-1QBWL9 | EF-hand domain-con EFHD1             | 26.927 | 20.9 | 5  | 3  | 7.0233  | 0       | 9727.3  | 7494.7  | 7974.9  | 9780.6  | 8494.8  | 8050    | 8577.6  | 9138.2  | 3851.9  | 10183    | Moderate  | Low      | Moderate | Moderate      | Enriched      |           |
| QBWL8        | Protein ATP-domain RP22              | 95.581 | 6.8  | 1  | 1  | 61.042  | 0       | 42967   | 32329   | 45313   | 32173   | 46297   | 63223   | 44614   | 44317   | 51944   | Moderate | Moderate  | Moderate | Moderate | Moderate      | YES           |           |
| QBWT1-QBWT1  | 3-hydroxybutyrate de BHDH2           | 26.724 | 37.1 | 10 | 10 | 26.833  | 0       | 4921.6  | 7941    | 42367   | 49188   | 45143   | 64586   | 66061   | 80363   | 28685   | 62048    | Enriched  | Enriched | Enriched | Enriched      | No expres     |           |
| QBWL8-4QBWL8 | Uncharacterized prot C20orf24        | 9.533  | 16.1 | 2  | 2  | 4.5047  | 0.00042 | 11021   | 9453.3  | 14871   | 4958.7  | 16038   | 15946   | 12477   | 5475.2  | 9052.6  | 85006    | Enriched  | Enriched | Enriched | Enriched      | No expression |           |
| QBWL10QBWT8  | Dol-P-ManMan7G ALG12                 | 54.654 | 10.7 | 6  | 6  | 6.1174  | 0       | 8342.2  | 7533.1  | 8011.3  | 8846.4  | 9052.1  | 20507   | 16964   | 32862   | 5524.9  | 10719    | Moderate  | Low      | Moderate | Moderate      | No expres     |           |
| QBWL2-2QBWL2 | Methionine-lyase MBP2                | 34.529 | 7    | 4  | 4  | 7.2124  | 0       | 2901.9  | 2284.7  | 16308   | 14733   | 19879   | 59612   | 30176   | 26275   | 11295   | 19701    | Enriched  | Enriched | Enriched | Enriched      | Enriched      |           |
| QBWL4-2QBWL4 | Vesicle-associated na VAMP8          | 11.438 | 32   | 4  | 4  | 23.539  | 0       | 6797.8  | 3233.8  | 3767.3  | 6527.4  | 4199.1  | 7445.7  | 28261   | 22656   | 14485   | 13455    | No expres | Enriched | Enriched | Enriched      | Enriched      |           |
| QBWL5        | L2-ubiquitin-3-lecto ADL1            | 21.498 | 27.9 | 5  | 5  | 18.044  | 0       | 19393   | 9453    | 18566   | 12504   | 9523.3  | 13694   | 22097   | 26437   | 7951.2  | 23919    | Enriched  | Enriched | Enriched | Enriched      | No expres     |           |
| QBWL7-1QBWL7 | Trans-2-Golgi-EMER2                  | 36.441 | 8.8  | 4  | 4  | 7.2124  | 0       | 2901.9  | 2284.7  | 16308   | 14733   | 19879   | 59612   | 30176   | 26275   | 11295   | 19701    | Enriched  | Enriched | Enriched | Enriched      | Enriched      |           |
| QBWL6        | Transmembrane protein TMEM109        | 26.21  | 13.2 | 8  | 8  | 21.511  | 0       | 12372   | 8771.7  | 8866.4  | 12127   | 12967   | 11868   | 3232    | 38392   | 5982.8  | 15558    | Moderate  | Enriched | Enriched | Enriched      | No expres     |           |
| QBWL6        | Protein PBD1C1 PBD1C1                | 26.056 | 32.2 | 9  | 9  | 39.239  | 0       | 24755   | 19014   | 21556   | 24996   | 19796   | 28221   | 23862   | 39774   | 10373   | 29519    | 23862     | Enriched | Enriched | Enriched      | Enriched      |           |
| QBWL4        | Nuclear complex n NCKL4              | 58.647 | 19   | 2  | 2  | 3.7643  | 0.00061 | 11021   | 12557   | 18108   | 2589.9  | 22584   | 30489   | 25972   | 3389    | 10261   | 39209    | Enriched  | Low      | Low      | No expres     | YES           |           |
| QBWL6-1QBWL6 | Uncharacterized prot C11orf141       | 8.1    | 10.0 | 1  | 1  | 10.0    | 0       | 12342.6 | 10.0    | 12312.9 | 10.0    | 12312.9 | 10.0    | 12312.9 | 10.0    | 12312.9 | 10.0     | 12312.9   | Enriched | Enriched | Enriched      | Enriched      | Enriched  |
| QBWL7        | DNA specificity prot VESUSP2         | 16.588 | 20.7 | 3  | 3  | 3.8292  | 0.00061 | 11021   | 1014.2  | 13232.8 | 100.0   | 1715.2  | 2674.9  | 2099    | 1222.3  | 156.8   | 1148.1   | Enriched  | Enriched | Enriched | Enriched      | Enriched      |           |
| QBWL6        | Transmembrane emc TMED9              | 17.277 | 47.7 | 27 | 21 | 17.4021 | 0       | 20230.0 | 14963.0 | 14930.0 | 16380.0 | 18100.0 | 18520.0 | 24190.0 | 16890.0 | 10540.0 | 15840.0  | Enriched  | Enriched | Enriched | Enriched      | Enriched      |           |
| QBWL4        | Gumma-glutamylamin GUM1              | 27.228 | 15.7 | 3  | 3  | 8.0788  | 0       | 20386   | 20446   | 22622   | 29745   | 24524   | 21211   | 21182   | 23910   | 10864   | 22887    | 23910     | Enriched | Enriched | Enriched      | Enriched      | Enriched  |
| QBWL2-2QBWL2 | Gumma-glutamylamin GUM1              | 60.154 | 22.4 | 12 | 12 | 18.811  | 0       | 27968   | 49891   | 37968   | 40485   | 43184   | 29849   | 40959   | 19803   | 40959   | Moderate | Enriched  | Enriched | Enriched | Enriched      | No expres     |           |
| QBWL2-2QBWL2 | Spermatogenesis-as SPATASL1          | 66.111 | 3.9  | 2  | 2  | 4.2323  | 0.00063 | 26298   | 3007.6  | 3144.8  | 3258.8  | 3435.4  | 2683.4  | 3027.6  | 2335.4  | 2097.2  | 2188.1   | Low       | Moderate | Enriched | Enriched      | No expres     |           |
| QBWL4-1QBWL4 | Specifically and non- SPATASL1       | 69.934 | 6.8  | 3  | 3  | 19.736  | 0       | 20631   | 33476   | 29277   | 21837   | 28608   | 18000   | 20859   | 24095   | 20859   | 21881    | Enriched  | Enriched | Enriched | Enriched      | No expres     |           |
| QBWL7-3QBWL7 | Nuclear envelope protein RRM4/RRM4B  | 65.799 | 19   | 10 | 10 | 17.8523 | 0       | 10383   | 16267   | 14625   | 13320   | 14972   | 14896   | 18759   | 19970   | 9773.1  | 17609    | Enriched  | Enriched | Enriched | Enriched      | Enriched      |           |
| QBWL3        | Tubulin polymerizati TPPP3           | 18.985 | 19.3 | 4  | 4  | 5.097   | 0.00044 | 5210.4  | 11032   | 11032   | 3770    | 2360.6  | 9393.1  | 1725.9  | 2231.7  | 2677.6  | 1401.5   | 3018.9    | Enriched | Moderate | Enriched      | Enriched      | No expres |
| QBWL6-2QBWL6 | Elongation of very lo ELOVL1         | 29.485 | 4.4  | 1  | 1  | 2.8929  | 0.00186 | 30082   | 3182.7  | 3188.5  | 2164.4  | 3392    | 2338.4  | 3396.8  | 2946.4  | 1535.5  | 2699.2   | Enriched  | Enriched | Enriched | Enriched      | Enriched      |           |
| QBWL5-3QBWL5 | Cold-inducible co- CCL20A            | 37.385 | 15.2 | 4  | 4  | 14.378  | 0       | 5338.5  | 5574    | 5641.4  | 3983.1  | 7917.9  | 3210.1  | 4172    | 3981    | 3844.7  | 5657.5   | Moderate  | Low      | Moderate | Moderate      | Enriched      |           |
| QBWL2-2QBWL2 | Thiosulfonate lyase TSL1             | 81.025 | 11.2 | 6  | 6  | 15.838  | 0       | 15053   | 16677   | 14625   | 13320   | 14972   | 14896   | 18759   | 19970   | 9773.1  | 17609    | Enriched  | Enriched | Enriched | Enriched      | Enriched      |           |
| QBWL1-QBWL1  | Acyetyl-CoA acetylra ACAT2           | 41.055 | 14.1 | 5  | 5  | 15.982  | 0       | 29983   | 28471   | 35475.5 | 24872   | 4355.1  | 2765.2  | 3973.9  | 4435.8  | 3202.3  | 3007.7   | Enriched  | Enriched | Enriched | Enriched      | No expres     |           |
| QBWL10QBWT8  | Repetition initiati 1 REP1N1ZNF785   | 63.574 | 5.8  | 3  | 3  | 10.853  | 0       | 10162   | 649.29  | 668.19  | 789.77  | 1285.7  | 847.49  | 1653    | 995.01  | 821.52  | 932.83   | Enriched  | Enriched | Enriched | Enriched      | No expression |           |
| QBWL7QBWT5   | RNA-binding protein RRM4/RRM4B       | 20.473 | 22   | 9  | 9  | 18.938  | 0       | 15053   | 16677   | 14625   | 13320   | 14972   | 14896   | 18759   | 19970   | 9773.1  | 17609    | Enriched  | Enriched | Enriched | Enriched      | Enriched      |           |
| QBWL2-2QBWL2 | FUNC1 domain-conto FUNC1D            | 20.675 | 17.5 | 6  | 6  | 9.099   | 0       | 53984   | 5005    | 52343   | 3733    | 83007   | 34215   | 37246   | 34846   | 17238   | 35642    | Enriched  | Enriched | Enriched | Enriched      | No expres     |           |
| QBWL5        | Splincine factor 3B of SF3B5         | 11.503 | 54.7 | 4  | 4  | 18.646  | 0       | 8110.4  | 4874.7  | 6024.7  | 7615.5  | 10831   | 4429    | 3256    | 4244.3  | 17566.4 | 9744.7   | Enriched  | Enriched | Enriched | Enriched      | Enriched      |           |
| QBWL5-3QBWL5 | Chitinase domain-con CHD1            | 44.94  | 41   | 25 | 14 | 6.2288  | 0       | 11820   | 8668    | 8105    | 11570   | 10540   | 109720  | 9133    | 90496   | 4904    | 9744.7   | Enriched  | Enriched | Enriched | Enriched      | No expres     |           |
| QBWL6-2QBWL6 | Protein LEM1-like LEM1L              | 42.02  | 40.9 | 3  | 3  | 18.592  | 0       | 6049    | 28492   | 21250   | 10773   | 14969   | 10773   | 10773   | 10773   | 10773   | 10773    | Enriched  | Enriched | Enriched | Enriched      | Enriched      |           |
| QBWL6-2QBWL6 | Sorbin and SH3 domo SORBS1           | 14.273 | 16   | 24 | 24 | 114.36  | 0       | 12340   | 12610   | 12620   | 119090  | 19550   | 12310   | 104120  | 119230  | 26532   | 14480    | Moderate  | Enriched | Enriched | Enriched      | No expres     |           |
| QBWL6-2QBWL6 | Junctional adhesion 3 JAM3           | 29.223 | 5    | 2  | 2  | 8.2221  | 0       | 34616   | 6018.6  | 6788.7  | 4788.1  | 5855.6  | 1915.2  | 6994.3  | 4024.8  | 5635.9  | 4685.7   | Enriched  | Enriched | Enriched | Enriched      | Enriched      |           |
| QBWL6        | Head-to-tail multimer HMGAT          | 17.602 | 37.4 | 9  | 9  | 26.297  | 0       | 16843   | 18756   | 18614   | 12865   | 29255   | 14709   | 21679   | 16489   | 91468   | 14121    | 17993     | Enriched | Enriched | Enriched      | Enriched      | Enriched  |
| QBWL5        | Sphingomyelin 1-phos SGPP1           | 49.107 | 9.5  | 5  | 5  | 5.2123  | 0       | 11140   | 9471.1  | 11862   | 8458.1  | 17083   | 6888.8  | 9698    | 6960.1  | 5534    | 9307.4   | Low       | Enriched | Enriched | Enriched      | No expres     |           |
| QBWL9        |                                      |        |      |    |    |         |         |         |         |         |         |         |         |         |         |         |          |           |          |          |               |               |           |



|             |                            |          |         |      |    |    |        |         |        |        |        |        |        |        |        |        |        |          |          |          |          |          |          |          |       |     |
|-------------|----------------------------|----------|---------|------|----|----|--------|---------|--------|--------|--------|--------|--------|--------|--------|--------|--------|----------|----------|----------|----------|----------|----------|----------|-------|-----|
| QNRX4-QNRX4 | 14 kDa phosphatase         | PHPT1    | 13,832  | 72   | 11 | 11 | 25,225 | 0       | 91774  | 57844  | 72944  | 78037  | 72953  | 126870 | 169430 | 167210 | 47914  | 88810    | Moderate | Enriched | Enriched | No       | expos    | YES      |       |     |
| QNRX5       | Serine incorporator 1      | SERC1    | 50,434  | 62   | 2  | 2  | 15,278 | 0       | 98012  | 54502  | 68118  | 10953  | 90641  | 80089  | 84533  | 84665  | 50,538 | 19,338   | No       | expos    | Enriched | Enriched | No       | expos    | YES   |     |
| QNRX7-QNRX7 | 1 and 2 domain family TRP2 | TRP2     | 36,271  | 61   | 6  | 6  | 11,422 | 0       | 91620  | 44230  | 44230  | 37660  | 37660  | 37660  | 37660  | 37660  | 36,271 | 36,271   | Moderate | Enriched | Enriched | No       | expos    | YES      |       |     |
| QNS56-QNS56 | E3 ubiquitin-protein       | TOPORS   | 11,234  | 1,2  | 1  | 1  | 2,707  | 0.00238 | 3387   | 2065   | 3478   | 22062  | 60243  | 19617  | 26211  | 14755  | 61,528 | 14,606   | Low      | No       | expos    | Moderate | Moderate | Enriched | YES   |     |
| QNS69       | Mitochondrial protein      | TOML2    | 10,521  | 59,9 | 7  | 7  | 28,474 | 0       | 55205  | 61207  | 70551  | 43643  | 10170  | 36674  | 65650  | 49350  | 34749  | 44,261   | Low      | Enriched | Enriched | No       | expos    | YES      |       |     |
| QNS80       | Lanc-like protein 2        | LANCE2   | 18,584  | 118  | 6  | 6  | 61,892 | 0       | 29636  | 19514  | 20355  | 40564  | 22389  | 38078  | 40569  | 44262  | 17,145 | 45,843   | Enriched | Enriched | Enriched | No       | expos    | YES      |       |     |
| QNS86-QNS86 | Phospholipase              | PLA2G4B  | 66,115  | 36,1 | 37 | 37 | 78,963 | 0       | 88201  | 169400 | 169400 | 169400 | 169400 | 169400 | 169400 | 169400 | 66,115 | 66,115   | Moderate | Enriched | Enriched | Enriched | No       | expos    | YES   |     |
| QNS84       | Isolectin-B4 RNA ligase    | ILRB2    | 113,739 | 31   | 34 | 34 | 98,192 | 0       | 25310  | 15210  | 180570 | 23070  | 227450 | 247850 | 271200 | 125030 | 31,710 | 170,740  | Moderate | Enriched | Enriched | Enriched | No       | expos    | YES   |     |
| QNS80-QNS80 | Kinesin light chain 4      | KLC4     | 6,379   | 167  | 10 | 10 | 18,613 | 0       | 29349  | 27137  | 30030  | 19839  | 35753  | 27026  | 33990  | 20903  | 25766  | 23,763   | 17,040   | Moderate | Enriched | Enriched | No       | expos    | YES   |     |
| QNT62-QNT62 | Ubiquitin-protein          | UBI1     | 19,416  | 131  | 13 | 13 | 14,855 | 0       | 11445  | 10911  | 11943  | 11445  | 11445  | 11445  | 11445  | 11445  | 19,416 | 19,416   | Moderate | Enriched | Enriched | Enriched | No       | expos    | YES   |     |
| QNT67-QNT67 | NAD-dependent ser          | SIRT3    | 45,373  | 135  | 5  | 5  | 13,112 | 0       | 22229  | 11335  | 14181  | 16722  | 16972  | 16626  | 15228  | 16605  | 77,245 | 15,119   | No       | expos    | Moderate | Moderate | No       | expos    | YES   |     |
| QNS18-QNS18 | Sister chromatid cohes     | PSD5B    | 15,828  | 10   | 18 | 18 | 15,793 | 0       | 56127  | 47474  | 61702  | 46522  | 63674  | 40415  | 47201  | 50294  | 23,445 | 5,908    | Moderate | Enriched | Enriched | Low      | YES      | YES      |       |     |
| QNS13-QNS13 | Alpha-mannosidase 2        | MAN2C1   | 10,489  | 4,3  | 4  | 4  | 6,110  | 0       | 14,231 | 69015  | 64742  | 43285  | 77026  | 67376  | 85755  | 83319  | 5,366  | 67,901   | Moderate | Moderate | Moderate | Enriched | Enriched | YES      |       |     |
| QNT5-QNT5   | Phospholipase              | PLA2G4C  | 66,966  | 29,1 | 20 | 20 | 78,963 | 0       | 88201  | 169400 | 169400 | 169400 | 169400 | 169400 | 169400 | 169400 | 66,966 | 66,966   | Moderate | Enriched | Enriched | Enriched | No       | expos    | YES   |     |
| QNTX5-QNTX5 | Ethylmalonate-CoA d        | EMDC2    | 31,049  | 35   | 14 | 14 | 12,234 | 0       | 61250  | 57856  | 64158  | 61484  | 59295  | 86337  | 84816  | 119510 | 40,993 | 79,933   | Enriched | Enriched | Enriched | No       | expos    | YES      |       |     |
| QNTZ7       | RNA-binding protein        | RBM12    | 97,394  | 70   | 8  | 8  | 13,272 | 0       | 20873  | 16311  | 21091  | 16207  | 21198  | 21831  | 29708  | 33701  | 13,915 | 26,524   | Moderate | Moderate | Enriched | Low      | YES      | YES      |       |     |
| QNT1        | TBC1 domain family         | TBC1D22B | 61,919  | 5,8  | 6  | 6  | 4,784  | 0       | 10721  | 5355   | 60923  | 60771  | 70803  | 57617  | 44447  | 21454  | 59,675 | Low      | Enriched | Enriched | Enriched | No       | expos    | YES      |       |     |
| QNT22       | Melanin                    | MDN1     | 1,832   | 0,8  | 3  | 3  | 7,2718 | 0       | 6697   | 6253   | 69917  | 89719  | 78161  | 92615  | 20891  | 21593  | 81559  | 10,766   | Enriched | Enriched | Enriched | Enriched | No       | expos    | YES   |     |
| QNT11-QNT11 | Acetyl-coenzyme A          | ACCS1    | 20,507  | 24,0 | 20 | 20 | 50,477 | 0       | 78938  | 56513  | 61530  | 62156  | 96207  | 51026  | 57140  | 62488  | 34,646 | 63,352   | Enriched | Enriched | Moderate | No       | expos    | YES      |       |     |
| QNT1        | Myosin-specific acid       | MYH3     | 73,552  | 35,9 | 20 | 20 | 94,981 | 0       | 124959 | 75899  | 112980 | 149190 | 127990 | 214220 | 172580 | 215980 | 73,552 | 73,552   | Moderate | Enriched | Enriched | Moderate | No       | expos    | YES   |     |
| QNT15-QNT15 | UPP1S1 protein C           | UPP1S1   | 27,524  | 12,5 | 6  | 6  | 4,8385 | 0.0043  | 16431  | 3046   | 2111   | 32076  | 15911  | 4804   | 3804   | 32585  | 24887  | 27828    | Moderate | Enriched | Enriched | No       | expos    | YES      |       |     |
| QNT7        | Probable ATP-depen         | DDB2     | 59,58   | 5,9  | 3  | 3  | 3,1342 | 0.0095  | 54494  | 40926  | 48271  | 38669  | 59255  | 41933  | 41255  | 39311  | 28938  | 47814    | Enriched | Moderate | Moderate | Low      | YES      | YES      |       |     |
| QNS15-QNS15 | Probable lysosomal e       | LMBRD1   | 21,394  | 6,9  | 1  | 1  | 21,079 | 0       | 46,012 | 41024  | 45281  | 49858  | 66018  | 52336  | 27161  | 2584   | 10211  | 48,533   | Enriched | Enriched | Enriched | No       | expos    | YES      |       |     |
| QNT1        | Biacetyl-coenzyme B        | BAC1C54  | 23,351  | 17,1 | 6  | 6  | 7,6935 | 0       | 85263  | 71751  | 61081  | 67048  | 74464  | 93346  | 109620 | 109620 | 23,351 | 23,351   | Moderate | Enriched | Enriched | Enriched | No       | expos    | YES   |     |
| QNT2-QNT2   | Hydroxymethylglu           | MGAT5    | 42,072  | 9,6  | 3  | 3  | 4,6471 | 0.00043 | 94367  | 5367   | 57372  | 10253  | 60554  | 90763  | 69995  | 92843  | 32928  | 10888    | Moderate | Low      | Enriched | No       | expos    | YES      |       |     |
| QNT13-QNT13 | Gammag-tubulin             | TXLNG    | 46,251  | 5,1  | 2  | 2  | 3,7123 | 0.0008  | 23159  | 22051  | 28359  | 10645  | 16885  | 11578  | 61013  | 50117  | 11273  | 59065    | Enriched | Enriched | Enriched | No       | expos    | YES      |       |     |
| QNT16-QNT16 | SPATS2-like protein        | SPATS2L  | 54,718  | 15,1 | 6  | 6  | 11,746 | 0       | 24,335 | 23525  | 23083  | 23625  | 28328  | 20998  | 23489  | 20696  | 12979  | 23,546   | Enriched | Enriched | Enriched | No       | expos    | YES      |       |     |
| QNT16-QNT16 | ATPase family              | ATAD4    | 79,744  | 17,4 | 9  | 9  | 35,455 | 0       | 49139  | 38026  | 4129   | 47219  | 38026  | 4129   | 47219  | 38026  | 79,744 | 79,744   | Moderate | Enriched | Enriched | Enriched | No       | expos    | YES   |     |
| QNS9-QNS9   | ESR1B1 protein             | FAM49B   | 36,748  | 22,5 | 7  | 7  | 19,614 | 0       | 31,757 | 21688  | 30042  | 23420  | 31348  | 27432  | 53358  | 61529  | 28948  | 33,824   | Enriched | Enriched | Enriched | No       | expos    | YES      |       |     |
| QNS18-QNS18 | TBC1 domain family         | TBC1D23  | 76,65   | 11   | 9  | 9  | 114,31 | 0       | 13,859 | 23579  | 22279  | 24285  | 38916  | 28082  | 19850  | 20001  | 8677   | 19,918   | Moderate | Enriched | Enriched | No       | expos    | YES      |       |     |
| QNS11       | US small nucleolar r       | BDP1     | 21,85   | 13   | 2  | 2  | 3,928  | 0.00061 | 32829  | 84554  | 7143   | 10335  | 8790   | 13371  | 11105  | 10994  | 42,578 | 11,583   | Enriched | Enriched | Enriched | No       | expos    | YES      |       |     |
| QNS15       | Protein                    | IKZF9    | 18,609  | 6,7  | 11 | 11 | 18,609 | 0       | 8201   | 60064  | 39114  | 10808  | 4704   | 52133  | 49134  | 4704   | 9024   | 8,904    | Moderate | Moderate | Enriched | Enriched | No       | expos    | YES   |     |
| QNS7-QNS7   | Exocyst complex            | EXOC1    | 10,100  | 12,3 | 12 | 12 | 24,847 | 0       | 30,324 | 1484   | 24236  | 31719  | 22821  | 31345  | 35814  | 30430  | 26858  | 34,447   | Moderate | Enriched | Enriched | No       | expos    | YES      |       |     |
| QNS15-QNS15 | Interactor complex         | INTS9    | 71,136  | 4,1  | 2  | 2  | 2,1542 | 0       | 67,886 | 4193   | 6110   | 11426  | 49367  | 96439  | 59164  | 87706  | 24,119 | 81,422   | Moderate | Enriched | Enriched | Low      | YES      | YES      |       |     |
| QNS6-QNS6   | Cell cycle protein         | ATAD5    | 66,217  | 12,2 | 8  | 8  | 36,885 | 0       | 42,960 | 38064  | 40824  | 47004  | 40824  | 47004  | 40824  | 47004  | 66,217 | 66,217   | Moderate | Enriched | Enriched | Moderate | No       | expos    | YES   |     |
| QNS4        | Transmembrane pro          | TMEM148C | 50,141  | 3    | 1  | 1  | 15,6   | 0       | 12,460 | 13136  | 15521  | 11693  | 16097  | 11576  | 54623  | 84705  | 25,218 | 83,975   | Enriched | Moderate | Enriched | No       | expos    | YES      |       |     |
| QNS15-QNS15 | Ubiquitin carboxyl t       | USP40    | 140,13  | 1,6  | 2  | 2  | 3,275  | 0.00078 | 14464  | 10205  | 11589  | 8208   | 15102  | 16152  | 1327   | 11568  | 93,138 | 12,274   | Moderate | Enriched | Moderate | No       | expos    | YES      |       |     |
| QNT7-QNT7   | Parotid gland kinase       | PANK4    | 87,99   | 11   | 8  | 8  | 47,881 | 0       | 18339  | 16621  | 22294  | 17435  | 17319  | 24632  | 44195  | 40152  | 15,318 | 26,647   | Moderate | Enriched | Enriched | No       | expos    | YES      |       |     |
| QNS18-QNS18 | Exocyst complex            | EXOC2    | 70,352  | 14,7 | 6  | 6  | 2,809  | 0       | 27,897 | 2007   | 22068  | 28748  | 36811  | 10064  | 30951  | 14184  | 10,842 | 26,320   | Enriched | Enriched | Enriched | Moderate | No       | expos    | YES   |     |
| QNH11-QNH11 | 3-O-methylsalicylic        | DNAC11   | 15,196  | 15,6 | 6  | 6  | 40,957 | 0       | 28787  | 22017  | 22068  | 18745  | 26855  | 19873  | 11500  | 22097  | 37,706 | 23,260   | Enriched | Enriched | Enriched | No       | expos    | YES      |       |     |
| QNH16-QNH16 | Trimethyllysine di         | TMLHE    | 41,537  | 7,1  | 2  | 2  | 3,9045 | 0.00061 | 7839   | 6191   | 80466  | 9402   | 83486  | 68419  | 68111  | 7450   | 35,174 | 84,082   | Low      | Moderate | Moderate | No       | expos    | YES      |       |     |
| QNT7-QNT7   | ATPase family              | ATAD5    | 66,217  | 12,2 | 8  | 8  | 36,885 | 0       | 42,960 | 38064  | 40824  | 47004  | 40824  | 47004  | 40824  | 47004  | 66,217 | 66,217   | Moderate | Enriched | Enriched | Moderate | No       | expos    | YES   |     |
| QNS12-QNS12 | ADP-ribosylation           | ABL3B    | 25,539  | 33,9 | 6  | 6  | 3,432  | 0       | 7412   | 42895  | 60959  | 72983  | 63532  | 115860 | 87733  | 81687  | 36,875 | 102,240  | Enriched | Enriched | Enriched | No       | expos    | YES      |       |     |
| QNS4        | Double homeobox            | DLX17    | 34,687  | 3,6  | 1  | 1  | 3,2395 | 0.00077 | 40167  | 50918  | 52476  | 28746  | 62488  | 26986  | 40076  | 37931  | 38642  | 45,074   | No       | expos    | No       | expos    | No       | expos    | YES   |     |
| QNS16-QNS16 | Protein sander             | ASUN     | 64,840  | 5,3  | 3  | 3  | 3,9768 | 0.00062 | 17856  | 13285  | 15870  | 16265  | 16488  | 10833  | 15538  | 17753  | 37,823 | 15,145   | Enriched | Enriched | Enriched | Low      | Moderate | No       | expos | YES |
| QNS18       | Guanine nucleotide         | GNAS1    | 65,572  | 12,5 | 2  | 2  | 4,126  | 0.00062 | 17474  | 11749  | 1944   | 1412   | 1784   | 16118  | 13742  | 13315  | 15,735 | Moderate | Low      | Enriched | Enriched | Low      | Moderate | No       | expos | YES |
| QNS11       | ATP-dependent RNA          | DDX18    | 25,406  | 17,8 | 13 | 13 | 39,565 | 0       | 56263  | 43821  | 47978  | 51769  | 40958  | 51504  | 55186  | 65230  | 30,600 | 61,524   | Enriched | Enriched | Enriched | Low      | YES      | YES      |       |     |
| QNS2-QNS2   | QSOX5; 2S ribosomal        | MRPS18A  | 12,128  | 12,8 | 2  | 2  | 3,913  | 0.00077 | 2303   | 2935   | 3247   | 2077   | 4975   | 30414  | 3289   | 29636  | 27,029 | 52,453   | Enriched | Enriched | Enriched | No       | expos    |          |       |     |

|                |                                    |         |      |    |    |         |          |         |         |         |         |         |         |         |         |         |          |          |            |          |          |          |            |        |
|----------------|------------------------------------|---------|------|----|----|---------|----------|---------|---------|---------|---------|---------|---------|---------|---------|---------|----------|----------|------------|----------|----------|----------|------------|--------|
| Q0UBP2-Q0UB1F  | Coatomer subunit $\beta$ COPG2     | 81,482  | 17.1 | 20 | 6  | 25,865  | 0        | 22,587  | 10,961  | 1,941   | 37,029  | 13,947  | 36,603  | 28,520  | 5,806   | 14,944  | 32,751   | Low      | Low        | Moderate | No       | enriched | YES        |        |
| Q0UBQ0         | C-type nupcase rosc MR2C           | 166,67  | 5.1  | 9  | 0  | 10,681  | 0        | 18,611  | 18,619  | 24,981  | 23,538  | 31,993  | 14,650  | 33,244  | 26,290  | 21,251  | 28,144   | Moderate | Moderate   | Enriched | Enriched | Moderate | YES        |        |
| Q0UBB6         | Granulin B                         | 8,006   | 6.1  | 7  | 1  | 1,778   | 0        | 1,778   | 1,778   | 1,778   | 1,778   | 1,778   | 1,778   | 1,778   | 1,778   | 1,778   | 1,778    | 1,778    | 1,778      | 1,778    | 1,778    | 1,778    | 1,778      | 1,778  |
| Q0UBB9         | Headcase protein he HECA           | 58,836  | 4.8  | 2  | 2  | 6,377   | 0        | 42,331  | 3,864   | 5,065   | 27,647  | 61,497  | 23,042  | 21,978  | 14,432  | 24,681  | 39,262   | Enriched | Enriched   | Enriched | Enriched | No       | enrichment | YES    |
| Q0UBK3-Q0UB1F  | Methionine synthase MTRR           | 67,207  | 17.1 | 1  | 1  | 1,837   | 0.0059   | 37,368  | 14,534  | 19,225  | 28,183  | 25,635  | 33,853  | 28,077  | 23,758  | 19,767  | 27,745   | Enriched | Enriched   | Enriched | Enriched | Moderate | YES        |        |
| Q0UBL3-Q0UB1F  | Set1/Asf1 histone H3 ASH1          | 76,027  | 12.9 | 8  | 8  | 17,471  | 0        | 24,399  | 24,203  | 33,684  | 40,323  | 63,877  | 23,892  | 21,426  | 21,058  | 11,908  | 27,138   | Enriched | Enriched   | Enriched | Enriched | Moderate | YES        |        |
| Q0UBM7-Q0UB1F  | Histone H2B variant H2BAC          | 114,126 | 13.2 | 2  | 2  | 4,908   | 0.0778   | 29,161  | 31,683  | 39,716  | 47,514  | 55,414  | 21,713  | 23,859  | 24,668  | 11,418  | 18,128   | Enriched | Enriched   | Enriched | Enriched | Moderate | YES        |        |
| Q0UBP6-P8VSD9P | IRNA (maternal-NT) METTL1          | 31,471  | 6.9  | 2  | 2  | 2,943   | 0.00169  | 2,967   | 2,810   | 27,597  | 19,168  | 30,631  | 30,081  | 35,950  | 27,907  | 20,124  | 36,873   | Enriched | Enriched   | Enriched | Enriched | Moderate | YES        |        |
| Q0UBP9-Q0UB1F  | PTP domain-containing GULP1        | 33,333  | 10.7 | 3  | 3  | 6,524   | 0        | 64,122  | 34,511  | 50,648  | 80,149  | 107,324 | 32,249  | 30,006  | 38,669  | 6,305   | 52,971   | Enriched | Enriched   | Enriched | Enriched | Low      | YES        |        |
| Q0UBS2-QUB1F   | Fukuyama I-deficient FUK1          | 25,549  | 6.3  | 1  | 1  | 913     | 0        | 913     | 913     | 913     | 913     | 913     | 913     | 913     | 913     | 913     | 913      | 913      | 913        | 913      | 913      | 913      | 913        | 913    |
| Q0UB7-Q0UB56   | Glyoxylate reductase CRTZ          | 35,668  | 40.9 | 25 | 25 | 12,116  | 0        | 10,200  | 7,382   | 7,359   | 10,547  | 10,180  | 9,741   | 11,240  | 11,820  | 6,707   | 10,140   | Enriched | Enriched   | Enriched | Enriched | Moderate | YES        |        |
| Q0UB82         | Cathepsin Z                        | 33,868  | 14.5 | 4  | 4  | 2,213   | 0        | 2,359   | 1,601   | 1,699   | 2,365   | 2,026   | 13,138  | 6,997.8 | 11,029  | 36,441  | 10,246   | Moderate | Low        | Moderate | Enriched | Moderate | YES        |        |
| Q0UBS0         | Ribosomal protein S2 RPS8K2        | 53,455  | 25.1 | 1  | 1  | 2,076   | 0.0009   | 41,131  | 5,667.1 | 57,146  | 36,865  | 73,738  | 39,893  | 56,437  | 32,168  | 34,629  | 42,607   | Moderate | Low        | Moderate | Moderate | Enriched | YES        |        |
| Q0UBS3         | Dual homology subunit DHA1         | 25,518  | 6.3  | 1  | 1  | 8,724   | 0        | 23,535  | 25,898  | 34,139  | 37,511  | 55,414  | 33,858  | 49,698  | 20,044  | 18,647  | 35,858   | Enriched | Enriched   | Enriched | Enriched | Moderate | YES        |        |
| Q0UBS4         | Dual homology subunit DNAU11       | 40,513  | 34.6 | 23 | 23 | 3,233.1 | 0        | 22,530  | 15,600  | 16,510  | 22,290  | 194,110 | 244,110 | 194,480 | 194,480 | 78,154  | 180,870  | Enriched | Enriched   | Enriched | Enriched | No       | enrichment | YES    |
| Q0UBS8-Q0UBS   | E3 ubiquitin protein RNF14         | 39,633  | 5.5  | 2  | 2  | 3,784   | 0.0006   | 77,812  | 63,241  | 82,555  | 53,54   | 10,484  | 5,431.9 | 10,151  | 7,600.5 | 5,384   | 68,568   | Low      | Moderate   | Enriched | Enriched | Moderate | YES        |        |
| Q0UBT2-Q0UB2   | SUMO activating enzyme SACS        | 71,223  | 13.3 | 10 | 10 | 17,221  | 0        | 82,179  | 40,908  | 72,843  | 85,305  | 73,558  | 107,780 | 112,200 | 68,578  | 96,507  | Moderate | Enriched | Enriched   | Enriched | Enriched | Enriched | YES        |        |
| Q0UBU3-Q0UB1F  | Arp2/3-essential GIBL              | 11,656  | 5.1  | 7  | 7  | 5,902   | 0        | 7,782   | 46,438  | 52,436  | 47,952  | 38,596  | 27,200  | 19,977  | 22,491  | 18,733  | 24,024   | Enriched | Enriched   | Enriched | Enriched | No       | enrichment | YES    |
| Q0UBU6         | Protein FAM8A1                     | 44,123  | 11.1 | 3  | 3  | 11,195  | 0        | 12,718  | 19,971  | 10,854  | 11,478  | 15,897  | 94,109  | 9,766   | 97,267  | 6,285   | 10,879   | Enriched | Enriched   | Enriched | Enriched | Enriched | YES        |        |
| Q0UBV2         | Protein w-1 homolo SELL1           | 88,754  | 25.2 | 20 | 20 | 24,474  | 0        | 83,321  | 70,643  | 74,448  | 79,073  | 96,238  | 81,993  | 72,760  | 71,595  | 4,077   | 76,739   | Enriched | Enriched   | Enriched | Enriched | Moderate | YES        |        |
| Q0UBV8         | Protein                            | 30,381  | 10.6 | 8  | 8  | 5,823   | 0.0174   | 20,526  | 15,937  | 23,805  | 14,642  | 23,627  | 51,004  | 34,893  | 24,208  | 20,954  | 10       | Enriched | Enriched   | Enriched | Enriched | No       | enrichment | YES    |
| Q0UBV8-F8H7C6  | COP9 silencing core COP2A          | 30,276  | 21.5 | 5  | 5  | 28,377  | 0        | 12,778  | 8,899.5 | 10,646  | 9,429.2 | 13,005  | 9,980.9 | 10,024  | 11,324  | 5,937.7 | 10,210   | Low      | Enriched   | Enriched | Enriched | Moderate | YES        |        |
| Q0UD11-Q0UB1F  | Protein phosphatase 1 PPP1R1B      | 22,963  | 35.3 | 7  | 7  | 47,466  | 0        | 25,883  | 27,702  | 37,311  | 29,988  | 30,843  | 38,616  | 35,270  | 27,530  | 24,316  | 36,648   | Enriched | Enriched   | Enriched | Enriched | No       | enrichment | YES    |
| Q0UD83-F8H7E5  | Alb1b subunit of the AKS           | 10,213  | 13.3 | 10 | 10 | 47,035  | 0        | 57,713  | 44,179  | 50,575  | 42,675  | 62,554  | 43,024  | 47,919  | 50,030  | 28,728  | 48,258   | No       | enrichment | Low      | Enriched | No       | enrichment | YES    |
| Q0UDT6-Q0UD11  | CAP-Gly domain-containing CLDP2    | 11,778  | 9.3  | 9  | 9  | 4,339   | 0        | 23,534  | 23,606  | 25,243  | 23,400  | 31,871  | 20,440  | 24,433  | 21,512  | 15,793  | 22,461   | Moderate | Moderate   | Moderate | Enriched | Enriched | YES        |        |
| Q0UDU1-Q0UDW   | Cytochrome b-1 core LQC0R10        | 7,384   | 27   | 4  | 4  | 36,399  | 0        | 18,978  | 17,711  | 23,597  | 20,561  | 20,289  | 12,758  | 35,473  | 42,664  | 16,896  | 41,652   |          |            |          |          |          |            |        |
| Q0UDU2-Q0UD11  | Tiase junction protein TJP1        | 13,317  | 21.2 | 22 | 22 | 13,008  | 0        | 55,597  | 50,450  | 66,522  | 52,019  | 78,853  | 50,811  | 14,690  | 12,070  | 9,566   | 7,674    | Enriched | Enriched   | Enriched | Enriched | Enriched | YES        |        |
| Q0UDU3-Q0UB1F  | Dual homology subunit DHA1         | 37,406  | 9    | 9  | 9  | 4,339   | 0        | 18,978  | 17,711  | 23,597  | 20,561  | 20,289  | 12,758  | 35,473  | 42,664  | 16,896  | 41,652   |          |            |          |          |          |            |        |
| Q0UE9E-Q0UE9E  | Craniofacial development CTFP2     | 33,592  | 17.7 | 5  | 5  | 11,041  | 0        | 61,749  | 20,563  | 18,330  | 19,719  | 21,979  | 23,929  | 14,749  | 13,492  | 17,754  | 13,667   | Low      | Enriched   | Enriched | Enriched | Enriched | YES        |        |
| Q0UEU9-Q0UE9E  | Vesicle transport factor VTI1B     | 26,688  | 25.9 | 5  | 5  | 12,013  | 0        | 61,749  | 5,658   | 5,479.5 | 43,531  | 71,959  | 45,348  | 45,309  | 41,707  | 27,933  | 41,452   | Enriched | Enriched   | Enriched | Enriched | Moderate | YES        |        |
| Q0UEW8-Q0UB1F  | STE203-related STK39               | 55,957  | 16.2 | 9  | 9  | 35,361  | 0        | 13,356  | 26,800  | 28,919  | 31,918  | 34,100  | 30,001  | 31,957  | 30,121  | 17,558  | 26,743   | Enriched | Enriched   | Enriched | Enriched | Moderate | YES        |        |
| Q0UEZ3-Q0A08   | Gummi-like protein GUM1            | 75,477  | 29.7 | 4  | 4  | 11,720  | 0        | 117,620 | 80,230  | 149,180 | 176,611 | 154,163 | 169,689 | 149,840 | 129,646 | 162,747 | 167,130  | Enriched | Enriched   | Enriched | Enriched | Enriched | YES        |        |
| Q0UFCD         | Leucine-rich repeat LRWD1          | 70,846  | 4.8  | 4  | 4  | 3,528   | 0.00022  | 21,874  | 11,226  | 11,264  | 15,314  | 18,677  | 184.32  | 158.14  | 126.19  | 755.99  | 10,973   | Moderate | Enriched   | Enriched | Enriched | No       | enrichment | YES    |
| Q0UFN0         | Protein Nup360 from NUP360         | 28,466  | 22.7 | 6  | 6  | 26,781  | 0        | 26,836  | 16,798  | 21,544  | 22,728  | 31,057  | 19,675  | 18,835  | 20,443  | 10,959  | 18,070   | Moderate | Low        | Moderate | Enriched | Enriched | YES        |        |
| Q0UFW3-Q0UB1F  | COP9 silencing core COP2A          | 92,207  | 32.1 | 10 | 10 | 11,117  | 0        | 10,911  | 13,448  | 16,577  | 97,121  | 23,220  | 10,607  | 21,996  | 21,657  | 8,802   | 14,866   | Enriched | Enriched   | Enriched | Enriched | No       | enrichment | YES    |
| Q0UG3-Q0UG63   | ATP-binding cassette ABCF2         | 71,289  | 12.8 | 9  | 9  | 13,762  | 0        | 11,463  | 10,120  | 9,939.2 | 12,789  | 12,879  | 13,892  | 40,046  | 49,825  | 12,669  | 13,900   | Moderate | Enriched   | Enriched | Enriched | Enriched | YES        |        |
| Q0UG8          | Testin                             | 47,996  | 39.7 | 23 | 23 | 1,249   | 0.000378 | 31,474  | 239.6   | 26,877  | 183.1   | 370.6   | 1,421   | 370     | 235.0   | 260.3   | 316.7    | Enriched | Enriched   | Enriched | Enriched | Moderate | YES        |        |
| Q0UGB2         | Testin                             | 47,996  | 40.3 | 23 | 23 | 1,249   | 0        | 11,950  | 8,941   | 9,160   | 70,648  | 116,740 | 99,916  | 116,630 | 121,690 | 61,681  | 109,520  | Enriched | Enriched   | Enriched | Enriched | Enriched | YES        |        |
| Q0UGM6         | Transcription factor RFX2          | 40,146  | 16.6 | 26 | 26 | 76,546  | 0        | 10,382  | 18,441  | 7,317   | 28,939  | 46,622  | 23,627  | 29,947  | 28,947  | 29,947  | 29,947   | Enriched | Enriched   | Enriched | Enriched | Enriched | YES        |        |
| Q0UGP8         | Transcription protein SEC3         | 86,993  | 32.4 | 26 | 26 | 76,546  | 0        | 11,920  | 12,020  | 12,800  | 13,160  | 16,920  | 19,470  | 15,010  | 11,990  | 5,979   | 13,870   | Enriched | Enriched   | Enriched | Enriched | Enriched | YES        |        |
| Q0UGR2-Q0UG1F  | Zinc finger CCHC domain ZC7H107    | 109,86  | 1    | 1  | 1  | 2,621   | 0.00023  | 20,266  | 25,569  | 23,322  | 27,261  | 27,871  | 19,841  | 16,756  | 26,617  | 67,511  | 28,227   | Enriched | Low        | Moderate | Low      | Enriched | YES        |        |
| Q0UGT4         | Small domain-containing RFX2       | 94,422  | 1    | 1  | 1  | 10,615  | 0        | 10,615  | 10,615  | 10,615  | 10,615  | 10,615  | 10,615  | 10,615  | 10,615  | 10,615  | 10,615   | 10,615   | 10,615     | 10,615   | 10,615   | 10,615   | 10,615     | 10,615 |
| Q0UGV2-Q0UE10  | Protein NDRG3                      | 41,408  | 11.7 | 4  | 4  | 1,454   | 0.00003  | 3,625   | 21,179  | 21,482  | 23,989  | 28,066  | 20,543  | 22,676  | 20,432  | 15,701  | 22,135   | Enriched | Enriched   | Enriched | Enriched | No       | enrichment | YES    |
| Q0UH62         | Armadillo repeat-containing ARMAD3 | 62,59   | 9.8  | 3  | 3  | 9,574   | 0        | 16,452  | 14,410  | 15,062  | 20,462  | 12,965  | 14,908  | 12,294  | 11,177  | 11,189  | 13,812   | Enriched | Enriched   | Enriched | Enriched | No       | enrichment | YES    |
| Q0UH95-F8H7E1  | Succinylated protein SWAP70        | 18,997  | 19.7 | 12 | 12 | 18,697  | 0        | 15,457  | 4,680   | 5,794   | 5,711   | 5,402   | 4,221   | 10,900  | 9,212   | 51,296  | 52,889   | Low      | Enriched   | Low      | Enriched | Low      | Enriched   | YES    |
| Q0UH99-Q0UH99  | SLE1 domain-containing SLE1        | 30,381  | 30.2 | 18 | 18 | 67,498  | 0        | 72,587  | 65,908  | 66,640  | 82,562  | 66,640  | 74,529  | 62,947  | 62,947  | 62,947  | 62,947   | Enriched | Enriched   | Enriched | Enriched | No       | enrichment | YES    |
| Q0UH99-Q0UB1F  | LIM domain and actin LIM1/FRM1     | 80,725  | 34.3 | 31 | 31 | 136,888 | 0        | 112,800 | 107,110 | 111,580 | 109,900 | 126,920 | 107,020 | 123,470 | 148,720 | 82,189  | 134,330  | Enriched | Enriched   | Enriched | Enriched | No       | enrichment | YES</  |

|                                                         |         |      |    |         |         |         |         |         |         |          |         |         |         |         |         |            |            |            |          |               |               |            |
|---------------------------------------------------------|---------|------|----|---------|---------|---------|---------|---------|---------|----------|---------|---------|---------|---------|---------|------------|------------|------------|----------|---------------|---------------|------------|
| QVY29-3QV275 V-set and immunoglobulin VSG4              | 33,857  | 5.2  | 1  | 1,882.7 | 0.00846 | 19,974  | 12,166  | 14,901  | 61,699  | 1,610    | 2,887.4 | 1,956.4 | 3,215.2 | 15,047  | 32,707  | Enriched   | Moderate   | Moderate   | Moderate | YES           |               |            |
| QVY29-3QV281 Cofilin-2                                  | 10,546  | 5.57 | 14 | 6       | 39,203  | 0       | 15,565  | 15,538  | 16,610  | 15,238   | 18,669  | 33,311  | 35,116  | 29,245  | 11,642  | 15,212     | Low        | Enriched   | Enriched | No express    |               |            |
| QVY294 Histone H2B core A1                              | 22,968  | 4.9  | 1  | 1,102.6 | 0.00676 | 18,828  | 10,278  | 10,663  | 12,963  | 12,963   | 12,963  | 12,963  | 12,963  | 12,963  | 11,328  | No express | Enriched   | Enriched   | Enriched | No express    |               |            |
| QVY295 Developmentally-regulated CRTG2                  | 40,542  | 34.1 | 17 | 17      | 54,488  | 0       | 9,587   | 84,995  | 84,806  | 81,405   | 104,200 | 68,744  | 107,790 | 116,650 | 56,326  | 81,756     | Enriched   | Enriched   | Enriched | Enriched      |               |            |
| QVY297-0VY247 Nk-associated protein NCK1P2              | 12,879  | 21.2 | 33 | 33      | 65,807  | 0       | 136,240 | 107,970 | 116,690 | 101,250  | 152,110 | 83,531  | 98,465  | 101,230 | 90,349  | 104,200    | Low        | Enriched   | Enriched | Enriched      |               |            |
| QVY298 Protein-conjugation factor CNDP2                 | 20,625  | 66.5 | 24 | 1       | 2,103   | 0.00675 | 10,762  | 9,842   | 11,819  | 11,819   | 12,237  | 25,204  | 29,311  | 29,656  | 50,529  | 14,414     | Enriched   | Enriched   | Enriched | Enriched      |               |            |
| QVY299 Zinc finger protein ZFP191                       | 69,143  | 3.6  | 0  | 2       | 13,365  | 0       | 11,014  | 6,107   | 11,014  | 6,107    | 11,014  | 6,107   | 11,014  | 6,107   | 47,911  | 60,954     | Enriched   | Enriched   | Enriched | No expression |               |            |
| QVY299-2QVY296 Caspase recruitment 1 CARD4              | 32,368  | 10.1 | 2  | 2       | 2,195   | 0.00662 | 19,833  | 19,408  | 22,947  | 15,469   | 19,427  | 38,546  | 38,546  | 37,973  | 5,921   | 43,034     | Moderate   | Low        | Moderate | Enriched      |               |            |
| QVY299-3QVY218 Disk large-associated protein 1 DLAGAP1  | 49,478  | 10.6 | 6  | 5       | 19,900  | 0       | 21,047  | 18,105  | 23,968  | 14,617   | 21,096  | 26,600  | 25,234  | 27,716  | 14,263  | 23,043     | Enriched   | Enriched   | Enriched | Enriched      |               |            |
| QVY299-4QVY218 Serine/threonine phosphatase 1 SH-PTP2   | 43,117  | 21   | 2  | 2       | 1,800   | 0.00114 | 6,167   | 6,167   | 6,167   | 6,167    | 6,167   | 6,167   | 6,167   | 6,167   | 48,986  | 47,911     | 20.24      | 64,055     | Moderate | Enriched      | Enriched      |            |
| QVY299-5QVY218 Fibronectin type-III FNDC14              | 102,784 | 11.8 | 14 | 14      | 117,337 | 0       | 76,420  | 60,800  | 65,640  | 46,761   | 95,055  | 48,891  | 46,006  | 41,164  | 26,524  | 49,984     | Moderate   | Enriched   | Enriched | Enriched      |               |            |
| QVY299-FRZY210 TBC1 domain family member TBC1D10        | 12,574  | 6.8  | 5  | 5       | 41,878  | 0       | 26,688  | 19,134  | 19,291  | 21,180   | 23,618  | 20,957  | 21,992  | 22,107  | 13,205  | 21,054     | Low        | Moderate   | Low      | Enriched      |               |            |
| QVY299-2JAOIM04 Band 4.1 E protein EPB41L3              | 96,517  | 15.7 | 13 | 12      | 42,783  | 0       | 28,895  | 29,727  | 35,501  | 29,409   | 42,033  | 31,120  | 34,106  | 26,516  | 24,648  | 32,771     | No express | No express | Enriched | Enriched      |               |            |
| QVY299-LZQZC03 Eucyosine complex csc DRP1               | 49,199  | 94.5 | 8  | 8       | 23,365  | 0       | 15,962  | 12,230  | 15,768  | 9,968    | 15,962  | 15,962  | 15,962  | 15,962  | 115,749 | 86,515     | 11,528     | Moderate   | Enriched | Enriched      | No express    |            |
| QVY299-0VY203 Glutathione S-transferase GSTP1           | 25,453  | 44.7 | 16 | 16      | 96,778  | 0       | 91,025  | 61,449  | 68,454  | 114,000  | 78,847  | 128,710 | 138,990 | 232,120 | 16,285  | 167,200    | Enriched   | Enriched   | Enriched | No express    |               |            |
| QVY299-0VY205 Raxletaxer complex pcc LAMTOR2            | 13,507  | 25.6 | 4  | 4       | 6,800   | 0       | 61,818  | 61,079  | 74,879  | 79,774   | 53,267  | 46,871  | 44,346  | 61,733  | 5801.8  | 61,716     | 11.57      | 11,571     | Enriched | Enriched      | No express    |            |
| QVY299-HYAT2 28S ribosomal protein MRP25C               | 20,843  | 1.7  | 2  | 2       | 2,191   | 0.0095  | 50,537  | 46,647  | 47,845  | 47,845   | 47,845  | 47,845  | 47,845  | 47,845  | 100,818 | 27,831     | Moderate   | Enriched   | Enriched | No express    |               |            |
| QVY299-KEV00 Cytosolic $\alpha$ -tubulin COA3           | 11,731  | 26.4 | 4  | 4       | 8,937.1 | 0       | 10,259  | 11,994  | 13,828  | 14,141   | 16,607  | 16,251  | 15,569  | 25,985  | 7584.9  | 14,507     | 11.36      | 11,360     | Enriched | Enriched      | No express    |            |
| QVY299-2QVY295 Lambda crystallin hCrv1                  | 33,358  | 19.9 | 11 | 11      | 31,488  | 0       | 50,530  | 29,852  | 35,665  | 42,302   | 36,855  | 52,320  | 49,255  | 51,434  | 26,249  | 55,248     | Enriched   | Enriched   | Enriched | Enriched      |               |            |
| QVY299 Translation machinery TM7L7                      | 7,062   | 39.1 | 5  | 5       | 5,755   | 0       | 25,428  | 10,299  | 23,553  | 41,963   | 17,988  | 22,243  | 26,013  | 10,006  | 25,200  | 39,718     | 11.57      | 11,571     | Enriched | Enriched      | No express    |            |
| QVY299-HYD09 Polymerase delta subunit POL32             | 42,613  | 14   | 4  | 4       | 9,899.6 | 0       | 35,201  | 29,117  | 40,646  | 33,649   | 45,966  | 42,467  | 35,612  | 28,732  | 30,519  | 26,696     | Enriched   | Enriched   | Enriched | Enriched      |               |            |
| QVY299 AP-3 complex subunit AP3M1                       | 46,239  | 21.9 | 9  | 9       | 54,139  | 0       | 14,699  | 84,679  | 90,934  | 92,923   | 127,980 | 107,170 | 79,993  | 81,050  | 37,024  | 96,463     | Enriched   | Enriched   | Enriched | No express    |               |            |
| QVY298 Inner nuclear membrane LEMD3                     | 99,996  | 6    | 4  | 4       | 13,697  | 0       | 13,624  | 15,399  | 16,829  | 13,882   | 21,277  | 87,311  | 12,254  | 15,951  | 6,712   | 13,841     | Enriched   | Enriched   | Enriched | No express    |               |            |
| QVY292 Calcium-regulated protein CARM1                  | 15,442  | 2.2  | 2  | 2       | 2,191   | 0       | 4,638.5 | 4,638.5 | 4,638.5 | 31,578.5 | 91,232  | 38,223  | 30,957  | 45,872  | 24,774  | 54,031     | Enriched   | Enriched   | Enriched | No express    |               |            |
| QVY291 Thyroid hormone receptor THRAP3                  | 108,166 | 17.6 | 19 | 18      | 190,266 | 0       | 112,990 | 80,630  | 97,766  | 95,733   | 123,690 | 113,630 | 140,270 | 128,520 | 79,794  | 146,620    | Enriched   | Enriched   | Enriched | No express    |               |            |
| QVY299-HYD09 WW domain-binding WBP1.1                   | 69,997  | 10.8 | 6  | 6       | 20,292  | 0       | 13,071  | 9,568.5 | 10,860  | 14,217   | 10,701  | 14,697  | 14,715  | 14,645  | 8,984.4 | 14,645     | Enriched   | Enriched   | Enriched | No express    |               |            |
| QVY293 QVY299-2QVY296 Suppressor of G2 allele SUGF5     | 59,578  | 44.8 | 29 | 29      | 121.8   | 0       | 23,582  | 19,970  | 20,180  | 14,740   | 23,940  | 16,290  | 18,420  | 19,180  | 10,770  | 17,600     | Enriched   | Enriched   | Enriched | No express    |               |            |
| QVY299-3QVY292 Adenovirus protein 1A                    | 17,711  | 26.3 | 17 | 17      | 10,417  | 0       | 2,295.1 | 1,217.1 | 1,217.1 | 1,217.1  | 1,217.1 | 1,217.1 | 1,217.1 | 1,217.1 | 17,045  | 20,555     | Enriched   | Enriched   | Enriched | No express    |               |            |
| QVY299-2QVY292 Suppressor of G2 allele SUGF5            | 37,804  | 32.4 | 13 | 13      | 64,474  | 0       | 61,852  | 51,445  | 53,000  | 72,100   | 62,233  | 49,821  | 63,184  | 71,034  | 70,382  | 70,382     | Enriched   | Enriched   | Enriched | No express    |               |            |
| QVY299-4QVY296 Tyrosine-tRNA ligase YARS2               | 53,198  | 12.4 | 8  | 8       | 31,129  | 0       | 77,379  | 56,714  | 70,712  | 92,236   | 71,442  | 7,021   | 80,280  | 83,157  | 46,304  | 86,351     | Enriched   | Moderate   | Moderate | No express    |               |            |
| QVY299-3QVY292 Putative Nucleoside diphosphate kinase 2 | 45,347  | 13   | 4  | 4       | 5,191.7 | 0.00044 | 9,562   | 9,064   | 14,482  | 12,920   | 19,805  | 20,020  | 19,973  | 13,050  | 20,970  | 10,292     | 19,293     | Enriched   | Enriched | Low           | No expression |            |
| QVY299-0VY295 Activator protein 1 AP1                   | 49,903  | 36.9 | 21 | 21      | 13,365  | 0       | 15,962  | 12,230  | 15,768  | 9,968    | 15,962  | 15,962  | 15,962  | 15,962  | 63,344  | 63,344     | Enriched   | Enriched   | Enriched | Enriched      |               |            |
| QVY299-5QVY296 Putative dehydrogenase DERA              | 35,23   | 25.2 | 12 | 12      | 23,322  | 0       | 45,770  | 37,672  | 41,969  | 36,688   | 53,856  | 32,196  | 38,704  | 33,843  | 23,555  | 39,750     | Enriched   | Enriched   | Enriched | No express    |               |            |
| QVY299-3QVY296 Protein MEMO1                            | 31,307  | 4.7  | 1  | 1       | 1,966.4 | 0.00787 | 48,007  | 51,94   | 54,522  | 29,651   | 74,123  | 41,737  | 80,787  | 64,564  | 42,676  | 47,948     | Enriched   | Enriched   | Enriched | No express    |               |            |
| QVY299-2QVY292 Threonine-specific phosphatase 1         | 29,642  | 7.1  | 2  | 2       | 2,191   | 0       | 5,016   | 4,858.5 | 5,016   | 5,016    | 5,016   | 5,016   | 5,016   | 5,016   | 18,277  | 18,277     | Enriched   | Enriched   | Enriched | No express    |               |            |
| QVY299-3QVY292 U6 snRNA-associated LSM2                 | 10,834  | 37.9 | 7  | 7       | 19,552  | 0       | 12,426  | 11,008  | 14,274  | 29,649   | 13,985  | 12,955  | 13,776  | 20,156  | 8,605   | 15,554     | Low        | Moderate   | Enriched | Enriched      |               |            |
| QVY299-3QVY292 Endophilin B1                            | 51,218  | 25.7 | 8  | 8       | 1,048.2 | 0.00132 | 36,676  | 37,824  | 38,718  | 38,718   | 49,426  | 26,902  | 27,097  | 30,594  | 23,74   | 27,402     | Moderate   | Enriched   | Enriched | Enriched      |               |            |
| QVY299-AD087X Calcium-binding protein CAB39             | 39,869  | 21.7 | 11 | 11      | 31,603  | 0       | 54,759  | 37,453  | 37,999  | 49,824   | 42,999  | 52,101  | 46,879  | 66,241  | 22,901  | 50,000     | Enriched   | Enriched   | Enriched | No express    |               |            |
| QVY299-3QVY293 Putative RNA-binding protein RPL27C      | 46,413  | 27.4 | 14 | 14      | 21,467  | 0       | 21,467  | 21,467  | 21,467  | 21,467   | 21,467  | 21,467  | 21,467  | 21,467  | 33,443  | 41,658     | Enriched   | Enriched   | Enriched | Moderate      |               |            |
| QVY299-3QVY293 Ubiquitin-conjugating protein UBE2J      | 31,988  | 8.8  | 3  | 3       | 7,473.6 | 0       | 20,913  | 17,699  | 18,663  | 19,902   | 25,370  | 12,824  | 14,135  | 14,147  | 8,306.6 | 17,722     | Enriched   | Enriched   | Enriched | Enriched      |               |            |
| QVY299-3QVY293 28S ribosomal protein MRP25              | 33,249  | 6.1  | 1  | 1       | 3,305   | 0.00078 | 37,407  | 42,573  | 34,615  | 29,675   | 84,599  | 23,698  | 24,175  | 16,894  | 4,596   | 35,403     | Low        | Enriched   | Enriched | No express    |               |            |
| QVY299-3QVY293 Polkoxin U3 small subunit PPK2L          | 30,446  | 11.1 | 2  | 2       | 1,392.5 | 0       | 11,965  | 11,965  | 11,965  | 11,965   | 11,965  | 11,965  | 11,965  | 11,965  | 11,965  | 11,965     | Enriched   | Enriched   | Enriched | No expression |               |            |
| QVY299-AD087X Ribosome maturation SBF2                  | 28,763  | 39.2 | 16 | 16      | 57,526  | 0       | 85,466  | 63,077  | 81,062  | 72,656   | 84,110  | 112,900 | 148,610 | 132,670 | 15,856  | 158,550    | Moderate   | Enriched   | Enriched | No express    |               |            |
| QVY299 Transmembrane csc TM7L7                          | 26,005  | 14   | 7  | 7       | 70.37   | 0       | 4,069   | 13,574  | 21,442  | 61,800   | 21,983  | 25,898  | 18,001  | 23,788  | 94,605  | 32,944     | Moderate   | Enriched   | Enriched | Enriched      |               |            |
| QVY299 Splice factor 3B subunit SF3B3                   | 14,585  | 40   | 7  | 7       | 24,139  | 0       | 24,862  | 17,160  | 22,401  | 18,729   | 24,908  | 30,739  | 76,974  | 44,744  | 41,327  | 31,932     | 11.57      | 11,571     | Enriched | Low           | Moderate      | No express |
| QVY299 RRP15B RNA polymerase II RPB15                   | 31,484  | 20.1 | 3  | 3       | 7,603.4 | 0       | 21,746  | 18,413  | 20,414  | 21,746   | 21,746  | 21,746  | 21,746  | 21,746  | 12,311  | 23,311     | Moderate   | Low        | Moderate | No express    |               |            |
| QVY299-3QVY293 Nuclear pore protein NUP166              | 21,188  | 30.3 | 6  | 6       | 27,183  | 0       | 42,448  | 25,139  | 33,326  | 35,576   | 45,993  | 41,377  | 36,971  | 49,791  | 16,276  | 44,345     | Moderate   | Moderate   | Moderate | Moderate      |               |            |
| QVY299-3QVY293 EKC/EKFPs complex TRPKB                  | 16,093  | 39.4 | 6  | 6       | 12,663  | 0       | 12,602  | 13,314  | 13,314  | 13,314   | 15,877  | 97,441  | 11,958  | 11,412  | 11,857  | 541.3      | 12,687     | Moderate   | Moderate | Moderate      | No express    |            |
| QVY299-3QVY293 Peptidyl-prolyl isomerase PPI1           | 20,237  | 24.4 | 6  | 6       | 29,844  | 0       | 24,299  | 16,554  | 24,288  | 23,015   | 24,995  | 21,601  | 38,803  | 23,227  | 20,474  | 29,164     | No express | Moderate   | Enriched | No express    |               |            |
| QVY299 Ubiquitin-fold modifier UFM1                     | 19,458  | 25.7 | 8  | 8       | 16,187  | 0       | 54,391  | 39,459  | 49,044  | 41,009   | 69,792  | 98,574  | 77,993  | 99,238  | 44,526  | 54,407     | Enriched   | Enriched   | Enriched | No express    |               |            |
| QVY299-3QVY293 Mitotic spindle-associated FAM9          |         |      |    |         |         |         |         |         |         |          |         |         |         |         |         |            |            |            |          |               |               |            |

<sup>a</sup> Pancreas enriched proteins indicate the at least five-fold higher gene expressions in the pancreatic tissue as compared to all other tissues analyzed in their study.

Table S2. Gene Ontology functional annotation enrichment analysis of significantly changed proteins using DAVID bioinformatic database. The 5357 proteins identified in pancreatic tissue are used as "background" for enrichment calculation.

| Category      | Term                                                                                    | Count | %    | PValue | List Total | Pop Hits | Pop Total | Fold Enrichment | Benjamini | Fisher Exact | Genes                                                                          |
|---------------|-----------------------------------------------------------------------------------------|-------|------|--------|------------|----------|-----------|-----------------|-----------|--------------|--------------------------------------------------------------------------------|
| GOTERM_BP_FAT | GO:0008630-DNA damage response, signal transduction resulting in induction of apoptosis | 4     | 2.94 | 0.0019 | 107        | 10       | 3986      | 14.90           | 8.46E-01  | 9.10E-05     | O95881, P31947, P29590                                                         |
| GOTERM_BP_FAT | GO:0008629-induction of apoptosis by intracellular signals                              | 5     | 3.68 | 0.0024 | 107        | 22       | 3986      | 8.47            | 6.88E-01  | 2.30E-04     | O95881, P31947, Q13619, P29590                                                 |
| GOTERM_BP_FAT | GO:0042770-DNA damage response, signal transduction                                     | 5     | 3.68 | 0.0067 | 107        | 29       | 3986      | 6.42            | 8.88E-01  | 9.00E-04     | O95881, Q06124, P31947, P29590                                                 |
| GOTERM_BP_FAT | GO:0045765-regulation of angiogenesis                                                   | 4     | 2.94 | 0.0112 | 107        | 18       | 3986      | 8.28            | 9.35E-01  | 1.10E-03     | Q9NY15, Q9BUP3, Q9UBU3, P29590                                                 |
| GOTERM_BP_FAT | GO:0016525-negative regulation of angiogenesis                                          | 3     | 2.21 | 0.0177 | 107        | 8        | 3986      | 13.97           | 9.69E-01  | 9.50E-04     | Q9NY15, Q9UBU3, P29590                                                         |
| GOTERM_BP_FAT | GO:0006921-cell structure disassembly during apoptosis                                  | 3     | 2.21 | 0.0177 | 107        | 8        | 3986      | 13.97           | 9.69E-01  | 9.50E-04     | O95881, Q12983                                                                 |
| GOTERM_BP_FAT | GO:0006309-DNA fragmentation involved in apoptosis                                      | 3     | 2.21 | 0.0177 | 107        | 8        | 3986      | 13.97           | 9.69E-01  | 9.50E-04     | O95881, Q12983                                                                 |
| GOTERM_BP_FAT | GO:0006974-response to DNA damage stimulus                                              | 9     | 6.62 | 0.0180 | 107        | 126      | 3986      | 2.66            | 9.48E-01  | 6.20E-03     | P46100, O95881, Q06124, P31947, Q13619, P15927, P29590, P48730                 |
| GOTERM_BP_FAT | GO:0006997-nucleus organization                                                         | 4     | 2.94 | 0.0220 | 107        | 23       | 3986      | 6.48            | 9.55E-01  | 2.90E-03     | O95881, Q12983, P29590                                                         |
| GOTERM_BP_FAT | GO:0006259-DNA metabolic process                                                        | 10    | 7.35 | 0.0244 | 107        | 159      | 3986      | 2.34            | 9.51E-01  | 9.60E-03     | P62937, Q12857, P46100, O95881, Q13619, Q12983, P15927, P29590, P48730         |
| GOTERM_BP_FAT | GO:0006308-DNA catabolic process                                                        | 4     | 2.94 | 0.0247 | 107        | 24       | 3986      | 6.21            | 9.33E-01  | 3.40E-03     | O95881, Q12983, P15927                                                         |
| GOTERM_BP_FAT | GO:0030262-apoptotic nuclear changes                                                    | 3     | 2.21 | 0.0274 | 107        | 10       | 3986      | 11.18           | 9.34E-01  | 2.00E-03     | O95881, Q12983                                                                 |
| GOTERM_BP_FAT | GO:0000737-DNA catabolic process, endonucleolytic                                       | 3     | 2.21 | 0.0329 | 107        | 11       | 3986      | 10.16           | 9.49E-01  | 2.70E-03     | O95881, Q12983                                                                 |
| GOTERM_BP_FAT | GO:0051336-regulation of hydrolase activity                                             | 8     | 5.88 | 0.0364 | 107        | 118      | 3986      | 2.53            | 9.51E-01  | 1.30E-02     | Q96BZ9, P09493, Q8IYB5, P07951, Q5H9R7, P31947, O75190, P29590                 |
| GOTERM_BP_FAT | GO:0033554-cellular response to stress                                                  | 11    | 8.09 | 0.0419 | 107        | 203      | 3986      | 2.02            | 9.60E-01  | 1.90E-02     | P09493, P46100, O95881, Q06124, Q9NR50, P31947, Q13619, P15927, P29590, P48730 |
| GOTERM_BP_FAT | GO:0051462-regulation of cartilag secretion                                             | 2     | 1.47 | 0.0525 | 107        | 2        | 3986      | 37.25           | 9.77E-01  | 7.10E-04     | Q06124, Q9UBU3                                                                 |
| GOTERM_BP_FAT | GO:0040013-negative regulation of locomotion                                            | 3     | 2.21 | 0.0735 | 107        | 17       | 3986      | 6.57            | 9.93E-01  | 9.70E-03     | P09493, P18206, Q9UBU3                                                         |
| GOTERM_BP_FAT | GO:0045069-regulation of viral genome replication                                       | 2     | 1.47 | 0.0777 | 107        | 3        | 3986      | 24.83           | 9.93E-01  | 2.10E-03     | P62937, Q15025                                                                 |
| GOTERM_BP_FAT | GO:0060123-regulation of growth hormone secretion                                       | 2     | 1.47 | 0.0777 | 107        | 3        | 3986      | 24.83           | 9.93E-01  | 2.10E-03     | Q06124, Q9UBU3                                                                 |
| GOTERM_BP_FAT | GO:0006917-induction of apoptosis                                                       | 7     | 5.15 | 0.0926 | 107        | 118      | 3986      | 2.21            | 9.96E-01  | 3.80E-02     | O95881, P31947, Q9BUP3, Q13619, Q12983, P29590                                 |
| GOTERM_BP_FAT | GO:0012502-induction of programmed cell death                                           | 7     | 5.15 | 0.0926 | 107        | 118      | 3986      | 2.21            | 9.96E-01  | 3.80E-02     | O95881, P31947, Q9BUP3, Q13619, Q12983, P29590                                 |
| GOTERM_MF_FAT | GO:0019153-protein-disulfide reductase (glutathione) activity                           | 2     | 1.47 | 0.0548 | 108        | 2        | 3848      | 35.63           | 1.00E+00  | 7.80E-04     | O95881                                                                         |
| GOTERM_MF_FAT | GO:0005484-SNAP receptor activity                                                       | 3     | 2.21 | 0.0561 | 108        | 14       | 3848      | 7.63            | 1.00E+00  | 6.20E-03     | Q86Y82, P56962, Q9NYM9                                                         |
| GOTERM_MF_FAT | GO:0019788-NEDD8 ligase activity                                                        | 2     | 1.47 | 0.0811 | 108        | 3        | 3848      | 23.75           | 9.99E-01  | 2.30E-03     | P61081, Q969M7                                                                 |
| GOTERM_MF_FAT | GO:0031625-ubiquitin protein ligase binding                                             | 3     | 2.21 | 0.0878 | 108        | 18       | 3848      | 5.94            | 9.98E-01  | 1.30E-02     | Q9LUX6, Q13619, P29590                                                         |
| GOTERM_CC_FAT | GO:0005865-striated muscle thin filament                                                | 3     | 2.21 | 0.0047 | 111        | 4        | 3858      | 26.07           | 6.30E-01  | 9.10E-05     | P09493, P06753, P07951                                                         |
| GOTERM_CC_FAT | GO:0005862-muscle thin filament tropomyosin                                             | 3     | 2.21 | 0.0047 | 111        | 4        | 3858      | 26.07           | 6.30E-01  | 9.10E-05     | P09493, P06753, P07951                                                         |
| GOTERM_CC_FAT | GO:0030530-heterogeneous nuclear ribonucleoprotein complex                              | 3     | 2.21 | 0.0830 | 111        | 17       | 3858      | 6.13            | 1.00E+00  | 1.20E-02     | Q13151, P52597, Q9UKM9                                                         |
| GOTERM_CC_FAT | GO:0016604-nuclear body                                                                 | 6     | 4.41 | 0.0901 | 111        | 84       | 3858      | 2.48            | 9.99E-01  | 3.30E-02     | Q8WTT2, Q86XP3, P09234, P61326, Q43809, P29590                                 |





**Table S3. The list of significantly changed proteins identified by Benjamini-Hochberg based two-samples *t*-test between T1D and healthy controls.**

| Accession | Protein names                                                                  | Gene name | Unique peptides | Sequence coverage | Molecular weight | Fold change | -Log t-test | Test statistic |
|-----------|--------------------------------------------------------------------------------|-----------|-----------------|-------------------|------------------|-------------|-------------|----------------|
| P16219    | Short-chain specific acyl-CoA dehydrogenase, mitochondrial                     | ACADS     | 17              | 32.5              | 44.3             | 1.53        | 4.337       | 6.312          |
| Q96CM8    | Acyl-CoA synthetase family member 2, mitochondrial                             | ACS2F2    | 2               | 4.4               | 63.7             | 1.54        | 3.343       | 4.814          |
| P63261    | Actin, cytoplasmic 2;Actin, cytoplasmic 2, N-terminally processed;Actin, cyto  | ACTG1;A1  | 14              | 62.9              | 41.8             | 1.52        | 3.385       | 4.856          |
| Q8NHP1    | Aflatoxin B1 aldehyde reductase member 4                                       | AKR7L     | 0               | 35.3              | 37.0             | 3.19        | 3.506       | 5.627          |
| P30837    | Aldehyde dehydrogenase X, mitochondrial                                        | ALDH1B1   | 26              | 37.7              | 57.2             | 1.47        | 4.146       | 5.880          |
| P05186    | Alkaline phosphatase, tissue-nonspecific isozyme                               | ALPL      | 2               | 3.1               | 48.9             | 1.85        | 3.198       | 4.828          |
| Q9UJX6    | Anaphase-promoting complex subunit 2                                           | ANAPC2    | 2               | 3.2               | 93.5             | 0.48        | 3.844       | -5.991         |
| P36404    | ADP-ribosylation factor-like protein 2                                         | ARL2;ARI  | 5               | 19                | 20.9             | 2.27        | 3.590       | 5.618          |
| P46100    | Transcriptional regulator ATRX                                                 | ATRX      | 4               | 2.6               | 278.2            | 2.67        | 4.280       | 7.024          |
| O75934    | Pre-mRNA-splicing factor SPF27                                                 | BCAS2     | 7               | 25.3              | 26.1             | 1.94        | 4.411       | 6.951          |
| C9K0G7    | D-beta-hydroxybutyrate dehydrogenase, mitochondrial                            | BDHI      | 1               | 7.2               | 18.4             | 0.67        | 4.016       | -5.730         |
| Q9NYM9    | BET1-like protein                                                              | BET1L     | 4               | 45                | 12.4             | 1.99        | 4.136       | 6.471          |
| Q12983    | BCL2/adenovirus E1B 19 kDa protein-interacting protein 3                       | BNIP3     | 1               | 6.7               | 19.9             | 6.23        | 4.262       | 7.323          |
| Q9UKR5    | Probable ergosterol biosynthetic protein 28                                    | C14orf1   | 3               | 15.7              | 15.9             | 0.49        | 3.251       | -4.985         |
| Q6P1N0    | Coiled-coil and C2 domain-containing protein 1A                                | CC2D1A    | 11              | 12.5              | 103.9            | 0.74        | 6.469       | -8.999         |
| Q16204    | Coiled-coil domain-containing protein 6                                        | CCDC6     | 9               | 16.9              | 53.3             | 1.47        | 3.698       | 5.233          |
| P40227    | T-complex protein 1 subunit zeta                                               | CCT6A     | 33              | 42.2              | 58.0             | 0.66        | 4.649       | -6.789         |
| P41208    | Centrin-2                                                                      | CETN2     | 9               | 43                | 19.7             | 0.63        | 4.000       | -5.876         |
| Q9UEE9    | Craniofacial development protein 1                                             | CFDP1     | 5               | 17.7              | 33.6             | 0.63        | 3.758       | -5.477         |
| Q8IWX8    | Calcium homeostasis endoplasmic reticulum protein                              | CHERP     | 10              | 11.5              | 104.9            | 0.65        | 3.709       | -5.351         |
| Q9UQN3    | Charged multivesicular body protein 2b                                         | CHMP2B    | 5               | 21.6              | 23.9             | 1.73        | 3.440       | 5.130          |
| O15551    | Claudin-3                                                                      | CLDN3     | 4               | 15.9              | 23.3             | 4.99        | 6.060       | 12.089         |
| Q9P003    | Protein cornichon homolog 4                                                    | CNIH4     | 1               | 13.9              | 15.8             | 2.16        | 3.343       | 5.172          |
| Q7Z7A1    | Centriolin                                                                     | CNTRL     | 1               | 6.9               | 16.9             | 5.94        | 3.350       | 5.471          |
| P02462    | Collagen alpha-1(IV) chain;Arresten                                            | COL4A1    | 11              | 5.9               | 128.0            | 1.72        | 3.464       | 5.163          |
| Q9Y6G5    | COMM domain-containing protein 10                                              | COMMD1    | 2               | 15.8              | 15.9             | 0.47        | 3.257       | -5.022         |
| H0Y8G2    | Coatomer subunit gamma-1                                                       | COPG1     | 2               | 63.2              | 8.4              | 0.26        | 3.306       | -5.319         |
| Q5R115    | Cytochrome c oxidase protein 20 homolog                                        | COX20     | 2               | 19.5              | 13.3             | 0.44        | 3.358       | -5.229         |
| P48730    | Casein kinase 1 isoform delta                                                  | CSNK1D    | 2               | 7.7               | 49.1             | 0.68        | 3.594       | -5.085         |
| Q13619    | Cullin-4A                                                                      | CUL4A     | 3               | 9.2               | 87.7             | 3.54        | 4.092       | 6.792          |
| P20711    | Aromatic-L-amino-acid decarboxylase                                            | DDC       | 2               | 7.9               | 24.8             | 4.12        | 5.640       | 10.655         |
| Q86XP3    | ATP-dependent RNA helicase DDX42                                               | DDX42     | 23              | 22.5              | 90.1             | 0.67        | 3.371       | -4.815         |
| O75190    | DnaJ homolog subfamily B member 6                                              | DNAJB6    | 1               | 17.8              | 35.7             | 2.24        | 3.335       | 5.180          |
| P50570    | Dynammin-2                                                                     | DNM2      | 2               | 20.8              | 98.0             | 1.57        | 3.788       | 5.517          |
| O60941    | Dystrobrevin;Dystrobrevin beta                                                 | DTNB      | 7               | 25.6              | 70.5             | 0.72        | 3.944       | -5.400         |
| Q9NR50    | Translation initiation factor eIF-2B subunit gamma                             | EIF2B3    | 20              | 31                | 50.2             | 0.77        | 4.050       | -5.226         |
| Q13542    | Eukaryotic translation initiation factor 4E-binding protein 2                  | EIF4EBP2  | 1               | 10.8              | 12.9             | 0.33        | 3.552       | -5.693         |
| Q15056    | Eukaryotic translation initiation factor 4H                                    | EIF4H     | 24              | 43.9              | 25.2             | 1.68        | 3.908       | 5.827          |
| Q9Y282    | Endoplasmic reticulum-Golgi intermediate compartment protein 3                 | ERGIC3    | 4               | 11.7              | 36.9             | 0.41        | 4.230       | -6.855         |
| Q16595    | Frataxin, mitochondrial;Frataxin intermediate form;Frataxin(56-210);Frataxin(7 | FXN       | 6               | 38.5              | 14.9             | 0.64        | 3.348       | -4.858         |
| Q14376    | UDP-glucose 4-epimerase                                                        | GALE      | 8               | 23.3              | 38.3             | 1.81        | 3.366       | 5.068          |
| Q14697    | Neutral alpha-glucosidase AB                                                   | GANAB     | 1               | 41.8              | 109.4            | 0.27        | 3.320       | -5.338         |
| P0CAP1    | DNA-directed RNA polymerase II subunit GRINL1A                                 | GCOM1;P   | 1               | 1.8               | 64.0             | 4.32        | 3.148       | 5.064          |
| Q96RP9    | Elongation factor G, mitochondrial                                             | GFM1      | 21              | 22.5              | 83.5             | 0.71        | 3.888       | -5.380         |
| Q9UBU3    | Appetite-regulating hormone;Ghrelin-27;Ghrelin-28;Obestatin                    | GHRL      | 7               | 51                | 11.7             | 0.44        | 3.200       | -4.967         |
| P51610    | Host cell factor 1;HCF N-terminal chain 1;HCF N-terminal chain 2;HCF N-ter     | HCFC1     | 15              | 6.4               | 213.5            | 1.45        | 3.594       | 5.045          |
| Q13151    | Heterogeneous nuclear ribonucleoprotein A0                                     | HNRNPA0   | 21              | 43                | 30.8             | 1.61        | 3.433       | 5.025          |
| P52597    | Heterogeneous nuclear ribonucleoprotein F                                      | HNRNPF    | 18              | 29.9              | 45.7             | 1.97        | 4.050       | 6.307          |
| S4R359    | Heterogeneous nuclear ribonucleoprotein K                                      | HNRNPK    | 3               | 84                | 10.6             | 4.19        | 3.108       | 4.991          |
| M0QZM1    | Heterogeneous nuclear ribonucleoprotein M                                      | HNRNPM    | 1               | 47                | 39.9             | 2.59        | 3.395       | 5.353          |
| Q9BUP3    | Oxidoreductase HTATIP2                                                         | HTATIP2   | 3               | 14.3              | 22.0             | 5.93        | 3.397       | 5.558          |
| Q96MX6    | Calcineurin subunit B type 1;WD repeat-containing protein 92                   | HZGJ;PPP  | 4               | 5.6               | 84.7             | 0.67        | 3.488       | -4.953         |
| Q70UQ0    | Inhibitor of nuclear factor kappa-B kinase-interacting protein                 | IKBIP     | 2               | 5                 | 43.1             | 0.66        | 4.225       | -6.096         |
| P49441    | Inositol polyphosphate 1-phosphatase                                           | INPP1     | 3               | 17                | 44.0             | 1.81        | 4.127       | 6.329          |
| Q9NWZ3    | Interleukin-1 receptor-associated kinase 4                                     | IRAK4     | 2               | 18.3              | 24.3             | 0.67        | 3.829       | -5.468         |
| Q9P2H0    | Uncharacterized protein KIAA1377                                               | KIAA1377  | 2               | 1.6               | 125.9            | 0.54        | 3.730       | -5.674         |
| O00139    | Kinesin-like protein KIF2A                                                     | KIF2A     | 2               | 9.9               | 32.7             | 0.49        | 3.554       | -5.482         |
| O00629    | Importin subunit alpha-3                                                       | KPNA4     | 0               | 12.1              | 57.9             | 0.61        | 3.568       | -5.263         |
| Q92615    | La-related protein 4B                                                          | LARP4B    | 4               | 7.2               | 80.6             | 0.75        | 3.778       | -4.994         |
| Q03252    | Lamin-B2                                                                       | LMNB2     | 48              | 50                | 69.9             | 1.69        | 3.563       | 5.295          |
| Q6P1A2    | Lysophospholipid acyltransferase 5                                             | LPCAT3    | 3               | 7.4               | 46.8             | 0.67        | 4.706       | -6.824         |
| Q9BS40    | Latexin                                                                        | LXN       | 3               | 11.7              | 25.8             | 0.44        | 3.340       | -5.195         |
| P61326    | Protein mago nashi homolog;Protein mago nashi homolog 2                        | MAGOH;1   | 7               | 39                | 17.2             | 2.18        | 3.542       | 5.509          |
| Q8N4V1    | Membrane magnesium transporter 1                                               | MMGT1     | 1               | 16.8              | 14.7             | 0.58        | 3.523       | -5.256         |
| Q9H8L6    | Multimerin-2                                                                   | MMRN2     | 2               | 2.6               | 104.4            | 2.52        | 3.132       | 4.901          |
| O96033    | Molybdopterin synthase sulfur carrier subunit                                  | MOCS2     | 1               | 13.3              | 9.2              | 2.42        | 3.311       | 5.179          |
| Q9H2W6    | 39S ribosomal protein L46, mitochondrial                                       | MRPL46    | 4               | 14.7              | 31.7             | 0.62        | 3.483       | -5.110         |
| Q5VZE5    | N-alpha-acetyltransferase 35, NatC auxiliary subunit                           | NAA35     | 1               | 1.4               | 83.6             | 2.75        | 3.291       | 5.198          |
| O95168    | NADH dehydrogenase [ubiquinone] 1 beta subcomplex subunit 4                    | NDUFB4    | 7               | 44.2              | 15.2             | 0.73        | 3.912       | -5.307         |
| O43920    | NADH dehydrogenase [ubiquinone] iron-sulfur protein 5                          | NDUFS5    | 9               | 54.7              | 12.5             | 1.74        | 3.353       | 5.002          |
| Q12857    | Nuclear factor 1;Nuclear factor 1 A-type;Nuclear factor 1 X-type               | NFIA;NFI  | 5               | 13.5              | 51.5             | 0.48        | 3.950       | -6.187         |
| Q8WTT2    | Nucleolar complex protein 3 homolog                                            | NOC3L     | 4               | 2.8               | 92.5             | 0.59        | 3.255       | -4.835         |
| O43809    | Cleavage and polyadenylation specificity factor subunit 5                      | NUDT21    | 8               | 30                | 26.2             | 1.47        | 3.986       | 5.650          |

|        |                                                                                      |          |     |      |       |       |       |        |
|--------|--------------------------------------------------------------------------------------|----------|-----|------|-------|-------|-------|--------|
| Q8N138 | ORM1-like protein 3;ORM1-like protein 1;ORM1-like protein 2                          | ORMDL3;  | 1   | 11.8 | 11.8  | 0.48  | 3.269 | -5.032 |
| I3L0S0 | Protein disulfide-isomerase                                                          | P4HB     | 13  | 70.3 | 16.2  | 0.45  | 3.393 | -5.278 |
| H0YBN4 | Polyadenylate-binding protein 1                                                      | PABPC1   | 1   | 56.6 | 19.7  | 4.50  | 3.367 | 5.459  |
| F8VFP3 | Myosin light polypeptide 6                                                           | PDE6H    | 2   | 76.2 | 14.4  | 0.43  | 3.803 | -6.013 |
| Q8NEN9 | PDZ domain-containing protein 8                                                      | PDZD8    | 1   | 1.2  | 128.6 | 0.61  | 3.922 | -5.821 |
| O15212 | Prefoldin subunit 6                                                                  | PFDN6    | 4   | 25.6 | 14.6  | 0.55  | 3.925 | -5.970 |
| Q8IWS0 | PHD finger protein 6                                                                 | PHF6     | 2   | 6.9  | 37.6  | 0.55  | 4.876 | -7.721 |
| P78356 | Phosphatidylinositol 5-phosphate 4-kinase type-2 beta                                | PIP4K2B  | 4   | 15.1 | 47.4  | 0.72  | 3.804 | -5.191 |
| P29590 | Protein PML                                                                          | PML      | 9   | 15.2 | 62.0  | 0.72  | 4.775 | -6.617 |
| P62937 | Peptidyl-prolyl cis-trans isomerase A;Peptidyl-prolyl cis-trans isomerase A, N- PPIA | PPIA     | 11  | 66.1 | 18.0  | 1.91  | 3.344 | 5.082  |
| P30154 | Serine/threonine-protein phosphatase 2A 65 kDa regulatory subunit A beta iso         | PPP2R1B  | 3   | 18.1 | 66.2  | 1.75  | 4.320 | 6.610  |
| Q5H9R7 | Serine/threonine-protein phosphatase 6 regulatory subunit 3                          | PPP6R3   | 9   | 11.7 | 92.4  | 0.72  | 3.525 | -4.827 |
| Q99460 | 26S proteasome non-ATPase regulatory subunit 1                                       | PSMD1    | 25  | 29.5 | 105.8 | 0.75  | 4.240 | -5.627 |
| Q06124 | Tyrosine-protein phosphatase non-receptor type 11                                    | PTPN11   | 8   | 12.5 | 68.0  | 0.75  | 4.603 | -6.107 |
| P62820 | Ras-related protein Rab-1A                                                           | RAB1A    | 20  | 65.9 | 22.7  | 1.88  | 3.525 | 5.358  |
| Q3YEC7 | Rab-like protein 6                                                                   | RABL6    | 17  | 20.4 | 79.5  | 0.59  | 5.071 | -7.902 |
| Q9UKM9 | RNA-binding protein Raly                                                             | RALY     | 13  | 31.7 | 32.5  | 1.57  | 4.199 | 6.164  |
| Q96S59 | Ran-binding protein 9                                                                | RANBP9   | 2   | 4    | 77.8  | 0.64  | 3.458 | -5.022 |
| Q9H477 | Ribokinase                                                                           | RBKS     | 2   | 7.3  | 30.4  | 0.34  | 4.374 | -7.278 |
| Q8ND24 | RING finger protein 214                                                              | RNF214   | 4   | 7.5  | 61.3  | 0.51  | 3.746 | -5.773 |
| P15927 | Replication protein A 32 kDa subunit                                                 | RPA2     | 5   | 10.7 | 29.2  | 0.54  | 3.956 | -6.054 |
| P39019 | 40S ribosomal protein S19                                                            | RPS19    | 12  | 64.8 | 16.1  | 1.86  | 3.283 | 4.964  |
| P62081 | 40S ribosomal protein S7                                                             | RPS7     | 37  | 51   | 22.1  | 2.22  | 3.482 | 5.420  |
| Q96T51 | RUN and FYVE domain-containing protein 1                                             | RUFY1    | 8   | 12.9 | 79.8  | 1.73  | 4.030 | 6.082  |
| Q9Y3A5 | Ribosome maturation protein SBDS                                                     | SBDS     | 16  | 39.2 | 28.8  | 1.47  | 4.395 | 6.270  |
| Q86TU7 | Histone-lysine N-methyltransferase setd3                                             | SETD3    | 2   | 6.8  | 33.3  | 5.36  | 3.369 | 5.492  |
| Q8WTS6 | Histone-lysine N-methyltransferase SETD7                                             | SETD7    | 4   | 9.4  | 40.1  | 2.39  | 3.144 | 4.899  |
| P31947 | 14-3-3 protein sigma                                                                 | SFN      | 2   | 16.2 | 24.3  | 5.85  | 3.756 | 6.245  |
| Q8IYB5 | Stromal membrane-associated protein 1                                                | SMAP1    | 2   | 4.6  | 49.2  | 0.59  | 3.943 | -5.896 |
| Q92925 | SWI/SNF-related matrix-associated actin-dependent regulator of chromatin su          | SMARCD   | 5   | 16.9 | 26.7  | 1.60  | 3.888 | 5.705  |
| A6NHR9 | Structural maintenance of chromosomes flexible hinge domain-containing prote         | SMCHD1   | 9   | 5.3  | 215.7 | 0.66  | 3.607 | -5.177 |
| P09661 | U2 small nuclear ribonucleoprotein A                                                 | SNRPA1   | 16  | 40   | 28.4  | 0.68  | 4.311 | -6.123 |
| P09234 | U1 small nuclear ribonucleoprotein C                                                 | SNRPC    | 2   | 11.7 | 19.7  | 3.45  | 3.421 | 5.497  |
| Q14515 | SPARC-like protein 1                                                                 | SPARCL1  | 4   | 11.9 | 61.8  | 0.25  | 3.231 | -5.199 |
| Q9NY15 | Stabilin-1                                                                           | STAB1    | 7   | 3.2  | 275.5 | 0.51  | 3.844 | -5.925 |
| Q13033 | Striatin-3                                                                           | STRN3    | 4   | 6    | 77.7  | 0.66  | 4.733 | -6.939 |
| Q86Y82 | Syntaxin-12                                                                          | STX12    | 4   | 17   | 31.6  | 1.98  | 4.598 | 7.343  |
| P56962 | Syntaxin-17                                                                          | STX17    | 3   | 41.5 | 5.0   | 3.09  | 3.798 | 6.156  |
| Q8NFX7 | Syntaxin-binding protein 6                                                           | STXBP6   | 4   | 10   | 23.6  | 2.06  | 3.728 | 5.782  |
| Q96BZ9 | TBC1 domain family member 20                                                         | TBC1D20  | 2   | 5.2  | 45.9  | 2.71  | 3.963 | 6.407  |
| P16035 | Metalloproteinase inhibitor 2                                                        | TIMP2    | 3   | 20   | 24.4  | 0.67  | 3.588 | -5.099 |
| Q9UJW2 | Tubulointerstitial nephritis antigen                                                 | TINAG    | 2   | 2.3  | 54.6  | 5.00  | 4.704 | 8.283  |
| Q9HC07 | Transmembrane protein 165                                                            | TMEM165  | 4   | 16.4 | 34.9  | 0.33  | 3.629 | -5.834 |
| Q9NV96 | Cell cycle control protein 50A                                                       | TMEM30A  | 5   | 12.2 | 40.7  | 0.45  | 3.771 | -5.923 |
| Q6PI78 | Transmembrane protein 65                                                             | TMEM65   | 3   | 14.2 | 25.5  | 0.65  | 4.116 | -5.964 |
| Q96MH6 | Transmembrane protein 68                                                             | TMEM68   | 4   | 14.2 | 37.4  | 0.56  | 3.313 | -4.975 |
| Q9H1E5 | Thioredoxin-related transmembrane protein 4                                          | TMX4     | 6   | 13.5 | 39.0  | 0.54  | 3.320 | -5.008 |
| Q15025 | TNFAIP3-interacting protein 1                                                        | TNIP1    | 2   | 3.7  | 55.7  | 0.56  | 3.457 | -5.196 |
| P60174 | Triosephosphate isomerase                                                            | TPI1     | 74  | 81.5 | 26.7  | 1.41  | 3.467 | 4.806  |
| P09493 | Tropomyosin alpha-1 chain                                                            | TPM1     | 0   | 68.4 | 37.5  | 1.90  | 3.828 | 5.875  |
| P09493 | Tropomyosin alpha-1 chain                                                            | TPM1     | 0   | 68.3 | 32.8  | 0.17  | 3.967 | -6.675 |
| P07951 | Tropomyosin beta chain                                                               | TPM2     | 0   | 58.5 | 33.0  | 2.28  | 3.850 | 6.083  |
| P06753 | Tropomyosin alpha-3 chain                                                            | TPM3     | 0   | 64.5 | 29.0  | 1.62  | 3.797 | 5.585  |
| Q5T0D9 | Tumor protein p63-regulated gene 1-like protein                                      | TPRG1L   | 2   | 13.1 | 23.3  | 0.50  | 3.448 | -5.288 |
| P19075 | Tetraspanin-8                                                                        | TSPAN8   | 6   | 14.3 | 26.0  | 3.07  | 3.429 | 5.477  |
| Q99614 | Tetrapeptide repeat protein 1                                                        | TTC1     | 7   | 23.6 | 33.5  | 0.34  | 5.107 | -8.952 |
| Q6NXR4 | TELO2-interacting protein 2                                                          | TTI2     | 1   | 4.4  | 53.3  | 2.25  | 3.438 | 5.353  |
| Q9BQE3 | Tubulin alpha-1C chain                                                               | TUBA1C;1 | 3   | 55.1 | 57.7  | 0.59  | 3.820 | -5.705 |
| M0QY37 | Tubulin beta-4A chain                                                                | TUBB4A   | 1   | 57.8 | 12.0  | 0.17  | 3.809 | -6.352 |
| O95881 | Thioredoxin domain-containing protein 12                                             | TXNDC12  | 11  | 37.8 | 19.2  | 0.65  | 3.548 | -5.115 |
| Q969M7 | NEDD8-conjugating enzyme UBE2F                                                       | UBE2F    | 3   | 25.2 | 15.7  | 0.43  | 3.444 | -5.389 |
| P61081 | NEDD8-conjugating enzyme Ubc12                                                       | UBE2M    | 4   | 19.1 | 20.9  | 0.71  | 3.720 | -5.148 |
| Q712K3 | Ubiquitin-conjugating enzyme E2 R2                                                   | UBE2R2   | 2   | 10.5 | 27.2  | 0.39  | 3.364 | -5.298 |
| Q9NWZ5 | Uridine-cytidine kinase-like 1                                                       | UCKL1    | 5   | 13.2 | 44.6  | 0.72  | 3.787 | -5.169 |
| Q9H1J1 | Regulator of nonsense transcripts 3A                                                 | UPF3A    | 1   | 9.3  | 17.1  | 3.57  | 3.293 | 5.278  |
| Q9BRT  | Ubiquinol-cytochrome-c reductase complex assembly factor 2                           | UQCCL2   | 1   | 9.9  | 11.9  | 0.66  | 3.455 | -4.959 |
| O95399 | Urotensin-2                                                                          | UTS2     | 1   | 5.8  | 16.3  | 14.71 | 4.762 | 8.679  |
| P18206 | Vinculin                                                                             | VCL      | 120 | 60   | 116.7 | 1.57  | 3.316 | 4.814  |
| Q5JSD2 | Voltage-dependent anion-selective channel protein 2                                  | VDAC2    | 1   | 45.1 | 22.2  | 0.14  | 3.602 | -5.969 |
| Q8TBZ3 | WD repeat-containing protein 20                                                      | WDR20;A  | 3   | 4.4  | 67.5  | 11.73 | 3.847 | 6.520  |
| Q15061 | WD repeat-containing protein 43                                                      | WDR43    | 5   | 5.9  | 74.9  | 4.70  | 5.035 | 9.085  |
| Q14202 | Zinc finger MYM-type protein 3                                                       | ZMYM3    | 2   | 2    | 141.8 | 0.60  | 4.750 | -7.282 |
